# Supplementary material for: Solid-state mechanochemistry for the rapid and efficient synthesis of tris-cyclometalated iridium(iii) complexes
Source: Royal Society of Chemistry journal article supplement (doi:10.1039/d3sc05796h), 2024-01-01
Supplement: d3sc05796h1.pdf [file d3sc05796h1.pdf]

# **Solid-State Mechanochemistry for the Rapid and Efficient Synthesis of Tris-Cyclometalated Iridium(III) Complexes**

Koji Kubota,<sup>\*a,b</sup> Tsubura Endo,<sup>a</sup> and Hajime Ito<sup>\*a,b</sup>

*<sup>a</sup>Division of Applied Chemistry, Graduate School of Engineering, Hokkaido University, Sapporo, Hokkaido, 060-8628, Japan.*

*<sup>b</sup>Institute for Chemical Reaction Design and Discovery (WPI-ICReDD), Hokkaido University, Sapporo, Hokkaido 001-0021, Japan.*

*e-mail: hajito@eng.hokudai.ac.jp, kbt@eng.hokudai.ac.jp*

## **Table of Contents**

- 1. Chemicals and Instrumentation**
- 2. Details of High-Temperature Ball-Milling Method**
- 3. General Procedure for Solid-State Synthesis of Iridium(III) Complexes**
- 4. List of Ligands Used in This Study**
- 5. Attempts for Synthesis in Solution**
- 6. Effects of Liquid Additives**
- 7. Calculations of E-Factors**
- 8. Characterization of Products**
- 9. References**
- 10. NMR Spectra**

## 1. Chemicals and Instrumentation

The starting materials were obtained from commercial suppliers and used as received. 2-Aryl pyridine ligands (**2b–2i**) were prepared according to the reported procedures.<sup>1</sup> Solvents were purchased from commercial suppliers and further dried over molecular sieve (MS 4Å). All mechanochemical reactions were carried out using grinding vessels in a Retsch MM400 mill (Figure S1). Both jars (1.5 mL, 5.0 mL) and balls (5 mm, 10 mm) are made of stainless-steel (SUS400B and SUS420J2, respectively) (Figure S2). The heat gun Takagi HG-1450B with temperature control function was used for high-temperature ball-milling reactions (Figure S3). NMR spectra were recorded on JEOL JNM-EC X400P and JNM-ECS400 spectrometers (<sup>1</sup>H: 392 or 396 or 399 or 401 MHz, <sup>13</sup>C: 99 or 100 MHz). Tetramethylsilane (<sup>1</sup>H), CDCl<sub>3</sub> (<sup>13</sup>C) was employed as external standards, respectively. Multiplicity was recorded as follows: s = singlet, brs = broad singlet, d = doublet, t = triplet, q = quartet, quint = quintet, sept = septet, o = octet, m = multiplet. Thermography was recorded with an NEC Avio Thermo GEAR G120. High-resolution mass spectra were recorded at the Global Facility Center, Hokkaido University.

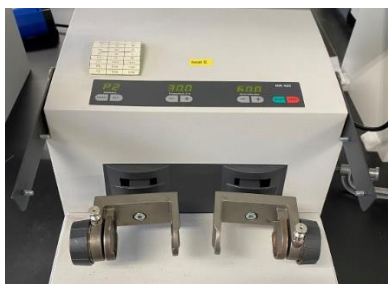

**Figure S1.** Retsch MM400 used in this study.

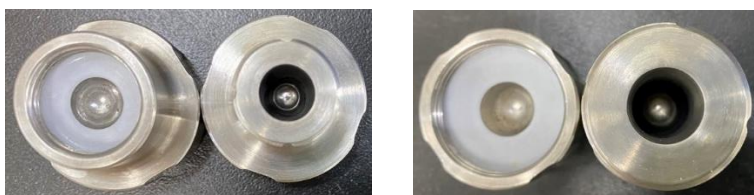

**Figure S2.** Stainless jar and ball used in this study. (Left : 1.5 ml jar and 5 mm ball, Right : 5.0 ml jar and 10 mm ball)

## 2. Details of High-Temperature Ball-Milling Method

The heat gun was fixed with clamps and placed directly above the ball milling jar (distance between the heat gun and ball milling jar: ca. 1 cm) (Figure S3).<sup>2</sup> The mechanochemical reactions were conducted while applying heated air to the outside of the milling jar (the preset temperature at 300 °C). The temperature inside the milling jar after the mechanochemical reactions was confirmed by observation with a thermography camera immediately after the milling jar (approximately 135 °C) (Figure S4).

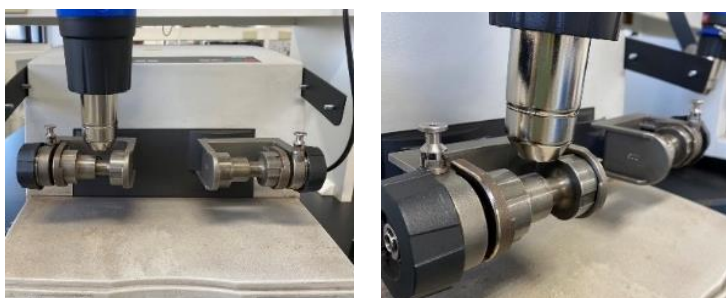

**Figure S3.** The set-up procedure for a heat gun on MM400.

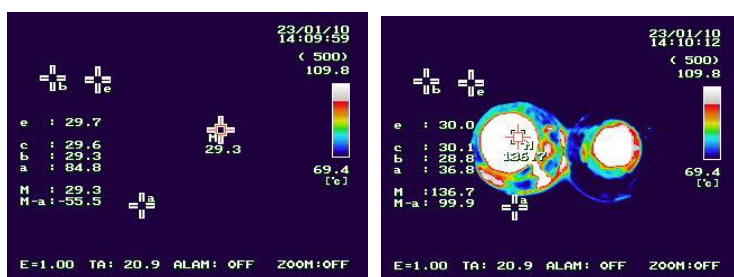

**Figure S4.** Thermography images.

### 3. General Procedure for Solid-State Synthesis of Iridium(III) Complexes

#### 1) Procedure A: solid-state synthesis of chloride-bridged dimer **3**

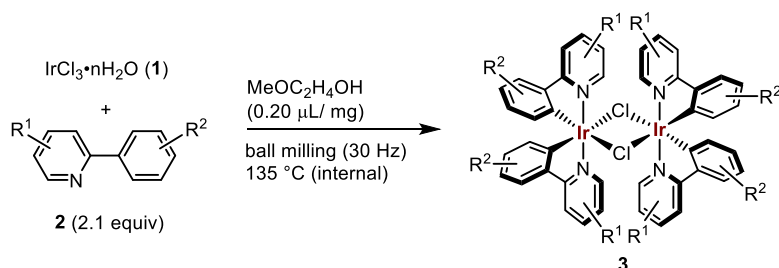

Iridium(III) chloride hydrate **1** (0.20 mmol), 2-aryl pyridine ligand **2** (0.42 mmol, 2.1 equiv), and 2-methoxyethanol (0.20  $\mu\text{L/mg}$ ) were placed in a ball milling vessel (stainless-steel, 1.5 mL) loaded with one grinding ball (stainless-steel, diameter: 5 mm). After being closed, the vessel placed in the ball mill machine (Retsch MM400, 10 or 30 min at 30 Hz) with a heat gun (the preset temperature at 300  $^\circ\text{C}$ ). After ball milling, the jar was then cooled rapidly with cold water and opened. The mixture was filtered by  $\text{H}_2\text{O}$  and  $\text{CH}_2\text{Cl}_2$  to give the corresponding chloride-bridged dimer **3**. Because the low solubility of **3** in organic solvent, the crude product **3** was used in the next step without further purification.

#### 2) Procedure B: solid-state synthesis of tris-cyclometalated iridium(III) complexes **4**

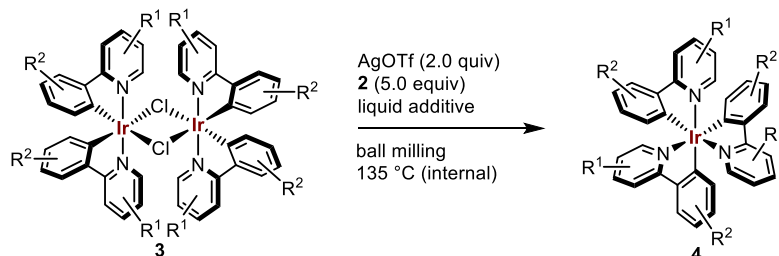

##### Method 1 (2-methoxyethanol was used as a liquid additive)

**3** (1.0 equiv), **2** (5.0 equiv), AgOTf (2.0 equiv) and 2-methoxyethanol (0.20  $\mu\text{L/mg}$ ) were placed in a ball milling vessel (stainless-steel, 1.5 mL) loaded with one grinding ball (stainless-steel, diameter: 5 mm). After being closed, the vessel placed in the ball mill machine (Retsch MM400, 60 or 90 min at 30 Hz) with a heat gun (the preset temperature at 300  $^\circ\text{C}$ ). After ball milling, the jar was then cooled rapidly with cold water and opened. The mixture was filtered by  $\text{CH}_2\text{Cl}_2$  to remove silver salts. The crude mixture was then purified by flash column chromatography ( $\text{SiO}_2$ , typically  $\text{CH}_2\text{Cl}_2$ /hexane, typically 0:100-100:0) or reprecipitation from  $\text{CH}_2\text{Cl}_2$ /hexane to give the corresponding tris-cyclometalated iridium(III) complexes **4**.

### Method 2 (DMF was used as a liquid addvie)

**3** (1.0 equiv), **2** (5.0 equiv), AgOTf (2.0 equiv) and *N,N*-dimethylformamide (DMF) (0.50  $\mu\text{L}/\text{mg}$ ) were placed in a ball milling vessel (stainless, 5.0 mL) loaded with one grinding ball (stainless, diameter: 10 mm). After being closed, the vessel placed in the ball mill machine (Retsch MM400, 60 or 90 min at 20 Hz) with a heat gun (the preset temperature at 300  $^{\circ}\text{C}$ ). After ball milling, the jar was then cooled rapidly with cold water and opened. The mixture was filtered by  $\text{CH}_2\text{Cl}_2$  to remove Ag salts. The crude mixture was then purified by flash column chromatography ( $\text{SiO}_2$ , typically  $\text{CH}_2\text{Cl}_2/\text{hexane}$ , typically 0:100-100:0) or reprecipitation from  $\text{CH}_2\text{Cl}_2/\text{hexane}$  to give the corresponding tris-cyclometalated iridium(III) complexes **4**.

### 3) Procedure C: solid-state one-pot synthesis of tris-cyclometalated iridium(III) complexes **4**

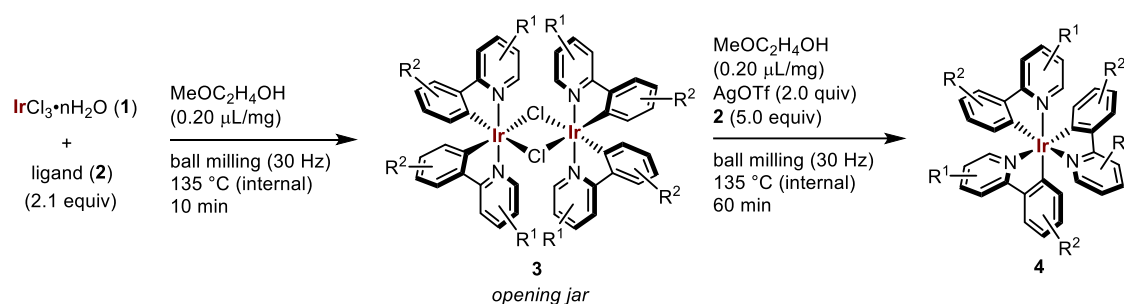

Iridium(III) chloride hydrate **1** (0.20 mmol), **2** (0.42 mmol, 2.1 equiv), and 2-methoxyethanol (0.20  $\mu\text{L}/\text{mg}$ ) were placed in a ball milling vessel (stainless, 1.5 mL) loaded with one grinding ball (stainless, diameter: 5 mm). After being closed, the vessel placed in the ball mill machine (Retsch MM400, 10 or 30 min at 30 Hz) with a heat gun (the preset temperature at 300  $^{\circ}\text{C}$ ). After ball milling, the jar was rapidly opened. Then **2** (5.0 equiv to **3**), AgOTf (2.0 equiv to **3**) and 2-methoxyethanol (0.20  $\mu\text{L}/\text{mg}$ ) were placed in a the vessel. After being closed, the vessel placed in the ball mill machine (Retsch MM400, 60 min at 30 Hz) with a heat gun (the preset temperature at 300  $^{\circ}\text{C}$ ). After ball milling, the jar was then cooled rapidly with cold water and opened. The mixture was filtered by  $\text{CH}_2\text{Cl}_2$  to remove Ag salts. The crude mixture was then purified by flash column chromatography ( $\text{SiO}_2$ , typically  $\text{CH}_2\text{Cl}_2/\text{hexane}$ , typically 0:100-100:0) or reprecipitation from  $\text{CH}_2\text{Cl}_2/\text{hexane}$  to give the corresponding tris-cyclometalated iridium(III) complexes **4**.

#### 4. List of Ligands Used in This Study.

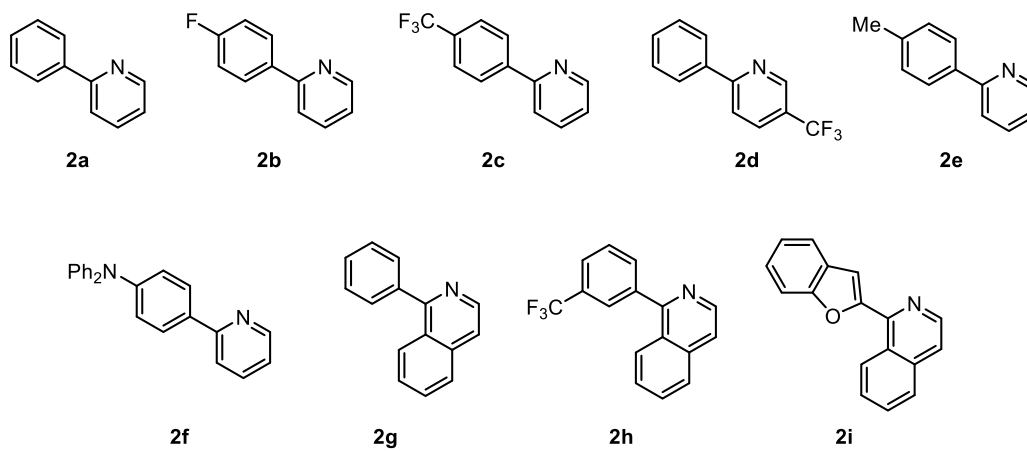

## 5. Attempts for One-Pot Synthesis in Solution

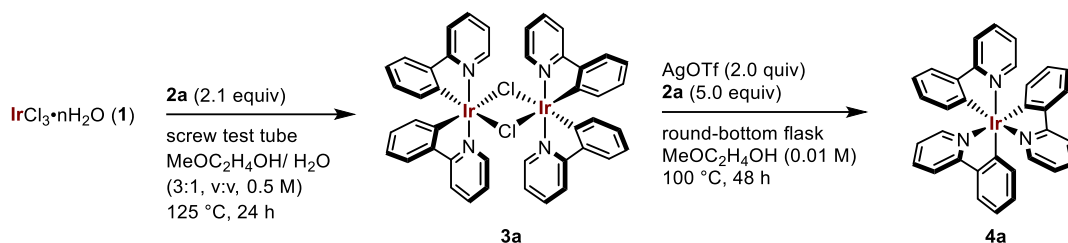

An oven-dried reaction vial was charged with iridium(III) chloride hydrate **1** (59.6 mg, 0.20 mmol), **2a** (68.5 mg, 0.44 mmol, 2.2 equiv) and then the vial was capped with a rubber septum. The vial with reagents was refilled with a nitrogen atmosphere and the solids were suspended in 2-methoxyethanol/H<sub>2</sub>O (300 μL/100 μL), then the suspension was allowed to stir at 125 °C for 24 h. After completing the reaction, the mixture was moved an oven-dried round-bottom flask and added **2** (77.6 mg, 0.5 mmol, 5.0 equiv to **3a**), AgOTf (52.5 mg, 0.20 mmol, 2.0 equiv to **3a**). The flask was refilled with a nitrogen atmosphere and the solids were suspended in 2-methoxyethanol (20 mL), then the suspension was allowed to stir at 100 °C for 48 h. After completing the reaction, the mixture was cooled and opened. The mixture was filtered by MeOH/CH<sub>2</sub>Cl<sub>2</sub> to give the crude mixture. The desired product **4a** was not detected by <sup>1</sup>H NMR analysis of the crude mixture.

## 6. Effects of Liquid Additives

We have investigated the effect of other liquid additives. We have tested polar solvents such as EtOH, glycerol, DMF, and DMSO, which furnished **3a** in comparable yields (55-75%) that are lower than that of the conditions using 2-methoxyethanol. The use of PEG-400 did not improve the yield of **3a** (78%). We also checked a non-polar solvent (toluene), which provided inferior results (58%).

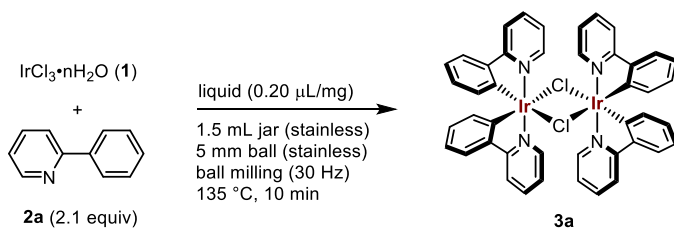

| liquid                              | yield of <b>3a</b> (%) |
|-------------------------------------|------------------------|
| MeOC <sub>2</sub> H <sub>4</sub> OH | 80%                    |
| EtOH                                | 75%                    |
| Glycerol                            | 71%                    |
| DMF                                 | 70%                    |
| DMSO                                | 55%                    |
| PEG-400                             | 78%                    |
| toluene                             | 58%                    |

**Table S1.** Effects of liquid additives for the first ligand exchange.



## 7. Calculations of E-Factors

### For the first ligand exchange

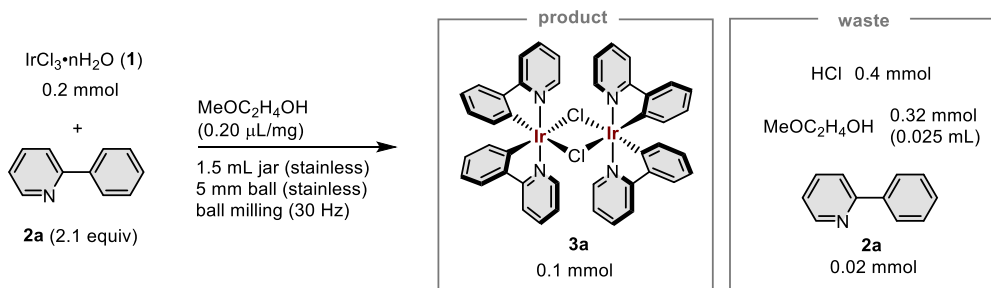

E-factor for the first ligand exchange in the solid-state.

| this work                           | M <sub>w</sub> | mmol  | mg     |
|-------------------------------------|----------------|-------|--------|
| product ( <b>3a</b> )               | 1072.10        | 0.10  | 107.21 |
| waste                               | M <sub>w</sub> | mmol  | mg     |
| HCl                                 | 36.46          | 0.40  | 14.58  |
| MeOC <sub>2</sub> H <sub>4</sub> OH | 76.10          | 0.32  | 24.35  |
| unreacted <b>2a</b>                 | 155.20         | 0.020 | 3.10   |
| total                               |                |       | 149.24 |

$$E_{\text{mechanochemical}} = 149.24 / 107.21 = 1.39$$

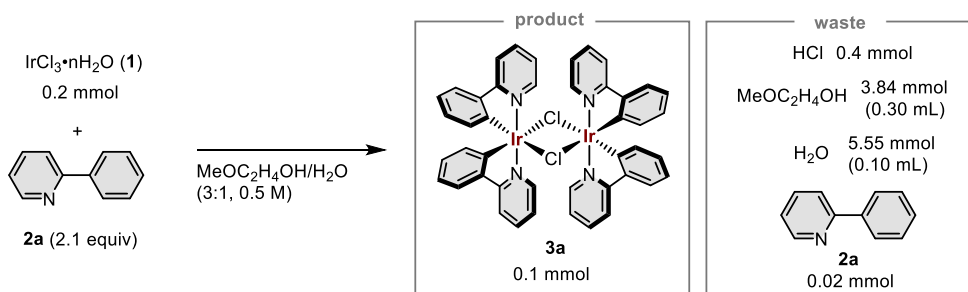

E-factor for the first ligand exchange in solution.

| this work                           | M <sub>w</sub> | mmol  | mg     |
|-------------------------------------|----------------|-------|--------|
| product ( <b>3a</b> )               | 1072.10        | 0.10  | 107.21 |
| waste                               | M <sub>w</sub> | mmol  | mg     |
| HCl                                 | 36.46          | 0.40  | 14.58  |
| MeOC <sub>2</sub> H <sub>4</sub> OH | 76.10          | 3.84  | 292.22 |
| H <sub>2</sub> O                    | 18.02          | 5.55  | 100.01 |
| unreacted <b>2a</b>                 | 155.20         | 0.020 | 3.10   |
| total                               |                |       | 517.12 |

$$E_{\text{solution}} = 517.12 / 107.21 = 4.82$$

### For the second ligand exchange

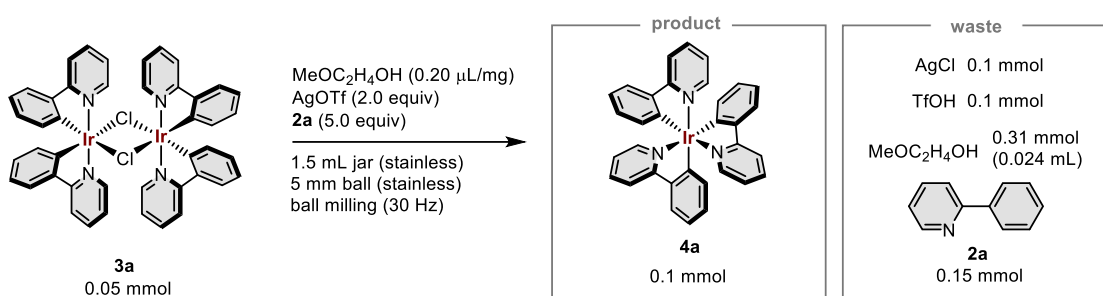

E-factor for the second ligand exchange in the solid-state.

| this work                          | $M_w$  | mmol | mg     |
|------------------------------------|--------|------|--------|
| product ( <b>4a</b> )              | 654.79 | 0.10 | 65.48  |
| waste                              | $M_w$  | mmol | mg     |
| $\text{AgCl}$                      | 143.32 | 0.10 | 14.33  |
| $\text{TfOH}$                      | 150.07 | 0.10 | 15.01  |
| $\text{MeOC}_2\text{H}_4\text{OH}$ | 76.10  | 0.31 | 23.56  |
| unreacted <b>2a</b>                | 155.20 | 0.15 | 23.28  |
| total                              |        |      | 141.66 |

$$E_{\text{mechanochemical}} = 141.66 / 65.48 = \mathbf{2.16}$$

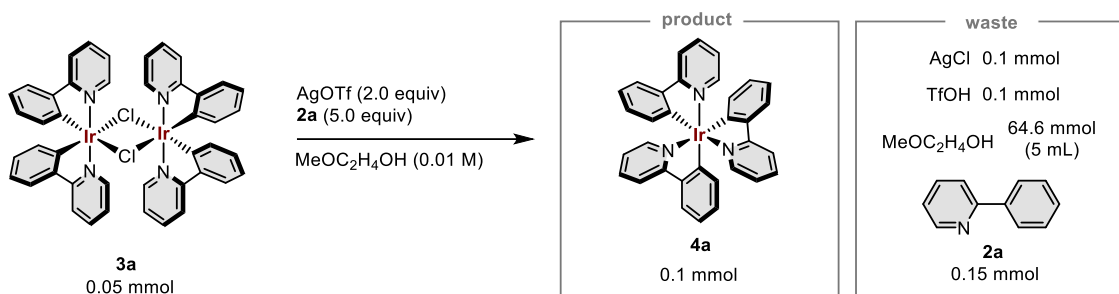

E-factor for the second ligand exchange in solution.

| this work                          | $M_w$  | mmol | mg      |
|------------------------------------|--------|------|---------|
| product ( <b>4a</b> )              | 654.79 | 0.10 | 65.48   |
| waste                              | $M_w$  | mmol | mg      |
| $\text{AgCl}$                      | 143.32 | 0.10 | 14.33   |
| $\text{TfOH}$                      | 150.07 | 0.10 | 15.01   |
| $\text{MeOC}_2\text{H}_4\text{OH}$ | 76.10  | 64.6 | 4915.74 |
| unreacted <b>2a</b>                | 155.20 | 0.15 | 23.28   |
| total                              |        |      | 5033.84 |

$$E_{\text{solution}} = 5033.84 / 65.48 = \mathbf{76.88}$$

## 8. Characterization of Products.

In this study, the generation of meridional (*mer*) tris-cyclometalated iridium (III) complexes were not confirmed in the crude reaction mixtures, and the facial (*fac*) complexes were obtained exclusively under mechanochemical conditions.<sup>3</sup>

### Dichlorotetrakis[2-(2-pyridinyl)phenyl]diiridium(III) (**3a**).

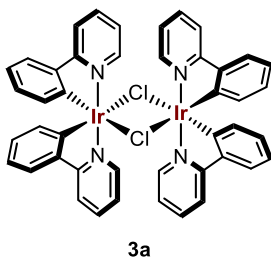

The reaction was performed according to the general procedure A (ball-milling time: 10 min). The reaction was carried out with 59.7 mg (0.20 mmol) of **1**. The product **3a** was obtained as a yellow powder (87.1 mg, 0.081 mmol, 81% yield) after reprecipitation from CH<sub>2</sub>Cl<sub>2</sub>/hexane.

<sup>1</sup>H NMR (400 MHz, CDCl<sub>3</sub>, δ): 5.93 (d, *J* = 8.0 Hz, 4H), 6.56 (td, *J* = 0.8, 7.2 Hz, 4H), 6.72–6.80 (m, 8H), 7.49 (dd, *J* = 1.2, 8.0 Hz, 4H), 7.74 (td, *J* = 1.2, 8.0 Hz, 4H), 7.87 (d, *J* = 8.0 Hz, 4H), 9.24 (dd, *J* = 0.8, 5.6 Hz, 4H). <sup>13</sup>C NMR (99 MHz, CDCl<sub>3</sub>, δ): 118.4 (CH), 121.3 (CH), 122.1 (CH), 123.6 (CH), 126.3 (CH), 129.1 (CH), 130.6 (CH), 136.1 (CH), 143.7 (CH), 145.3 (C), 147.5 (C), 151.7 (CH), 168.5 (C). The monomer of **3a** was only detected by ESI high-resolution mass spectrometry. HRMS-ESI (*m/z*): [M–Cl]<sup>+</sup> calcd for C<sub>22</sub>H<sub>16</sub>IrN<sub>2</sub>, 499.0914; found, 499.0912.

### *fac*-Tris(2-phenylpyridinato)iridium(III) (**4a**).

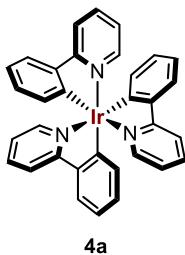

The reaction was performed according to the general procedure B, Method 1 (ball-milling time: 60 min). The reaction was carried out with 54.4 mg (0.051 mmol) of **3a**. The product **4a** was obtained as a yellow powder (47.9 mg, 0.073 mmol, 73% yield) after purification by silica-gel column chromatography (SiO<sub>2</sub>, CH<sub>2</sub>Cl<sub>2</sub>/hexane, 0:100–50:50).

<sup>1</sup>H NMR (392 MHz, CDCl<sub>3</sub>, δ): 6.80–6.92 (m, 12H), 7.53 (d, *J* = 4.8 Hz, 3H), 7.59 (td, *J* = 1.2, 8.0 Hz, 3H), 7.66 (d, *J* = 7.2 Hz, 3H), 7.88 (d, *J* = 8.4 Hz, 3H). <sup>13</sup>C NMR signals were barely detected

because of the low solubility of **4a**. HRMS-ESI ( $m/z$ ):  $[M+Na]^+$  calcd for  $C_{33}H_{24}IrN_3Na$ , 676.1468; found, 676.1465.

***fac*-Tris[2-(4-fluorophenyl)pyridinato]iridium(III) (**4b**).**

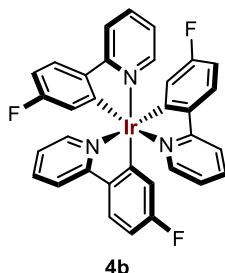

The reactions were performed according to the general procedure A (ball-milling time: 10 min) for the first ligand exchange and the general procedure B, Method 1 (ball-milling time: 60 min) for the second ligand exchange. The first ligand exchange reaction was carried out with 59.7 mg (0.20 mmol) of **1** to give the crude dimer product **3b** (93.2 mg, 0.09781 mmol, 81% yield), which was used directly for the next step without further purification. The second ligand exchange reaction was carried out with 85.4 mg of **3b** (0.075 mmol). The product **4b** was obtained as a yellow-green powder (85.2 mg, 0.120 mmol, 81% yield) (66% yield in 2 steps) after purification by silica-gel column chromatography ( $SiO_2$ ,  $CH_2Cl_2$ /hexane, 0:100–50:50).

$^1H$  NMR (392 MHz,  $CDCl_3$ ,  $\delta$ ): 6.45 (dd,  $J = 2.7, 10.2$  Hz, 3H), 6.61 (td,  $J = 2.7, 8.8$  Hz, 3H), 6.88 (t,  $J = 6.3$  Hz, 3H), 7.47 (d,  $J = 5.5$  Hz, 3H), 7.62 (dd,  $J = 5.9, 8.6$  Hz, 6H), 7.82 (d,  $J = 8.6$  Hz, 3H).  $^{13}C$  NMR (99 MHz,  $CDCl_3$ ,  $\delta$ ): 107.6 (d,  $J = 23.4$  Hz, CH), 118.8 (CH), 121.7 (CH), 122.2 (d,  $J = 16.9$  Hz, CH), 125.7 (d,  $J = 9.5$  Hz, CH), 136.3 (CH), 139.8 (C), 147.0 (CH), 163.1 (d,  $J = 52.6$  Hz, C), 164.4 (d,  $J = 193.5$  Hz, C), 165.5 (C). HRMS-ESI ( $m/z$ ):  $[M]^+$  calcd for  $C_{33}H_{21}F_3IrN_3$ , 707.1294; found, 707.1286.

***fac*-Tris{2-[4-(trifluoromethyl)phenyl]pyridinato}iridium(III) (**4c**).**

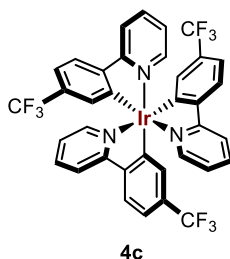

The reactions were performed according to the general procedure A (ball milling time: 10 min) for the first ligand exchange and the general procedure B, Method 1 (ball-milling time: 60 min) for the second ligand exchange. The first ligand exchange reaction was carried out with 60.3 mg (0.20 mmol) of **1** to give the crude dimer product **3c** (130.4 mg, 0.097 mmol, 96% yield), which was used directly for the

next step without further purification. The second ligand exchange reaction was carried out with 121.2 mg of **3c** (0.090 mmol). The product **4c** was obtained as a yellow powder (91.7 mg, 0.107 mmol, 59% yield) (57% yield in 2 steps) after purification by silica-gel column chromatography (SiO<sub>2</sub>, CH<sub>2</sub>Cl<sub>2</sub>/hexane, 0:100–50:50).

<sup>1</sup>H NMR (392 MHz, CDCl<sub>3</sub>, δ): 6.94 (d, *J* = 1.2 Hz, 3H), 6.97–7.02 (m, 3H), 7.15 (dd, *J* = 2.0, 8.0 Hz, 3H), 7.50–7.55 (m, 3H), 7.68–7.74 (m, 6H), 7.97 (d, *J* = 8.0 Hz, 3H). <sup>13</sup>C NMR signals were barely detected because of the low solubility of **4c**. HRMS-ESI (*m/z*): [M]<sup>+</sup> calcd for C<sub>36</sub>H<sub>21</sub>F<sub>9</sub>IrN<sub>3</sub>, 857.1198; found, 857.1192.

***fac*-Tris[2-phenyl-5-(trifluoromethyl)pyridinato]iridium(III) (**4d**).**

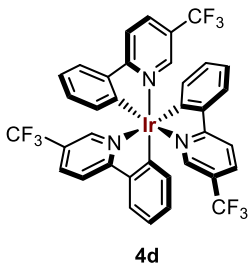

The reactions were performed according to the general procedure A (ball-milling time: 10 min) for the first ligand exchange and the general procedure B, Method 1 (ball-milling time: 60 min) for the second ligand exchange. The first ligand exchange reaction was carried out with 59.7 mg (0.20 mmol) of **1** to give the crude dimer product **3d** (71.5 mg, 0.054 mmol, 53% yield), which was used directly for the next step without further purification. The second ligand exchange reaction was carried out with 64.8 mg of **3d** (0.048 mmol). The product **4d** was obtained as a yellow powder (55.2 mg, 0.064 mmol, 67% yield) (36% yield in 2 steps) after purification by silica-gel column chromatography (SiO<sub>2</sub>, CH<sub>2</sub>Cl<sub>2</sub>/hexane, 0:100–50:50).

<sup>1</sup>H NMR (400 MHz, CDCl<sub>3</sub>, δ): 6.81 (dd, *J* = 1.2, 7.6 Hz, 3H), 6.92 (td, *J* = 1.2, 7.6 Hz, 3H), 6.99 (td, *J* = 1.2, 7.2 Hz, 3H), 7.67 (s, 3H), 7.73 (dd, *J* = 1.6, 8.0 Hz, 3H), 7.85 (dd, *J* = 2.0, 8.8 Hz, 3H), 8.02 (d, *J* = 8.4 Hz, 3H). <sup>13</sup>C NMR (99 MHz, CDCl<sub>3</sub>, δ): 118.9 (CH), 120.9 (CH), 121.3 (C), 124.1 (C), 124.8 (C), 125.1 (C), 125.6 (CH), 131.5 (CH), 133.7 (CH), 137.2 (CH), 141.8 (C), 143.79 (CH), 143.84 (CH), 161.0 (C), 170.0 (C). HRMS-ESI (*m/z*): [M]<sup>+</sup> calcd for C<sub>36</sub>H<sub>21</sub>F<sub>9</sub>IrN<sub>3</sub>, 857.1198; found, 857.1180

***fac*-Tris[2-(*p*-tolyl)pyridinato]iridium(III) (**4e**).**

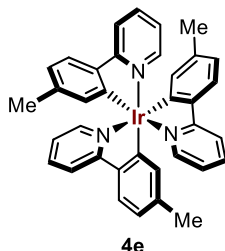

The reactions were performed according to the general procedure A (ball-milling time: 10 min) for the first ligand exchange and the general procedure B, Method 1 (ball-milling time: 60 min) for the second ligand exchange. The first ligand exchange reaction was carried out with 60.4 mg (0.20 mmol) of **1** to give the crude dimer product **3e** (97.8 mg, 0.087 mmol, 86% yield), which was used directly for the next step without further purification. The second ligand exchange reaction was carried out with 92.1 mg of **3e** (0.082 mmol). The product **4e** was obtained as a white powder (35.5 mg, 0.051 mmol, 31% yield) (27% yield in 2 steps) after purification by silica-gel column chromatography (SiO<sub>2</sub>, CH<sub>2</sub>Cl<sub>2</sub>/hexane, 0:100–50:50).

<sup>1</sup>H NMR (392 MHz, CDCl<sub>3</sub>, δ): 2.12 (s, 9H), 6.57 (s, 3H), 6.66 (d, *J* = 7.4 Hz, 3H), 6.77 (s, 3H), 7.43 (s, 3H), 7.51–7.59 (m, 6H), 7.81 (d, *J* = 8.2 Hz, 3H). <sup>13</sup>C NMR (99 MHz, CDCl<sub>3</sub>, δ): 21.9 (CH<sub>3</sub>), 118.3 (CH), 121.0 (CH), 121.3 (CH), 123.6 (CH), 135.6 (CH), 137.7 (CH), 139.4 (C), 141.1 (C), 146.9 (CH), 161.4 (C), 166.7 (C). HRMS-ESI (*m/z*): [M]<sup>+</sup> calcd for C<sub>36</sub>H<sub>30</sub>IrN<sub>3</sub>, 695.2046; found, 695.2042.

***fac*-Tris[*N,N*-diphenyl-4-(pyridin-2-yl)anilinato]iridium(III) (**4f**).**

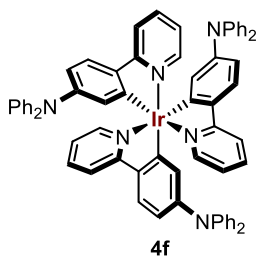

The reactions were performed according to the general procedure A (ball-milling time: 10 min) for the first ligand exchange and the general procedure B, Method 1 (ball-milling time: 60 min) for the second ligand exchange. The first ligand exchange reaction was carried out with 60.2 mg (0.20 mmol) of **1** to give the crude dimer product **3f** (190.3 mg, 0.109 mmol, >99% yield), which was used directly for the next step without further purification. The second ligand exchange reaction was carried out with 178.1 mg of **3f** (0.102 mmol). The product **4f** was obtained as a red powder (49.4 mg, 0.043 mmol, 21% yield) (21% yield in 2 steps) after purification by silica-gel column chromatography (SiO<sub>2</sub>, CH<sub>2</sub>Cl<sub>2</sub>/hexane, 0:100–50:50).

<sup>1</sup>H NMR (392 MHz, CDCl<sub>3</sub>, δ): 6.25 (dd, *J* = 2.4, 8.6 Hz, 3H), 6.58 (d, *J* = 2.7 Hz, 3H), 6.76–6.90 (m,

21H), 7.09 (t,  $J = 7.8$  Hz, 12H), 7.27 (d,  $J = 7.4$  Hz, 3H), 7.51–7.57 (m, 6H), 7.69 (d,  $J = 7.8$  Hz, 3H).  $^{13}\text{C}$  NMR (99 MHz,  $\text{CDCl}_3$ ,  $\delta$ ): 114.5 (CH), 117.7 (CH), 120.5 (CH), 122.1 (CH), 124.5 (CH), 124.7 (CH), 128.6 (CH), 130.1 (CH), 135.4 (CH), 137.5 (C), 147.2 (C), 147.6 (CH), 148.2 (C), 161.8 (C), 166.2 (C). HRMS-ESI ( $m/z$ ):  $[\text{M}]^+$  calcd for  $\text{C}_{69}\text{H}_{51}\text{IrN}_6$ , 1154.3781; found, 1154.3813.

***fac*-Tris(1-phenylisoquinolino)iridium(III) (4g).**

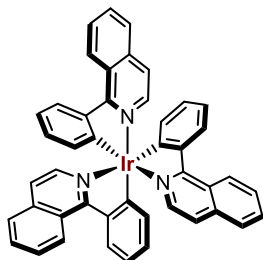

**4g**

The reactions were performed according to the general procedure A (ball-milling time: 30 min) for the first ligand exchange and the general procedure B, Method 2 (ball-milling time: 90 min) for the second ligand exchange. The first ligand exchange reaction was carried out with 59.7 mg (0.20 mmol) of **1** to give the crude dimer product **3g** (77.0 mg, 0.061 mmol, 61% yield), which was used directly for the next step without further purification. The second ligand exchange reaction was carried out with 62.2 mg of **3g** (0.049 mmol). The product **4g** was obtained as a red powder (71.5 mg, 0.089 mmol, 91% yield) (56% yield in 2 steps) after purification by silica-gel column chromatography ( $\text{SiO}_2$ ,  $\text{CH}_2\text{Cl}_2$ /hexane, 0:100–80:20).

$^1\text{H}$  NMR (392 MHz,  $\text{CDCl}_3$ ,  $\delta$ ): 6.87 (t,  $J = 7.3$  Hz, 3H), 6.95–7.01 (m, 6H), 7.12 (d,  $J = 6.3$  Hz, 3H), 7.31 (d,  $J = 6.3$  Hz, 3H), 7.61–7.68 (m, 6H), 7.70–7.75 (m, 3H), 8.20 (d,  $J = 7.8$  Hz, 3H), 8.94–9.00 (m, 3H).  $^{13}\text{C}$  NMR signals were barely detected because of the low solubility of **4g**. HRMS-ESI ( $m/z$ ):  $[\text{M}]^+$  calcd for  $\text{C}_{45}\text{H}_{30}\text{IrN}_3$ , 803.2046; found, 803.2038.

***fac*-Tris{1-[3-(trifluoromethyl)phenyl]isoquinolino}iridium(III) (4h).**

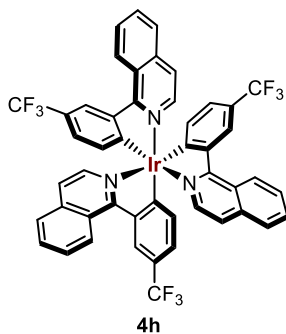

**4h**

The reactions were performed according to the general procedure A (ball-milling time: 30 min) for the

first ligand exchange and the general procedure B, Method 1 (ballmilling time: 90 min) for the second ligand exchange. The first ligand exchange reaction was carried out with 60.3 mg (0.20 mmol) of **1** to give the crude dimer product **3h** (157.6 mg, 0.102 mmol, >99% yield), which was used directly for the next step without further purification. The second ligand exchange reaction was carried out with 132.5 mg of **3h** (0.086 mmol). The product **4h** was obtained as a red powder (106.2 mg, 0.105 mmol, 61% yield) (61% yield in 2 steps) after purification by silica-gel column chromatography (SiO<sub>2</sub>, CH<sub>2</sub>Cl<sub>2</sub>/hexane, 0:100–80:20).

<sup>1</sup>H NMR (392 MHz, CDCl<sub>3</sub>, δ): 7.00 (d, *J* = 7.8 Hz, 3H), 7.06 (d, *J* = 8.2 Hz, 3H), 7.25 (d, *J* = 6.3 Hz, 3H), 7.33 (d, *J* = 5.9 Hz, 3H), 7.70–7.83 (m, 9H), 8.40 (s, 3H), 8.88 (d, *J* = 7.8 Hz, 3H). <sup>13</sup>C NMR (99 MHz, CDCl<sub>3</sub>, δ): 121.5 (CH), 126.0 (CH), 126.1 (CH), 126.5 (C), 126.9 (CH), 127.3 (CH), 128.6 (CH), 130.8 (CH), 136.8 (C), 137.2 (CH), 139.4 (CH), 145.4 (C), 166.1 (C), 168.8 (C). HRMS-ESI (*m/z*): [M]<sup>+</sup> calcd for C<sub>48</sub>H<sub>27</sub>F<sub>9</sub>IrN<sub>3</sub>, 1007.1667; found, 1007.1656.

***fac*-Tris[1-(benzofuran-2-yl)isoquinolinato]iridium(III) (**4i**).**

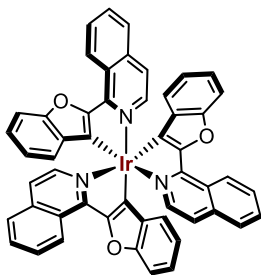

**4i**

The reactions were performed according to the general procedure A (ball-milling time: 30 min) for the first ligand exchange and the general conditions B, Method 1 (ball-milling time: 90 min) for the second ligand exchange. The first ligand exchange reaction was carried out with 61.5 mg (0.21 mmol) of **1** to give the crude dimer product **3i** (134.2 mg, 0.091 mmol, 91% yield) which was used directly for the next step without further purification. The second-step reaction was carried out with 128.2 mg of **3i** (0.089 mmol). The product **4i** was obtained as a red powder (116.0 mg, 0.125 mmol, 70% yield) (64% yield in 2 steps) after purification by silica-gel column chromatography (SiO<sub>2</sub>, CH<sub>2</sub>Cl<sub>2</sub>/hexane, 0:100–70:30).

<sup>1</sup>H NMR (392 MHz, CDCl<sub>3</sub>, δ): 6.66 (d, *J* = 7.8 Hz, 3H), 6.78 (t, *J* = 7.6 Hz, 3H), 7.03 (d, *J* = 6.2 Hz, 3H), 7.19 (t, *J* = 7.8 Hz, 3H), 7.38 (d, *J* = 6.3 Hz, 3H), 7.52 (d, *J* = 8.2 Hz, 3H), 7.64–7.71 (m, 9H), 9.41 (d, *J* = 8.2 Hz, 3H). <sup>13</sup>C NMR (99 MHz, CDCl<sub>3</sub>, δ): 110.9 (CH), 117.8 (CH), 122.2 (CH), 124.6 (C), 125.5 (CH), 125.8 (CH), 126.1 (CH), 127.1 (CH), 127.5 (CH), 131.2 (CH), 136.6 (C), 136.7 (C), 137.3 (C), 141.6 (CH), 155.3 (C), 157.3 (C), 159.2 (C). HRMS-EI (*m/z*): [M]<sup>+</sup> calcd for C<sub>51</sub>H<sub>30</sub>IrN<sub>3</sub>O<sub>3</sub>, 923.1893; found, 923.1893.



***fac*-Tris(2-phenylquinolino)iridium(III) (4j).**

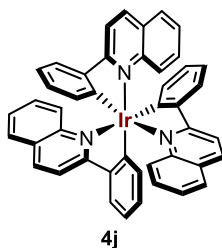

The reactions were performed according to the general procedure A (ball-milling time: 30 min) for the first ligand exchange and the general conditions B, Method 1 (ball-milling time: 90 min) for the second ligand exchange. The first ligand exchange reaction was carried out with 60.2 mg (0.20 mmol) of **1** to give the crude dimer product **3j** (123.3 mg, 0.097 mmol, 96% yield), which was used directly for the next step without further purification. The second ligand exchange reaction was carried out with 110.0 mg of **3j** (0.086 mmol). The product **4j** was obtained as a red powder (68.3 mg, 0.085 mmol, 49% yield) (47% yield in 2 steps) after purification by silica-gel column chromatography (SiO<sub>2</sub>, CH<sub>2</sub>Cl<sub>2</sub>/hexane, 0:100–100:0).

<sup>1</sup>H NMR (392 MHz, CDCl<sub>3</sub>, δ): 6.47 (d, *J* = 7.8 Hz, 3H), 6.66–6.71 (m, 6H), 6.85 (t, *J* = 7.4 Hz, 3H), 7.18 (t, *J* = 7.4 Hz, 3H), 7.66 (d, *J* = 7.4 Hz, 3H), 7.74 (d, *J* = 7.8 Hz, 3H), 8.00 (d, *J* = 9.0 Hz, 3H), 8.03–8.10 (m, 6H). <sup>13</sup>C NMR signals were barely detected because of the low solubility of **4j**. HRMS-EI (*m/z*): [M]<sup>+</sup> calcd for C<sub>45</sub>H<sub>30</sub>IrN<sub>3</sub>, 803.2046; found, 803.2051.

**Bis[2-(2-pyridinyl-*N*)phenyl-C](2,4-pentanedionato-*O2,O4*)iridium(III) (5).**

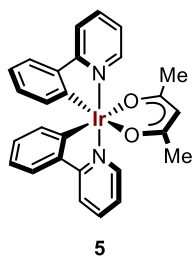

Chloride-bridged dimer **3a** (54.6 mg, 0.051 mmol), acetylacetone (50.6 mg, 0.51 mmol, 10 equiv), K<sub>2</sub>CO<sub>3</sub> (140.0 mg, 1.01 mmol, 20 equiv) and 2-methoxyethanol (0.20 μL/mg) were placed in a ball milling vessel (stainless, 1.5 mL) loaded with one grinding ball (stainless, diameter: 5 mm). After being closed, the vessel placed in the ball mill machine (Retsch MM400, 60 min at 30 Hz) with a heat gun (the preset temperature at 300 °C). After ball milling, the jar was then cooled rapidly with cold water and opened. The mixture was filtered by H<sub>2</sub>O and Et<sub>2</sub>O to give the desired product **5** as a orange powder (49.9 mg, 0.083 mmol, 83% yield).

<sup>1</sup>H NMR (400 MHz, CDCl<sub>3</sub>, δ): 1.78 (s, 6H), 5.21 (s, 1H), 6.26 (d, *J* = 6.8 Hz, 2H), 6.68 (td, *J* = 1.6, 7.2 Hz, 2H), 6.80 (t, *J* = 8.0 Hz, 2H), 7.10–7.18 (m, 2H), 7.54 (d, *J* = 7.6 Hz, 2H), 7.73 (td, *J* = 1.2,

7.6 Hz, 2H), 7.85 (d,  $J = 8.4$  Hz, 2H), 8.51 (d,  $J = 4.8$  Hz, 2H).  $^{13}\text{C}$  NMR (99 MHz,  $\text{CDCl}_3$ ,  $\delta$ ): 28.8 (CH<sub>3</sub>), 100.3 (CH), 118.3 (CH), 120.6 (CH), 121.4 (CH), 123.8 (CH), 129.1 (CH), 133.0 (CH), 136.7 (CH), 144.6 (CH), 147.7 (C), 148.1 (CH), 168.6 (C), 184.5 (C). HRMS-EI ( $m/z$ ):  $[\text{M}+\text{Na}]^+$  calcd for  $\text{C}_{27}\text{H}_{23}\text{IrN}_2\text{O}_2\text{Na}$ , 621.1258; found, 621.1254.

**(4,4'-Di-*tert*-butyl-2,2'-bipyridine)bis[(2-pyridinyl)phenyl]iridium(III) Hexafluorophosphate**

**(6).**

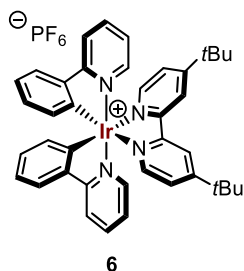

Chloride-bridged dimer **3a** (81.3 mg, 0.076 mmol), 4,4'-di-*tert*-butyl-2,2'-bipyridyl (85.0 mg, 0.32 mmol, 4.2 equiv), ethylene glycol (0.20  $\mu\text{L}/\text{mg}$ ) were placed in a ball milling vessel (stainless, 1.5 mL) loaded with one grinding ball (stainless, diameter: 5 mm). After being closed, the vessel placed in the ball mill machine (Retsch MM400, 60 min at 30 Hz) with a heat gun (the preset temperature at 300 °C). After ball milling, the jar was then cooled rapidly with cold water and opened. The mixture was extracted with  $\text{Et}_2\text{O}$  three times and the mixture was evaporated under vacuum. Then the mixture was dissolved in saturated  $\text{KPF}_6$  aqueous solution and stirred for 1 hour at room temperature. The surry solution was filtered to give the desired product **6** as a red powder (119.9 mg, 0.131 mmol, 88% yield).

$^1\text{H}$  NMR (401 MHz,  $\text{CDCl}_3$ ,  $\delta$ ): 1.45 (s, 18H), 6.29 (d,  $J = 7.2$  Hz, 2H), 6.89 (t,  $J = 7.0$  Hz, 2H), 7.01 (t,  $J = 7.2$  Hz, 2H), 7.11 (s, 2H), 7.38 (d,  $J = 4.4$  Hz, 2H), 7.59 (s, 2H), 7.67 (d,  $J = 7.2$  Hz, 2H), 7.73–7.86 (m, 4H), 7.90 (d,  $J = 6.8$  Hz, 2H), 8.58 (s, 2H).  $^{13}\text{C}$  NMR (100 MHz,  $\text{CDCl}_3$ ,  $\delta$ ): 30.5 (CH<sub>3</sub>), 35.7 (C), 119.4 (CH), 122.4 (CH), 123.6 (CH), 124.6 (CH), 125.3 (CH), 130.6 (CH), 131.7 (CH), 138.0 (CH), 143.6 (C), 149.4 (CH), 149.7 (CH), 150.8 (C), 155.7 (C), 164.0 (C), 167.6 (C). HRMS-EI ( $m/z$ ):  $[\text{M}-\text{PF}_6]^+$  calcd for  $\text{C}_{40}\text{H}_{40}\text{N}_4\text{Ir}$ , 767.2853; found, 767.2844.

## 9. References.

1. Anuradha, S.; Kip, T.; Megan, K.; Kariate, S. P.; Sadagopan, K.; Jimmie, D. W. *J. Org. Chem.* **776**, 51–59 (2015).
2. Seo, T.; Toyoshima, N; Kubota, K.; Ito, H. *J. Am. Chem. Soc.* **143**, 6165–6175 (2021).
3. Tamayo, A. B.; Alleyne, B. D.; Djurovich, P. I.; Lamansky, S.; Tsyba, I.; Ho, N. N.; Bau, R.; Thompson, M. E. *J. Am. Chem. Soc.* **125**, 7377–7387 (2003).

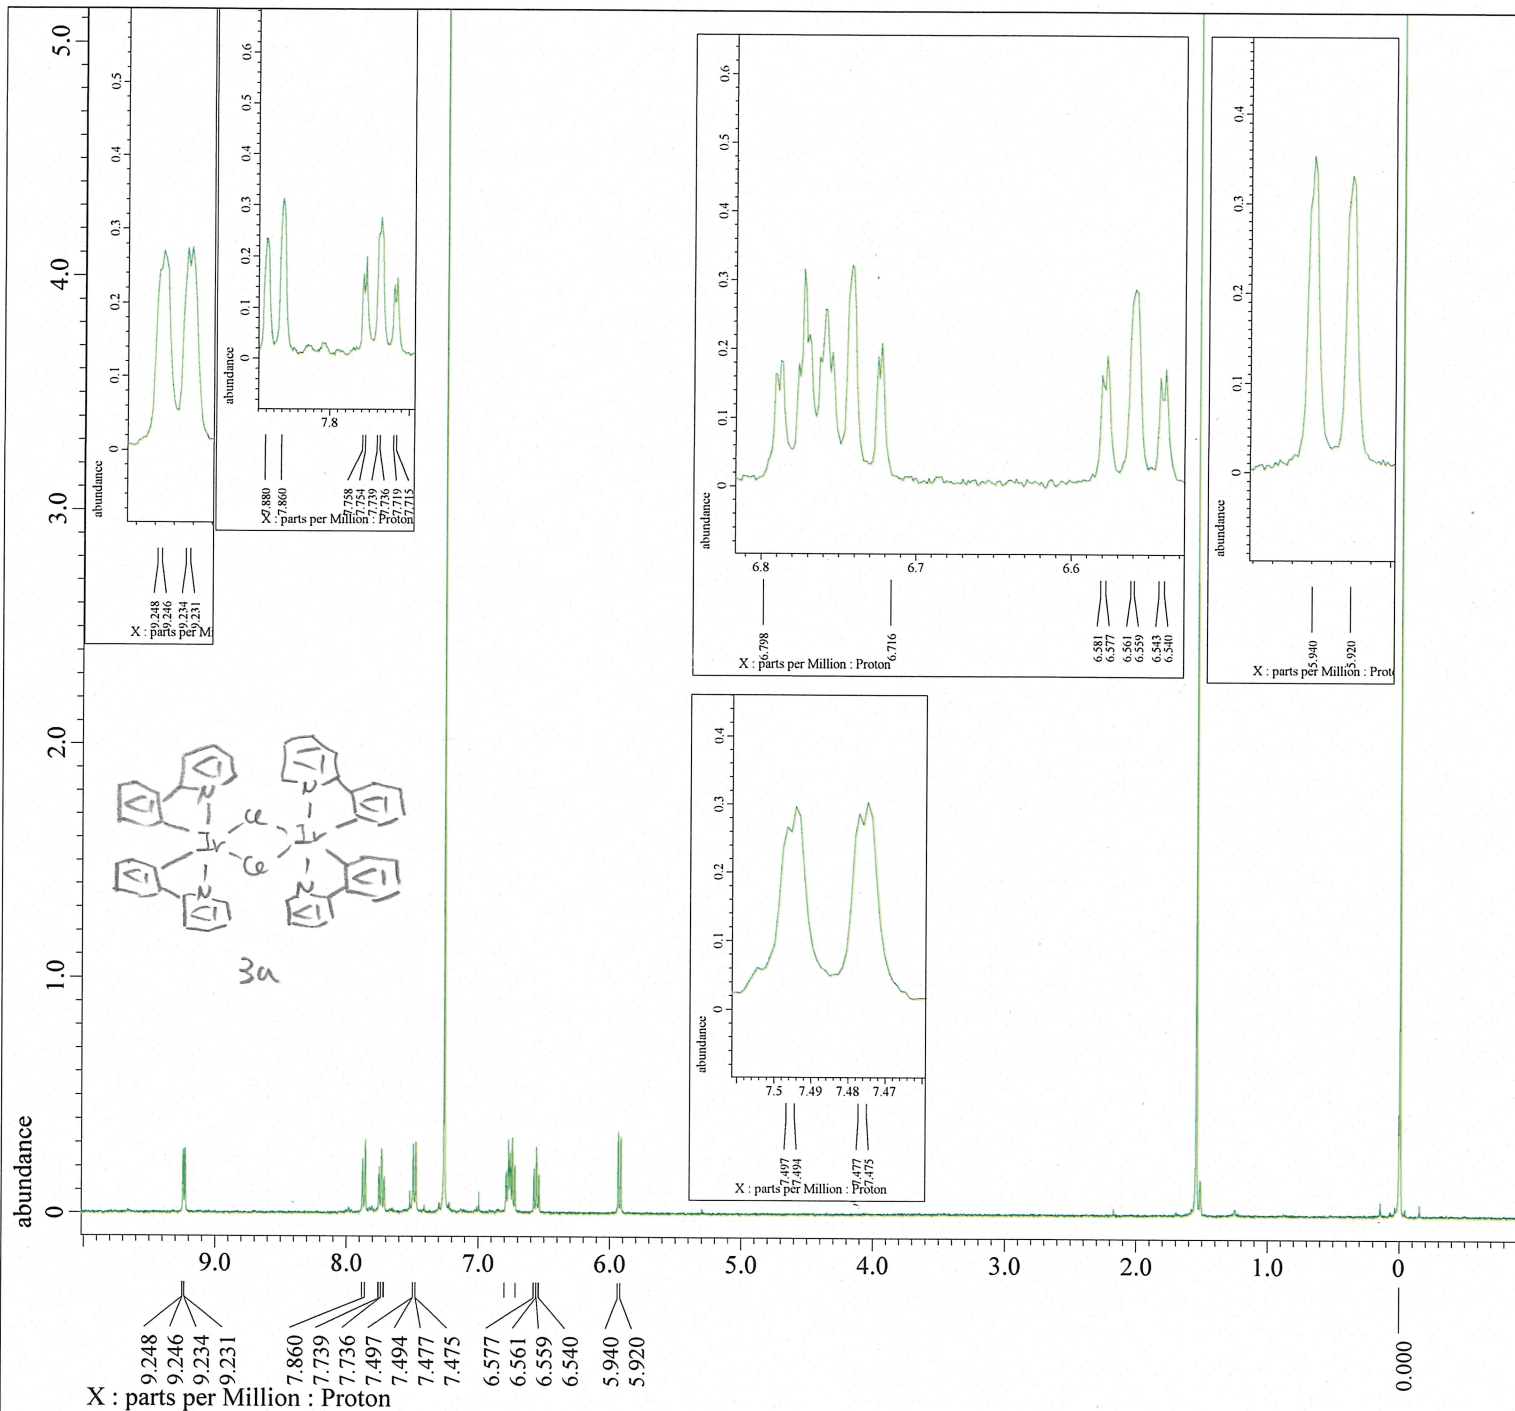

```

---- PROCESSING PARAMETERS ----
dc balance( 0, FALSE )
sexp( 0.2[Hz], 0.0[s] )
trapezoid( 0[%], 0[%], 80[%], 100[%] )
zerofill( 1 )
fft( 1, TRUE, TRUE )
machinephase
ppm

Derived from: TBR711-paper_Proton-1-1.jdf

```

```

Filename      = TBR711-paper_Proton-1-2.j
Author       = element
Experiment   = proton.jxp
Sample_Id    = TBR711-paper
Solvent      = CHLOROFORM-D
Actual_Start_Time = 14-MAR-2023 14:07:47
Revision_Time   = 14-MAR-2023 14:18:09

Comment      = single_pulse
Data Format   = 1D COMPLEX
Dim_Size     = 13107
X_Domain     = Proton
Dim_Title    = Proton
Dim_Units    = [ppm]
Dimensions   = X
Site         = JNM-ECS400
Spectrometer = DELTA2_NMR

```

```

Field Strength = 9.37221[T] (400[MHz])
X_Acq_Duration = 2.1889024[s]
X_Domain       = 1H
X_Freq         = 399.03472754[MHz]
X_Offset       = 5.0[ppm]
X_Points       = 16384
X_Prescans     = 1
X_Resolution   = 0.45684997[Hz]
X_Sweep        = 7.48502994[kHz]
X_Sweep_Clipped = 5.98802395[kHz]
Irr_Domain     = Proton
Irr_Freq       = 399.03472754[MHz]
Irr_Offset     = 5.0[ppm]
Tri_Domain     = Proton
Tri_Freq       = 399.03472754[MHz]
Tri_Offset     = 5.0[ppm]
Clipped        = FALSE
Scans          = 8
Total_Scans    = 8

Relaxation_Delay = 5[s]
Recvr_Gain       = 54
Temp_Get         = 19.4[dC]
X_90_Width      = 6.6[us]
X_Acq_Time      = 2.1889024[s]
X_Angle         = 45[deg]
X_Atn           = 1[dB]
X_Pulse         = 3.3[us]
Irr_Mode        = Off
Tri_Mode        = Off
Dante_Presat    = FALSE
Initial_Wait    = 1[s]
Repetition_Time = 7.1889024[s]

```

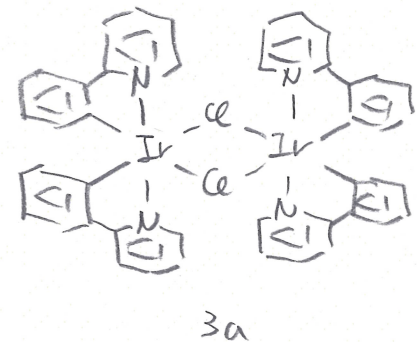

```

---- PROCESSING PARAMETERS ----
dc_balance( 0, FALSE )
sexp( 2.0[Hz], 0.0[s] )
trapezoid3( 0[%], 80[%], 100[%] )
zerofill( 1 )
fft( 1, TRUE, TRUE )
machinephase
ppm

Derived from: TBR711-C-1.jdf
  
```

```

Filename      = TBR711-C-2.jdf
Author       = element
Experiment    = single_pulse_dec
Sample_Id     = 1
Solvent      = CHLOROFORM-D
Actual_Start_Time = 8-MAR-2023 05:50:43
Revision_Time = 14-MAR-2023 16:15:39

Comment      = single pulse decoupled ga
Data Format   = 1D COMPLEX
Dim_Size     = 26214
X_Domain     = 13C
Dim_Title    = 13C
Dim_Units    = [ppm]
Dimensions   = X
Site         = ECS 400
Spectrometer = JNM-ECS400
  
```

```

Field_Strength = 9.20197068[T] (390[MHz])
X_Acq_Duration = 1.06430464[s]
X_Domain       = 13C
X_Freq         = 98.51479726[MHz]
X_Offset       = 100[ppm]
X_Points       = 32768
X_Prescans     = 4
X_Resolution   = 0.93958061[Hz]
X_Sweep        = 30.78817734[kHz]
Irr_Domain     = 1H
Irr_Freq       = 391.78655441[MHz]
Irr_Offset     = 5[ppm]
Clipped        = FALSE
Scans          = 10248
Total_Scans    = 10248
  
```

```

Relaxation_Delay = 2[s]
Recvr_Gain       = 60
Temp_Get         = 20[dC]
X_90_Width      = 8.3[us]
X_Acq_Time       = 1.06430464[s]
X_Angle         = 30[deg]
X_Atn           = 4.9[dB]
X_Pulse         = 2.76666667[us]
Irr_Atn_Dec     = 22.45[dB]
Irr_Atn_No     = 22.45[dB]
Irr_Noise       = WALTZ
Decoupling      = TRUE
Initial_Wait    = 1[s]
Noe              = TRUE
Noe_Time        = 2[s]
Repetition_Time = 3.06430464[s]
  
```

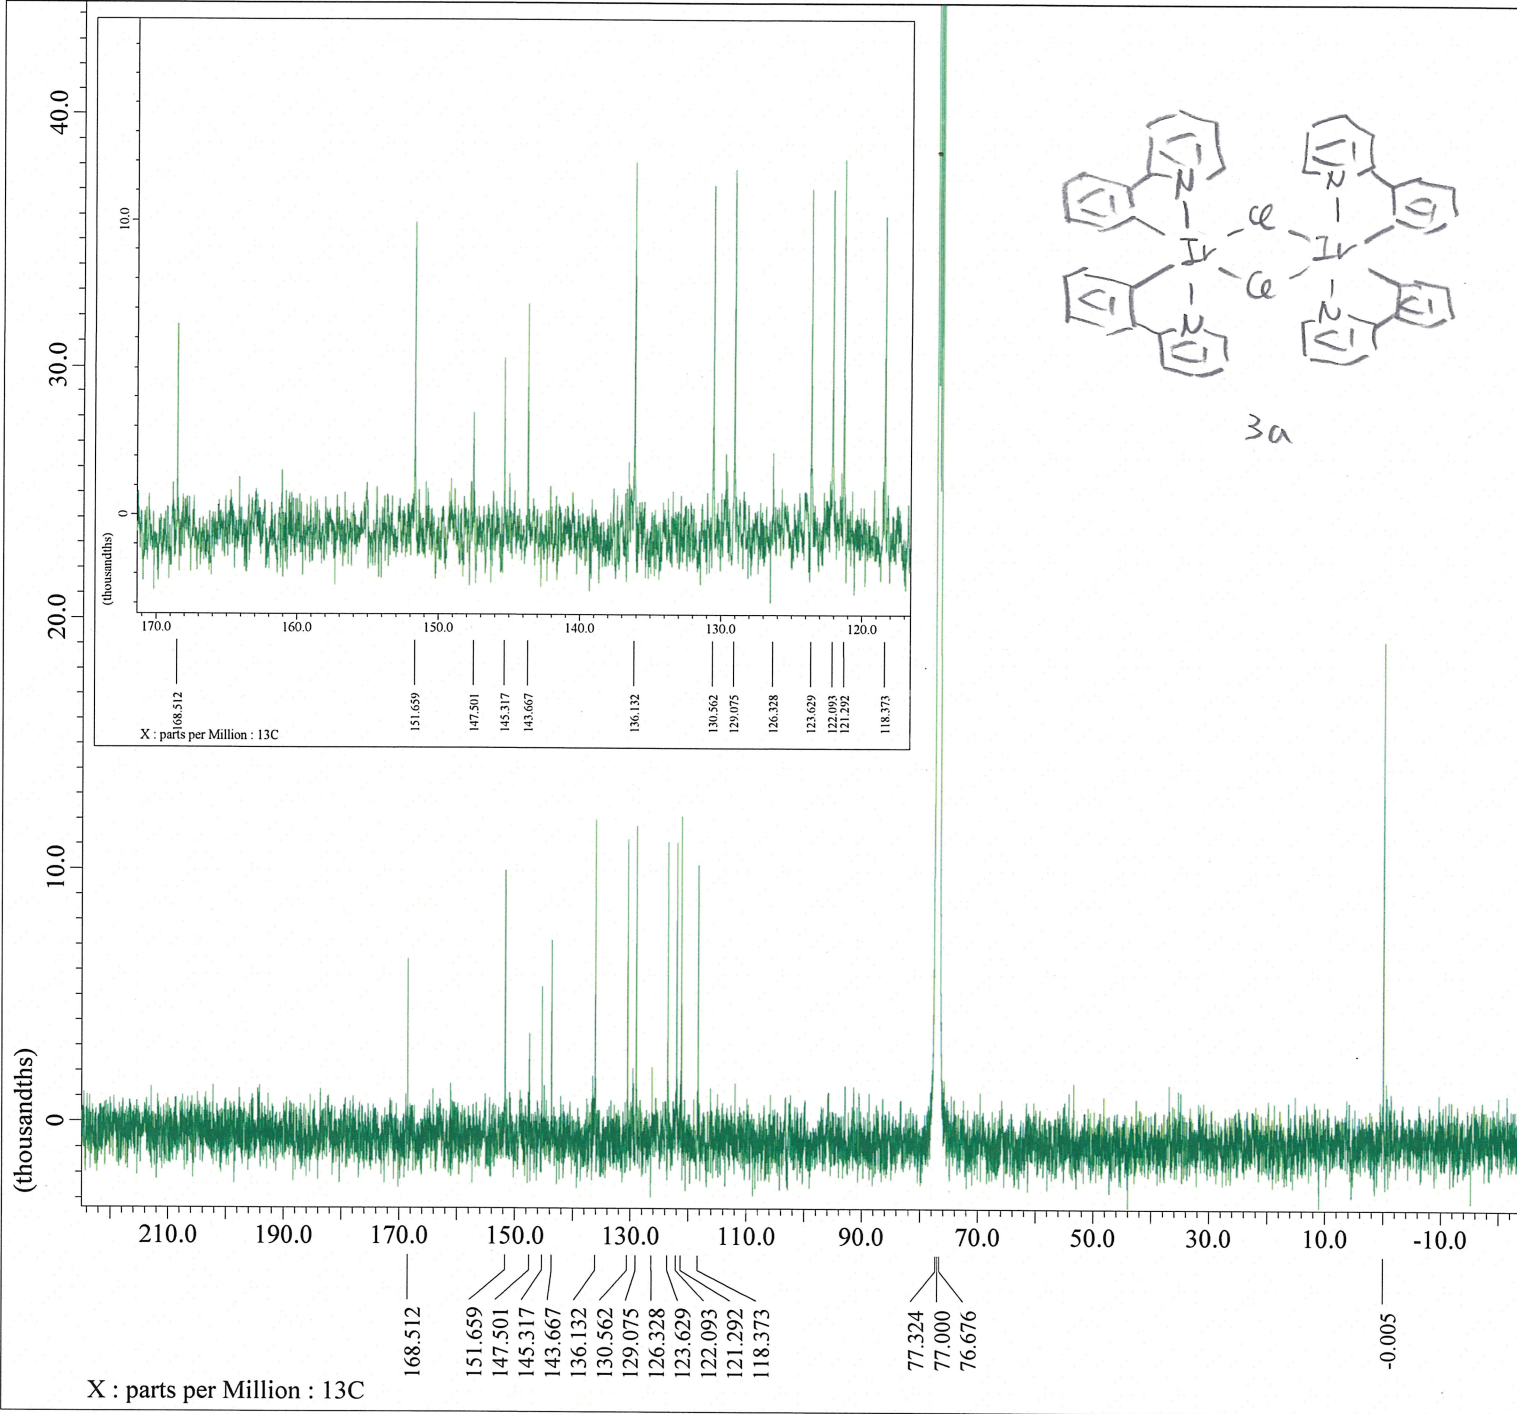

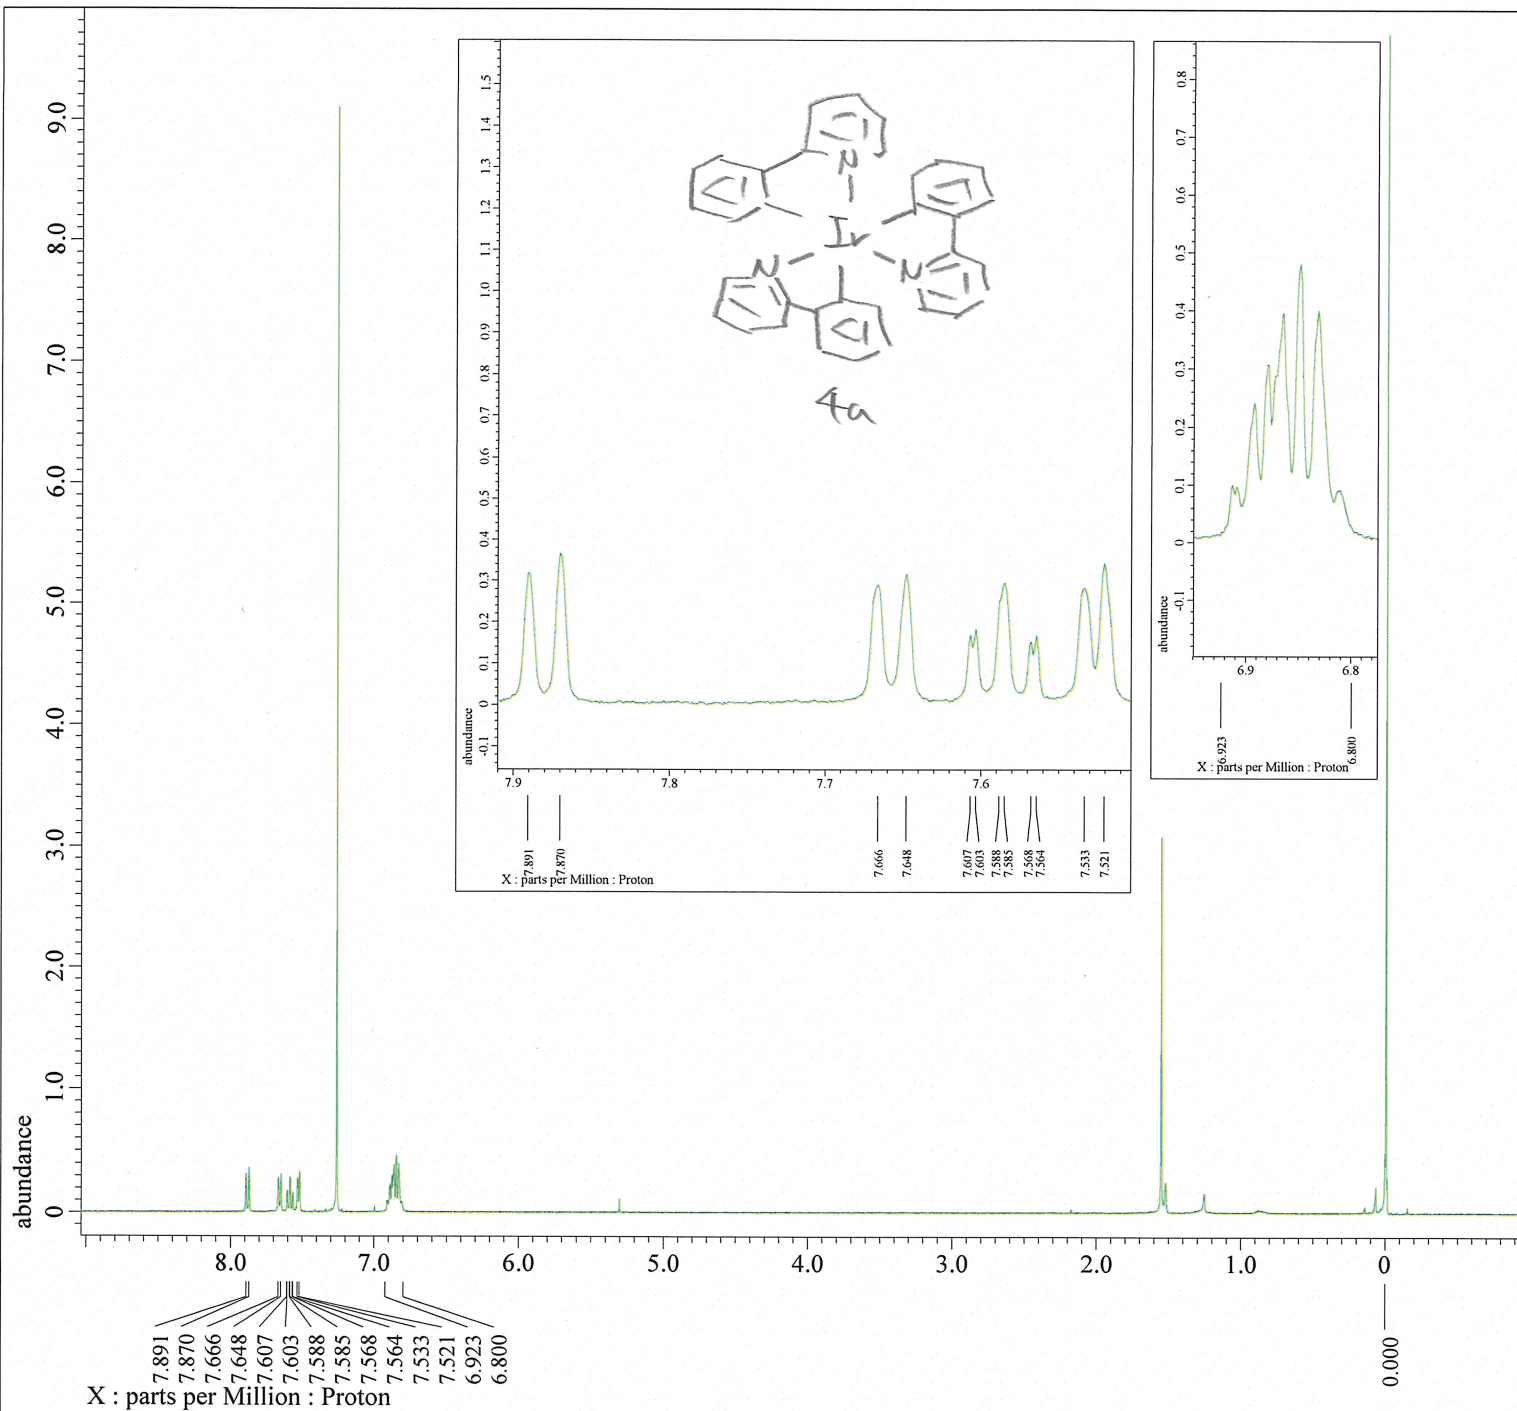

```

---- PROCESSING PARAMETERS ----
dc_balance( 0, FALSE )
sexp( 0.2[Hz], 0.0[s] )
trapezoid( 0[%], 0[%], 80[%], 100[%] )
zeroFill( 1 )
fft( 1, TRUE, TRUE )
machinephase
ppm

Derived from: TBR718_Proton-1-1.jdf

Filename      = TBR718_Proton-1-3.jdf
Author       = element
Experiment   = proton.jxp
Sample Id    = TBR718
Solvent      = CHLOROFORM-D
Actual_Start Time = 10-MAR-2023 10:53:31
Revision_Time = 14-MAR-2023 13:50:44

Comment      = single_pulse
Data Format   = 1D COMPLEX
Dim Size     = 13107
X_Domain     = Proton
Dim Title    = Proton
Dim Units    = [ppm]
Dimensions   = X
Spectrometer = DELTA2_NMR

Field Strength = 9.4073814[T] (400[MHz])
X_Acq_Duration = 2.18103808[s]
X_Domain       = 1H
X_Freq         = 400.53219825[MHz]
X_Offset       = 5[ppm]
X_Points       = 16384
X_Prescans     = 1
X_Resolution  = 0.45849727[Hz]
X_Sweep        = 7.51201923[kHz]
X_Sweep_Clippped = 6.00961538[kHz]
Irr_Domain     = Proton
Irr_Freq       = 400.53219825[MHz]
Irr_Offset     = 5[ppm]
Tri_Domain     = Proton
Tri_Freq       = 400.53219825[MHz]
Tri_Offset     = 5[ppm]
Clipped        = FALSE
Scans          = 8
Total_Scans    = 8

Relaxation_Delay = 5[s]
Recvr_Gain       = 50
Temp_Get         = 19.1[dC]
X_90_Width      = 6.7[us]
X_Acq_Time      = 2.18103808[s]
X_Angle         = 45[deg]
X_Atn           = 0.8[dB]
X_Pulse         = 3.35[us]
Irr_Mode        = Off
Tri_Mode        = Off
Dante_Presat    = FALSE
Initial_Wait    = 1[s]
Repetition_Time = 7.18103808[s]

```

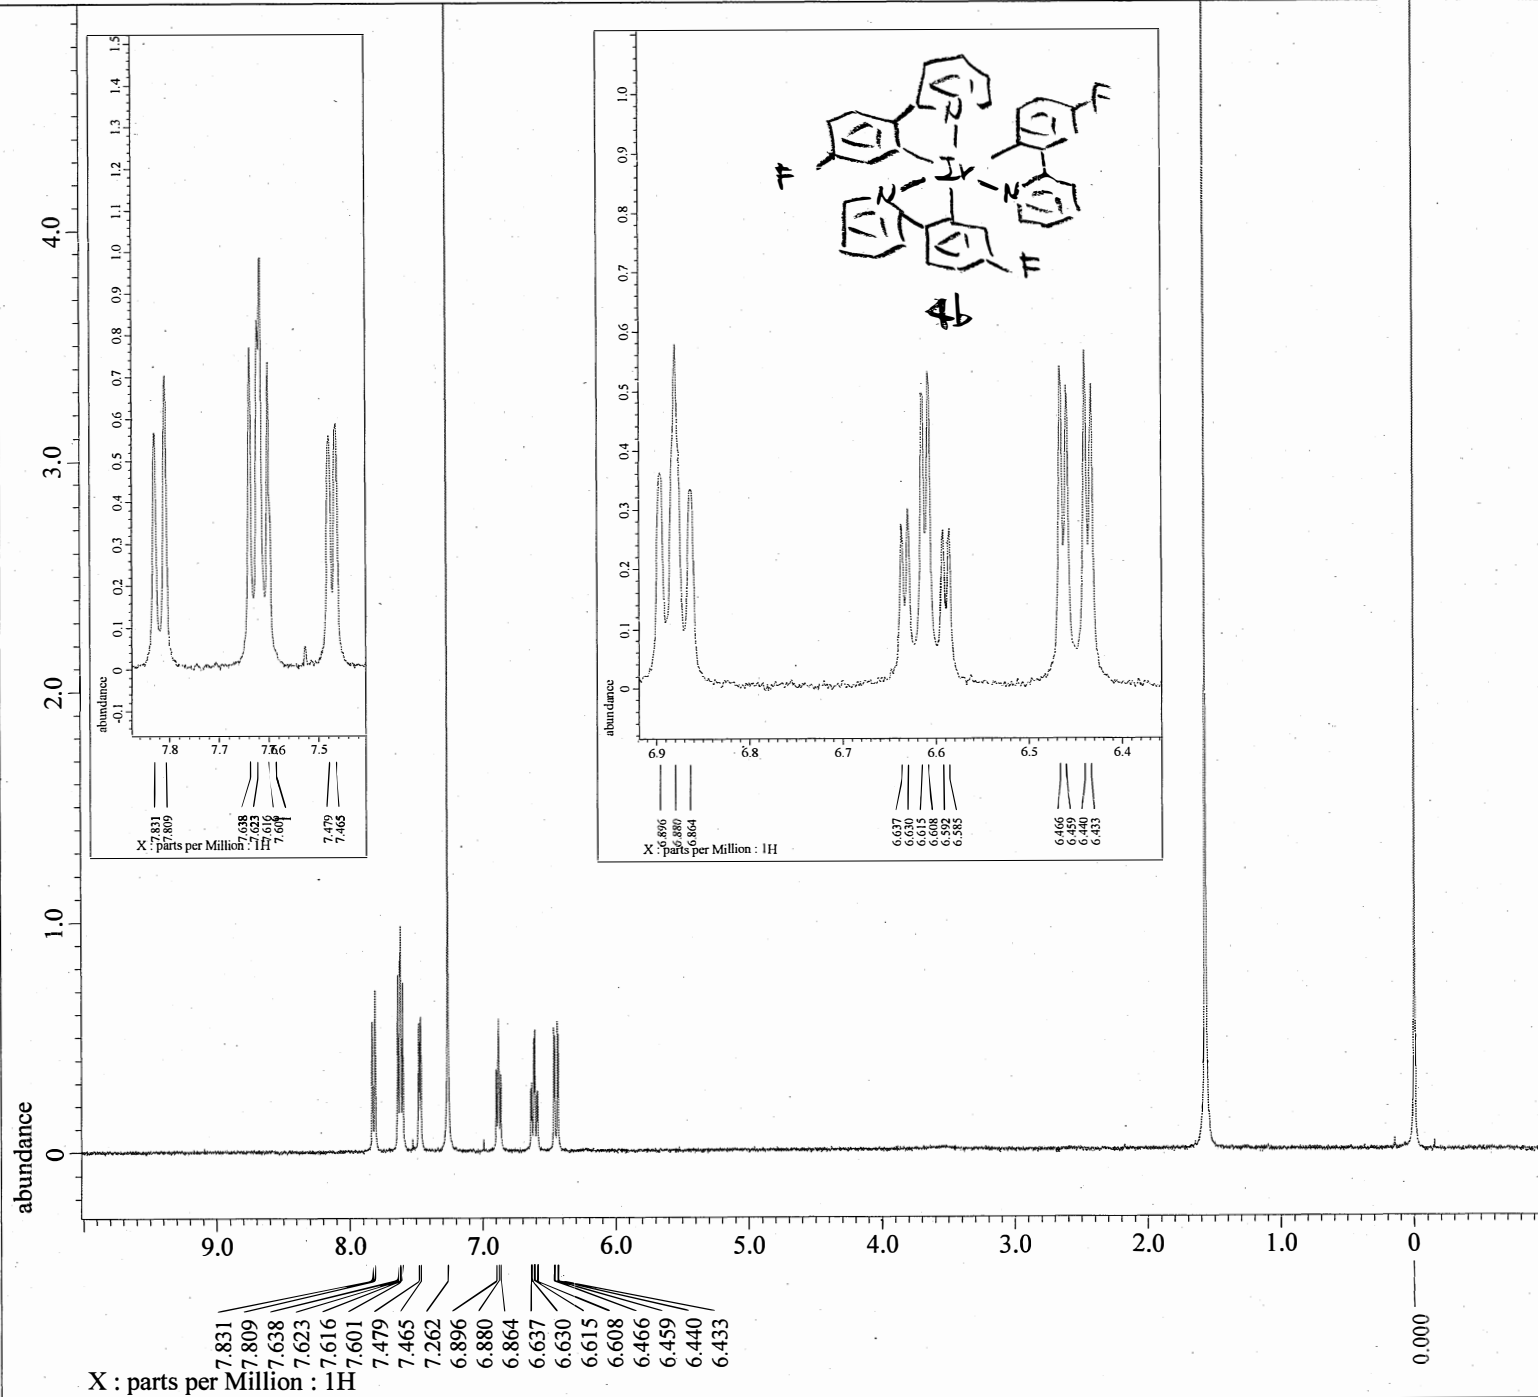

```

---- PROCESSING PARAMETERS ----
dc balance( 0, FALSE )
sexp( 0.2[Hz], 0.0[s] )
trapezoid3( 0[%], 80[%], 100[%] )
zerofill( 1, TRUE )
fft( 1, TRUE, TRUE )
machinephase
ppm

```

以下に由来: TBR252-retry-1.jdf

```

Filename      = TBR252-retry-3.jdf
Author        = element
Experiment    = single_pulse.ex2
Sample_Id     = 1
Solvent       = CHLOROFORM-D
Actual_Start_Time = 13-OCT-2022 03:45:35
Revision_Time = 14-OCT-2022 21:25:34

```

```

Comment       = single_pulse
Data_Format   = 1D COMPLEX
Dim_Size      = 13107
X_Domain      = 1H
Dim_Title     = 1H
Dim_Units     = [ppm]
Dimensions    = X
Site          = ECS 400
Spectrometer  = JNM-ECS400

```

```

Field_Strength = 9.20197068[T] (390[MHz])
X_Acq_Duration = 2.228224[s]
X_Domain       = 1H
X_Freq         = 391.78655441[MHz]
X_Offset       = 5[ppm]
X_Points       = 16384
X_Prescans     = 1
X_Resolution   = 0.44878791[Hz]
X_Sweep        = 7.35294118[kHz]
Irr_Domain     = 1H
Irr_Freq       = 391.78655441[MHz]
Irr_Offset     = 5[ppm]
Tri_Domain     = 1H
Tri_Freq       = 391.78655441[MHz]
Tri_Offset     = 5[ppm]
Clipped        = FALSE
Scans          = 8
Total_Scans    = 8

```

```

Relaxation_Delay = 5[s]
Recvr_Gain       = 58
Temp_Get         = 17.7[dc]
X_90_Width       = 10.8[us]
X_Acq_Time       = 2.228224[s]
X_Angle          = 45[deg]
X_Atn            = 1.9[db]
X_Pulse          = 5.4[us]
Irr_Mode         = Off
Tri_Mode         = Off
Dante_Presat     = FALSE

```

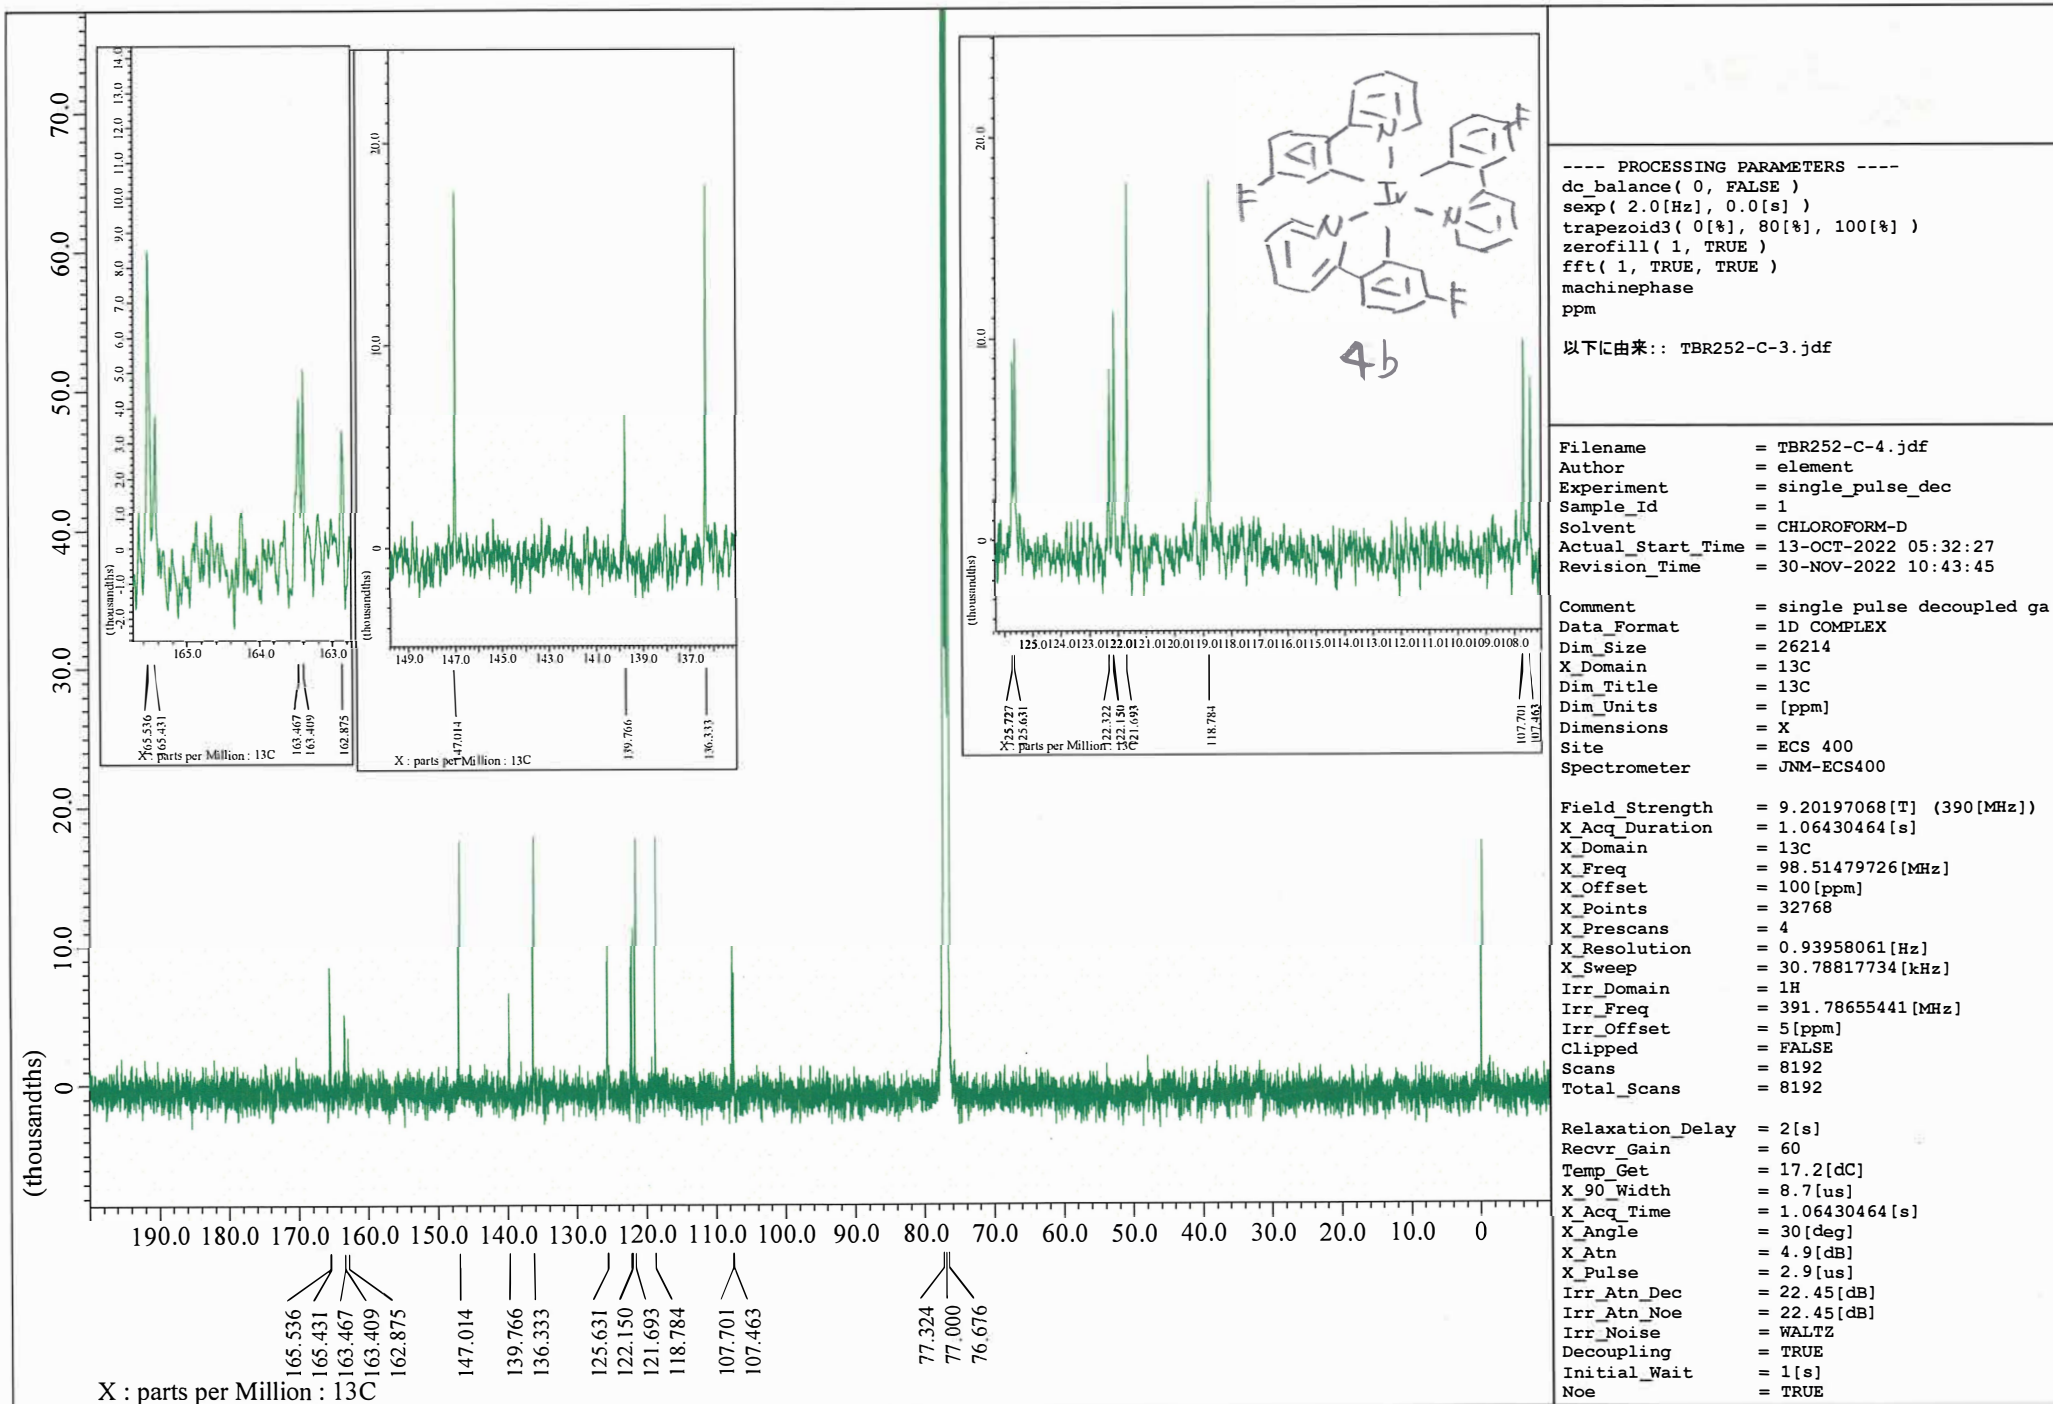



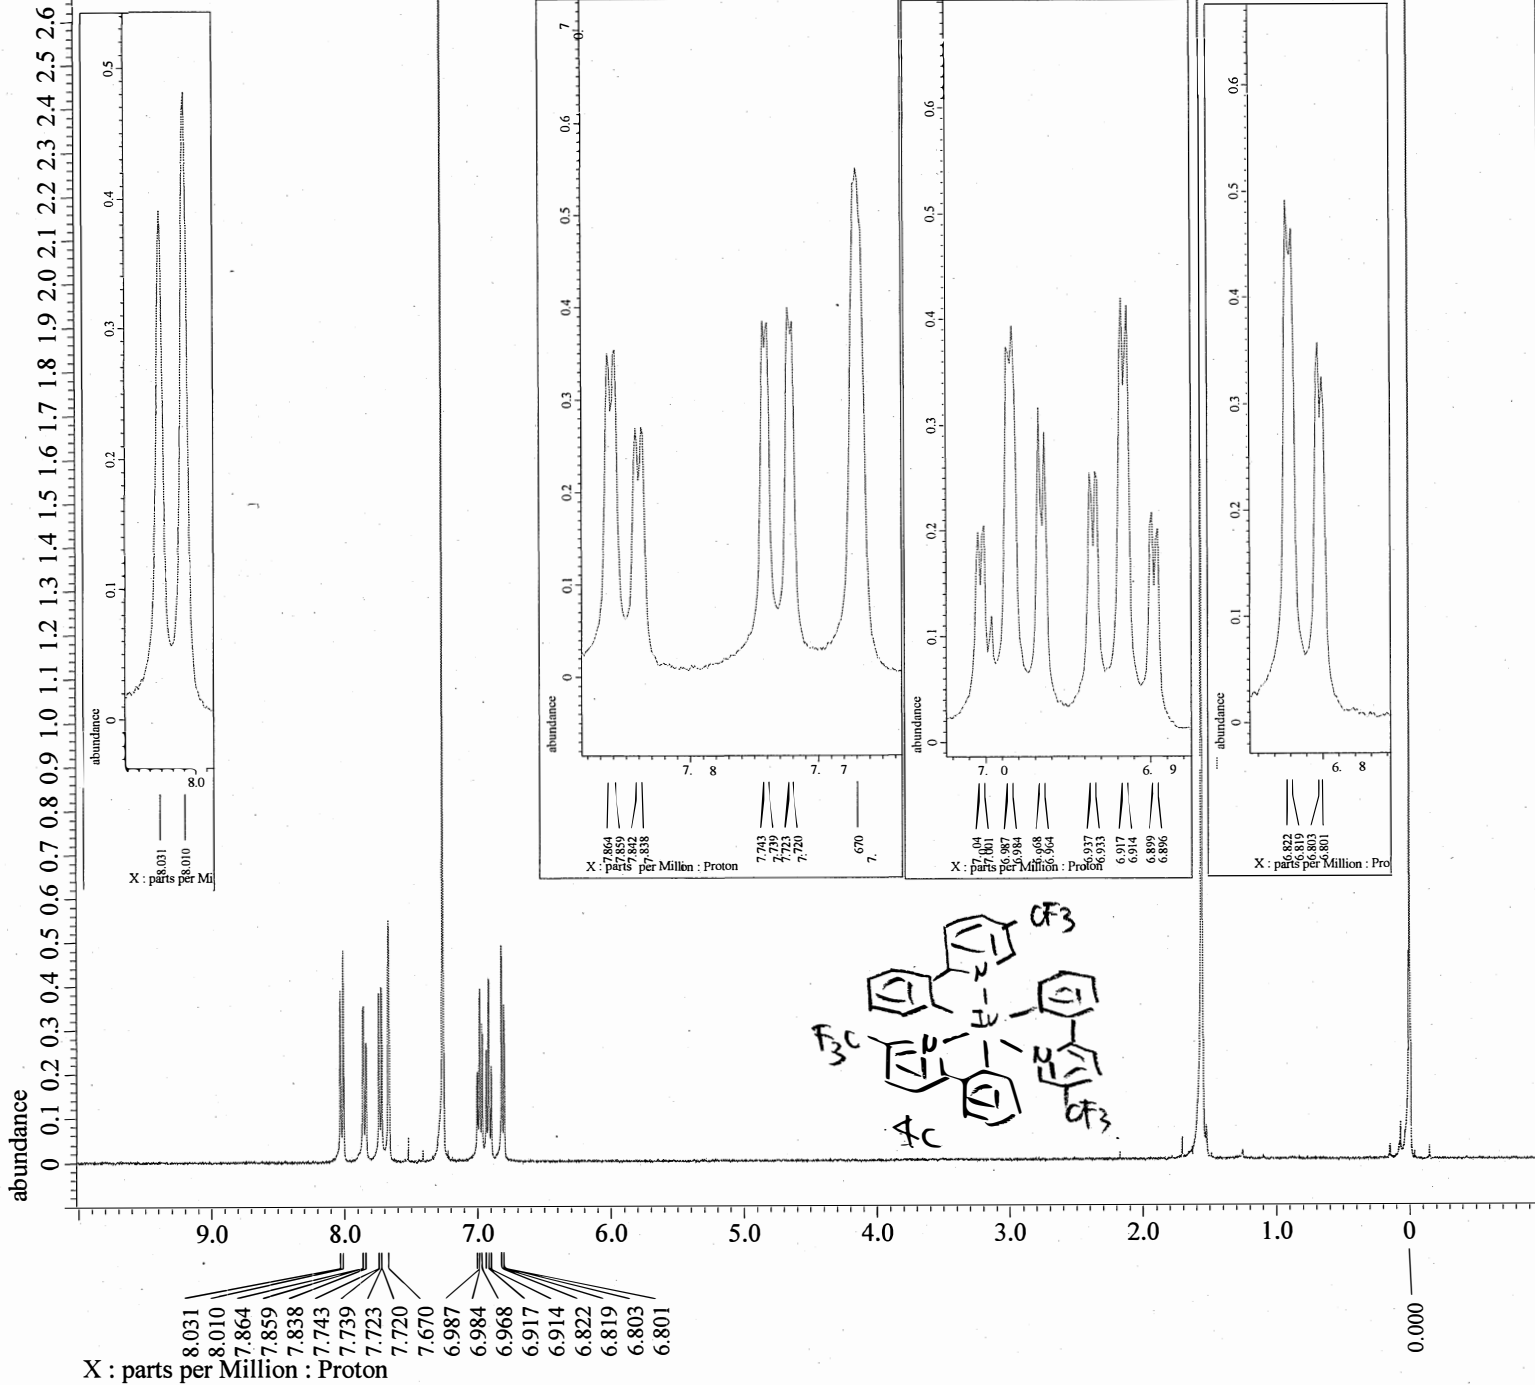

```

---- PROCESSING PARAMETERS ----
dc_balance( 0, FALSE )
sexp( 0.2[Hz], 0.0[s] )
trapezoid( 0[%], 0[%], 80[%], 100[%] )
zerofill( 1, TRUE )
fft( 1, TRUE, TRUE )
machinephase
ppm

以下に由来: TBR336-re_Proton-1-1.jdf

Filename      = TBR336-re_Proton-1-2.jdf
Author        = element
Experiment    = proton.jxp
Sample Id     = TBR336-re
Solvent       = CHLOROFORM-D
Actual Start Time = 14-OCT-2022 19:08:07
Revision Time  = 17-OCT-2022 17:19:09

Comment       = single_pulse
Data Format    = 1D_COMPLEX
Dim Size      = 13107
X Domain      = Proton
Dim Title     = Proton
Dim Units     = [ppm]
Dimensions    = X
Site          = JNM-ECS400
Spectrometer  = DELTA2_NMR

Field Strength = 9.37221[T] (400[MHz])
X_Acq_Duration = 2.1889024[s]
X_Domain       = 1H
X_Freq        = 399.03472754[MHz]
X_Offset      = 5.0[ppm]
X_Points      = 16384
X_Prescans    = 1
X_Resolution  = 0.45684997[Hz]
X_Sweep       = 7.48502994[kHz]
X_Sweep_Clippped = 5.98802395[kHz]
Irr_Domain    = Proton
Irr_Freq      = 399.03472754[MHz]
Irr_Offset    = 5.0[ppm]
Tri_Domain    = Proton
Tri_Freq      = 399.03472754[MHz]
Tri_Offset    = 5.0[ppm]
Clipped       = FALSE
Scans         = 8
Total Scans   = 8

Relaxation_Delay = 5[s]
Recvr_Gain       = 48
Temp_Get        = 21.3[dc]
X_90_Width      = 6.6[us]
X_Acq_Time      = 2.1889024[s]
X_Angle         = 45[deg]
X_Atn           = 1[db]
X_Pulse        = 3.3[us]
Irr_Mode        = Off
Tri_Mode        = Off
  
```

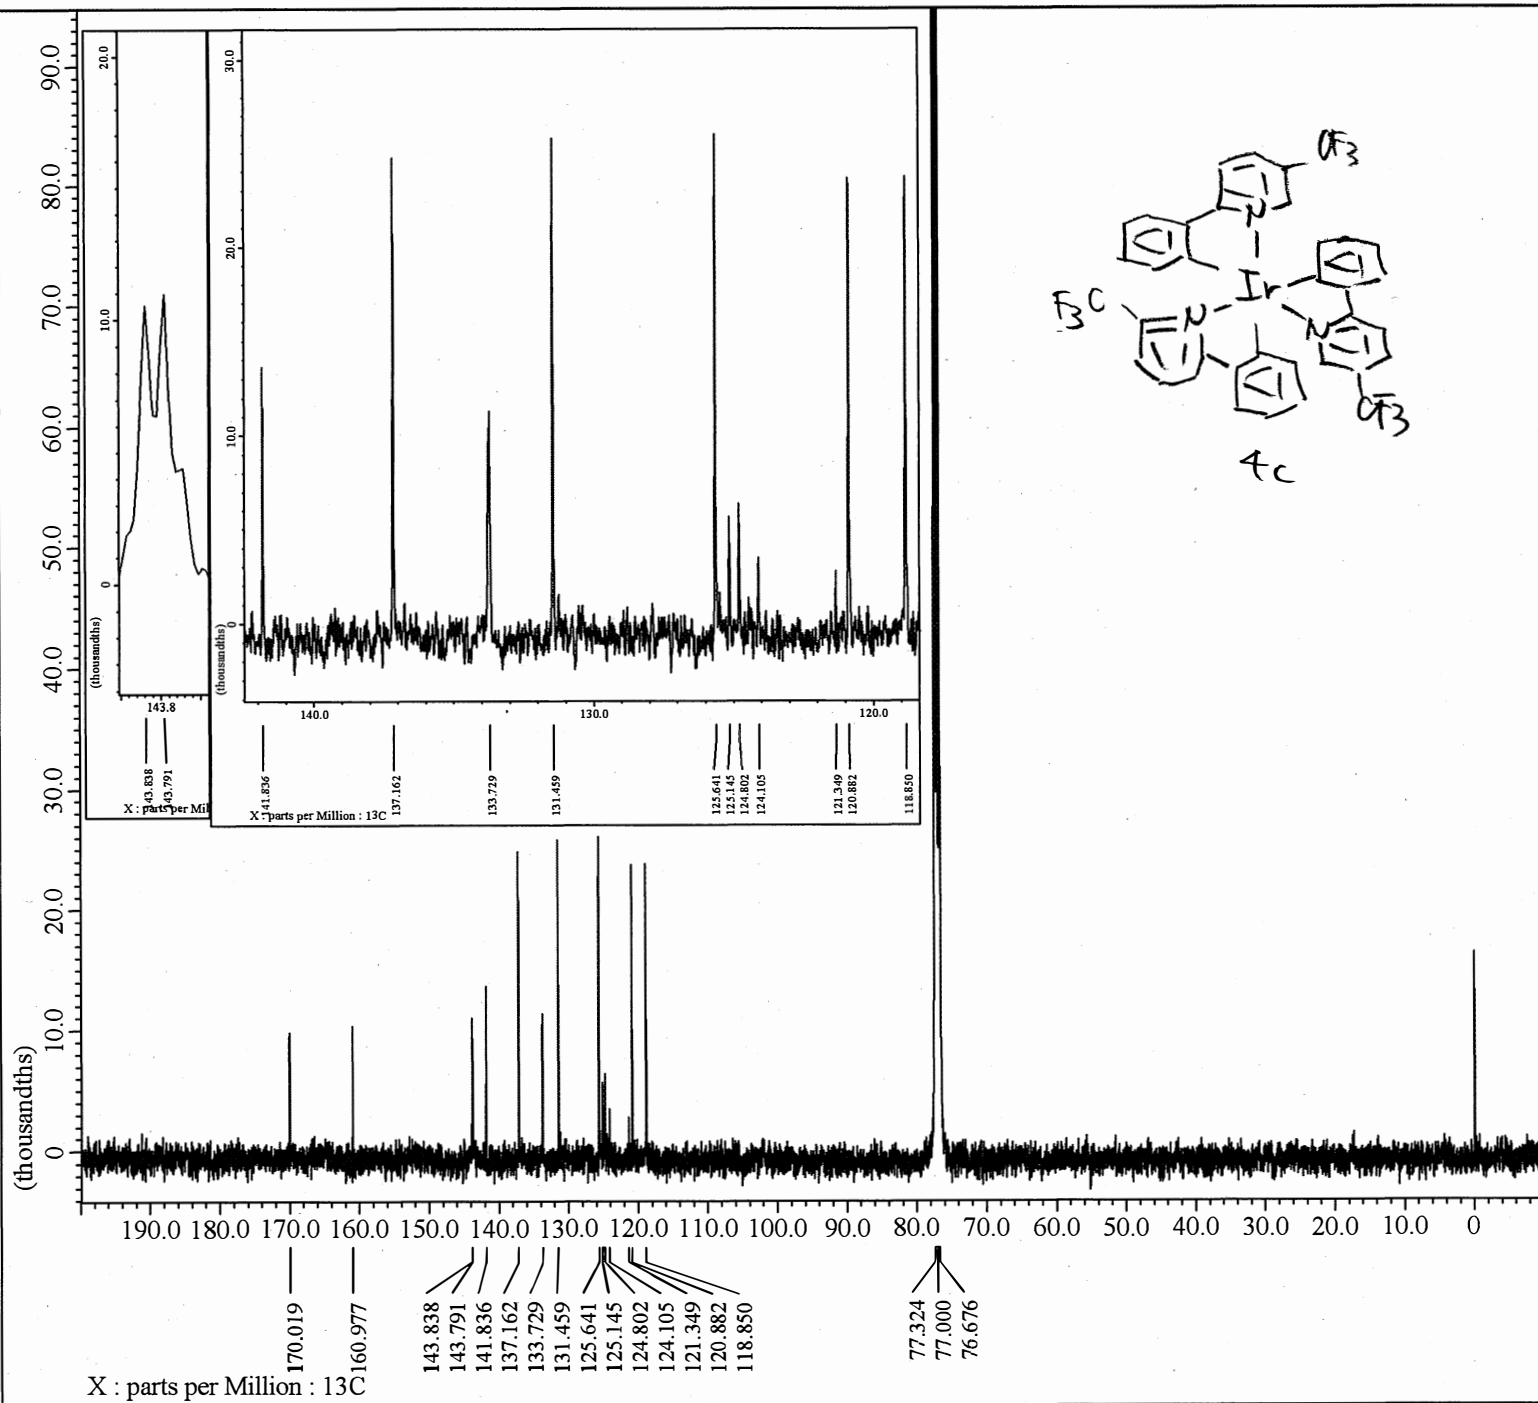

```

---- PROCESSING PARAMETERS ----
dc_balance( 0, FALSE )
sexp( 2.0[Hz], 0.0[s] )
trapezoid3( 0[%], 80[%], 100[%] )
zerofill( 1, TRUE )
fft( 1, TRUE, TRUE )
machinephase
ppm

以下に由来: TBR336-C-1.jdf

```

```

Filename      = TBR336-C-2.jdf
Author       = element
Experiment    = single_pulse_dec
Sample_Id     = 1
Solvent      = CHLOROFORM-D
Actual_Start_Time = 15-OCT-2022 03:46:46
Revision_Time = 30-NOV-2022 11:01:36

```

```

Comment       = single pulse decoupled ga
Data_Format   = 1D COMPLEX
Dim_Size      = 26214
X_Domain      = 13C
Dim_Title     = 13C
Dim_Units     = [ppm]
Dimensions    = X
Site          = ECS 400
Spectrometer  = JNM-ECS400

```

```

Field_Strength = 9.20197068[T] (390[MHz])
X_Acq_Duration = 1.06430464[s]
X_Domain       = 13C
X_Freq         = 98.51479726[MHz]
X_Offset       = 100[ppm]
X_Points       = 32768
X_Prescans     = 4
X_Resolution   = 0.93958061[Hz]
X_Sweep        = 30.78817734[kHz]
Irr_Domain     = 1H
Irr_Freq       = 391.78655441[MHz]
Irr_Offset     = 5[ppm]
Clipped        = FALSE
Scans          = 11264
Total_Scans    = 11264

```

```

Relaxation_Delay = 2[s]
Recur_gain       = 60
Temp_Get         = 19.9[dc]
X_90_Width      = 8.7[us]
X_Acq_Time       = 1.06430464[s]
X_Angle         = 30[deg]
X_Atn           = 4.9[db]
X_Pulse         = 2.9[us]
Irr_Atn_Dec     = 22.45[db]
Irr_Atn_No     = 22.45[db]
Irr_Noise       = WALTZ
Decoupling       = TRUE
Initial_Wait    = 1[s]
Noe              = TRUE

```

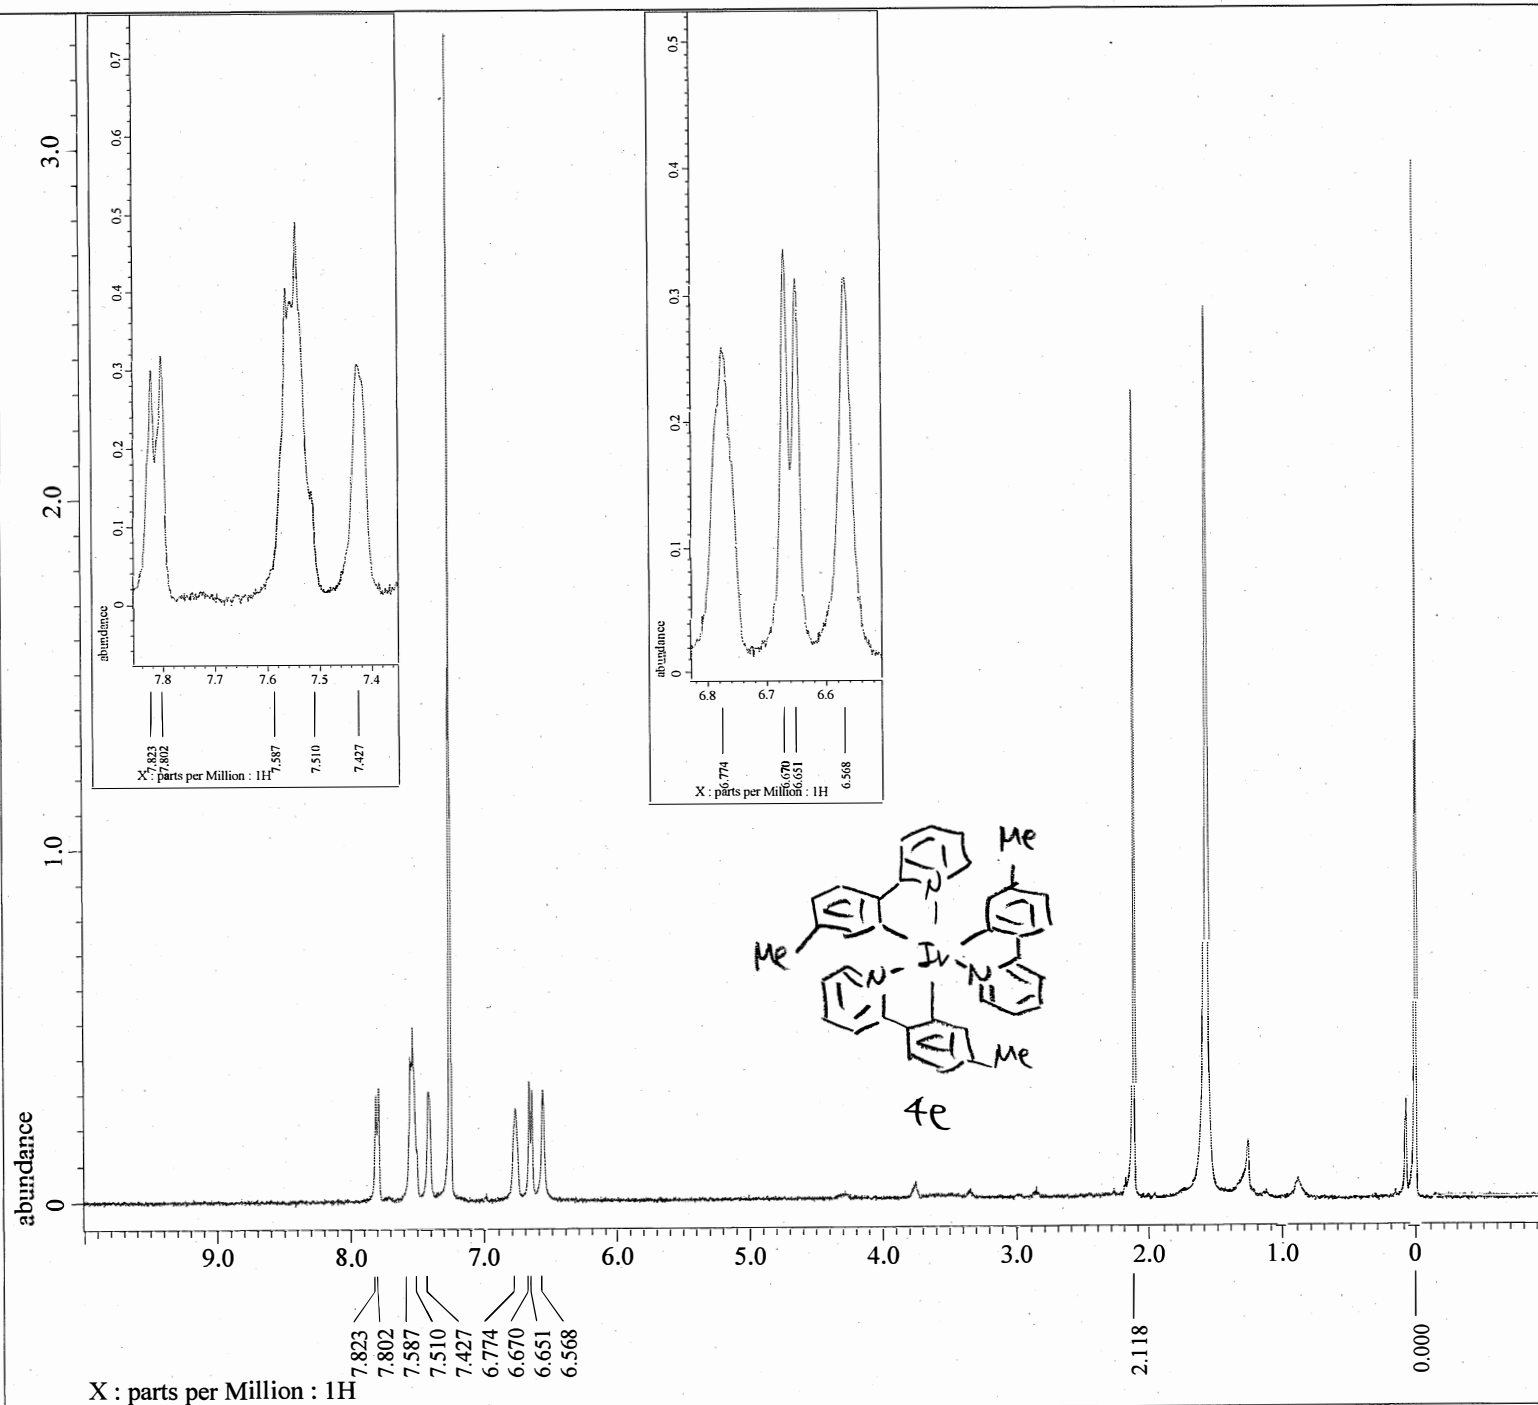

---- PROCESSING PARAMETERS ----  
 dc\_balance( 0, FALSE )  
 sexp( 0.2[Hz], 0.0[s] )  
 trapezoid3( 0[%], 80[%], 100[%] )  
 zerofill( 1, TRUE )  
 fft( 1, TRUE, TRUE )  
 machinephase  
 ppm

以下に由来: TBR375-redry-1.jdf

Filename = TBR375-redry-4.jdf  
 Author = element  
 Experiment = single\_pulse.ex2  
 Sample\_Id = S#524701  
 Solvent = CHLOROFORM-D  
 Actual\_Start\_Time = 17-OCT-2022 21:13:53  
 Revision\_Time = 18-OCT-2022 16:35:29

Comment = single\_pulse  
 Data\_Format = 1D\_COMPLEX  
 Dim\_Size = 13107  
 X\_Domain = 1H  
 Dim\_Title = 1H  
 Dim\_Units = [ppm]  
 Dimensions = X  
 Site = ECS 400  
 Spectrometer = JNM-ECS400

Field\_Strength = 9.20197068[T] (390[MHz])  
 X\_Acq\_Duration = 2.228224[s]  
 X\_Domain = 1H  
 X\_Freq = 391.78655441[MHz]  
 X\_Offset = 5[ppm]  
 X\_Points = 16384  
 X\_Prescans = 1  
 X\_Resolution = 0.44878791[Hz]  
 X\_Sweep = 7.35294118[kHz]  
 Irr\_Domain = 1H  
 Irr\_Freq = 391.78655441[MHz]  
 Irr\_Offset = 5[ppm]  
 Tri\_Domain = 1H  
 Tri\_Freq = 391.78655441[MHz]  
 Tri\_Offset = 5[ppm]  
 Clipped = FALSE  
 Scans = 8  
 Total\_Scans = 8

Relaxation\_Delay = 5[s]  
 Recvr\_Gain = 56  
 Temp\_Get = 19.6[dc]  
 X\_90\_Width = 10.8[us]  
 X\_Acq\_Time = 2.228224[s]  
 X\_Angle = 45[deg]  
 X\_Atn = 1.9[db]  
 X\_Pulse = 5.4[us]  
 Irr\_Mode = Off  
 Tri\_Mode = Off  
 Dante\_Presat = FALSE

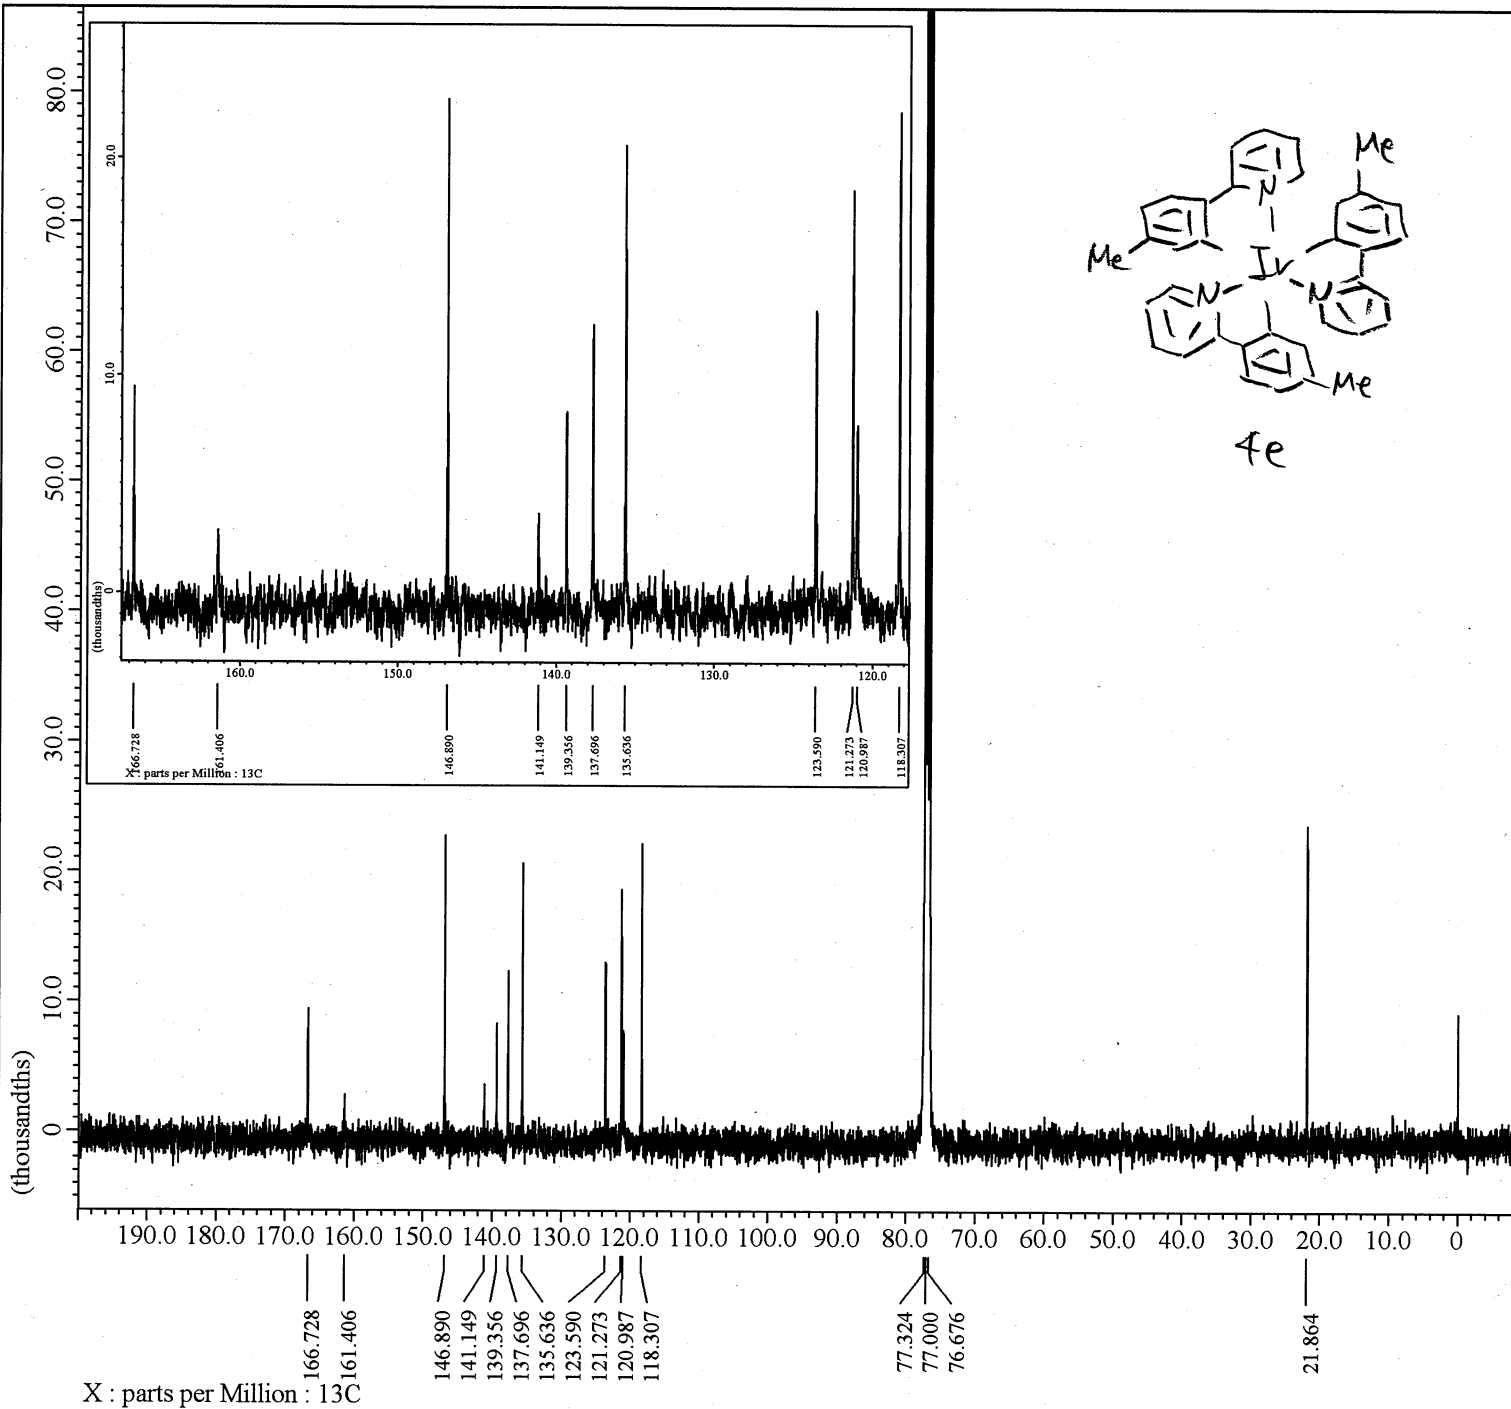

```

---- PROCESSING PARAMETERS ----
dc balance : 0 : FALSE
sexp : 2.0[Hz] : 0.0[s]
trapezoid3 : 0[%] : 80[%] : 100[%]
zerofill : 1
fft : 1 : TRUE : TRUE
machinephase
ppm

Derived from: TBR375-C-2.jdf

Filename      = TBR375-C-3.jdf
Author       = element
Experiment   = single_pulse_dec
Sample_Id    = 1
Solvent      = CHLOROFORM-D
Actual_Start Time = 24-OCT-2022 03:49:27
Revision_Time = 30-NOV-2022 11:16:50

Comment      = single pulse decoupled ga
Data_Format  = 1D COMPLEX
Dim_Size     = 26214
X_Domain     = 13C
Dim_Title    = 13C
Dim_Units    = [ppm]
Dimensions   = X
Site         = ECS 400
Spectrometer = JNM-ECS400

Field_Strength = 9.20197068[T] (390[MHz])
X_Acq_Duration = 1.06430464[s]
X_Domain       = 13C
X_Freq         = 98.51479726[MHz]
X_Offset       = 100[ppm]
X_Points       = 32768
X_Prescans     = 4
X_Resolution  = 0.93958061[Hz]
X_Sweep        = 30.78817734[kHz]
Irr_Domain     = 1H
Irr_Freq       = 391.78655441[MHz]
Irr_Offset     = 5[ppm]
Clipped        = FALSE
Scans          = 11264
Total_Scans    = 11264

Relaxation_Delay = 2[s]
Recvr_Gain       = 60
Temp_Get         = 17.5[dC]
X_90_Width      = 8.7[us]
X_Acq_Time       = 1.06430464[s]
X_Angle          = 30[deg]
X_Atn            = 4.9[dB]
X_Pulse         = 2.9[us]
Irr_Atn_Dec     = 22.45[dB]
Irr_Atn_No     = 22.45[dB]
Irr_Noise       = WALTZ
Decoupling      = TRUE
Initial_Wait    = 1[s]
Noe              = TRUE
Noe_Time        = 2[s]
Repetition_Time = 3.06430464[s]

```

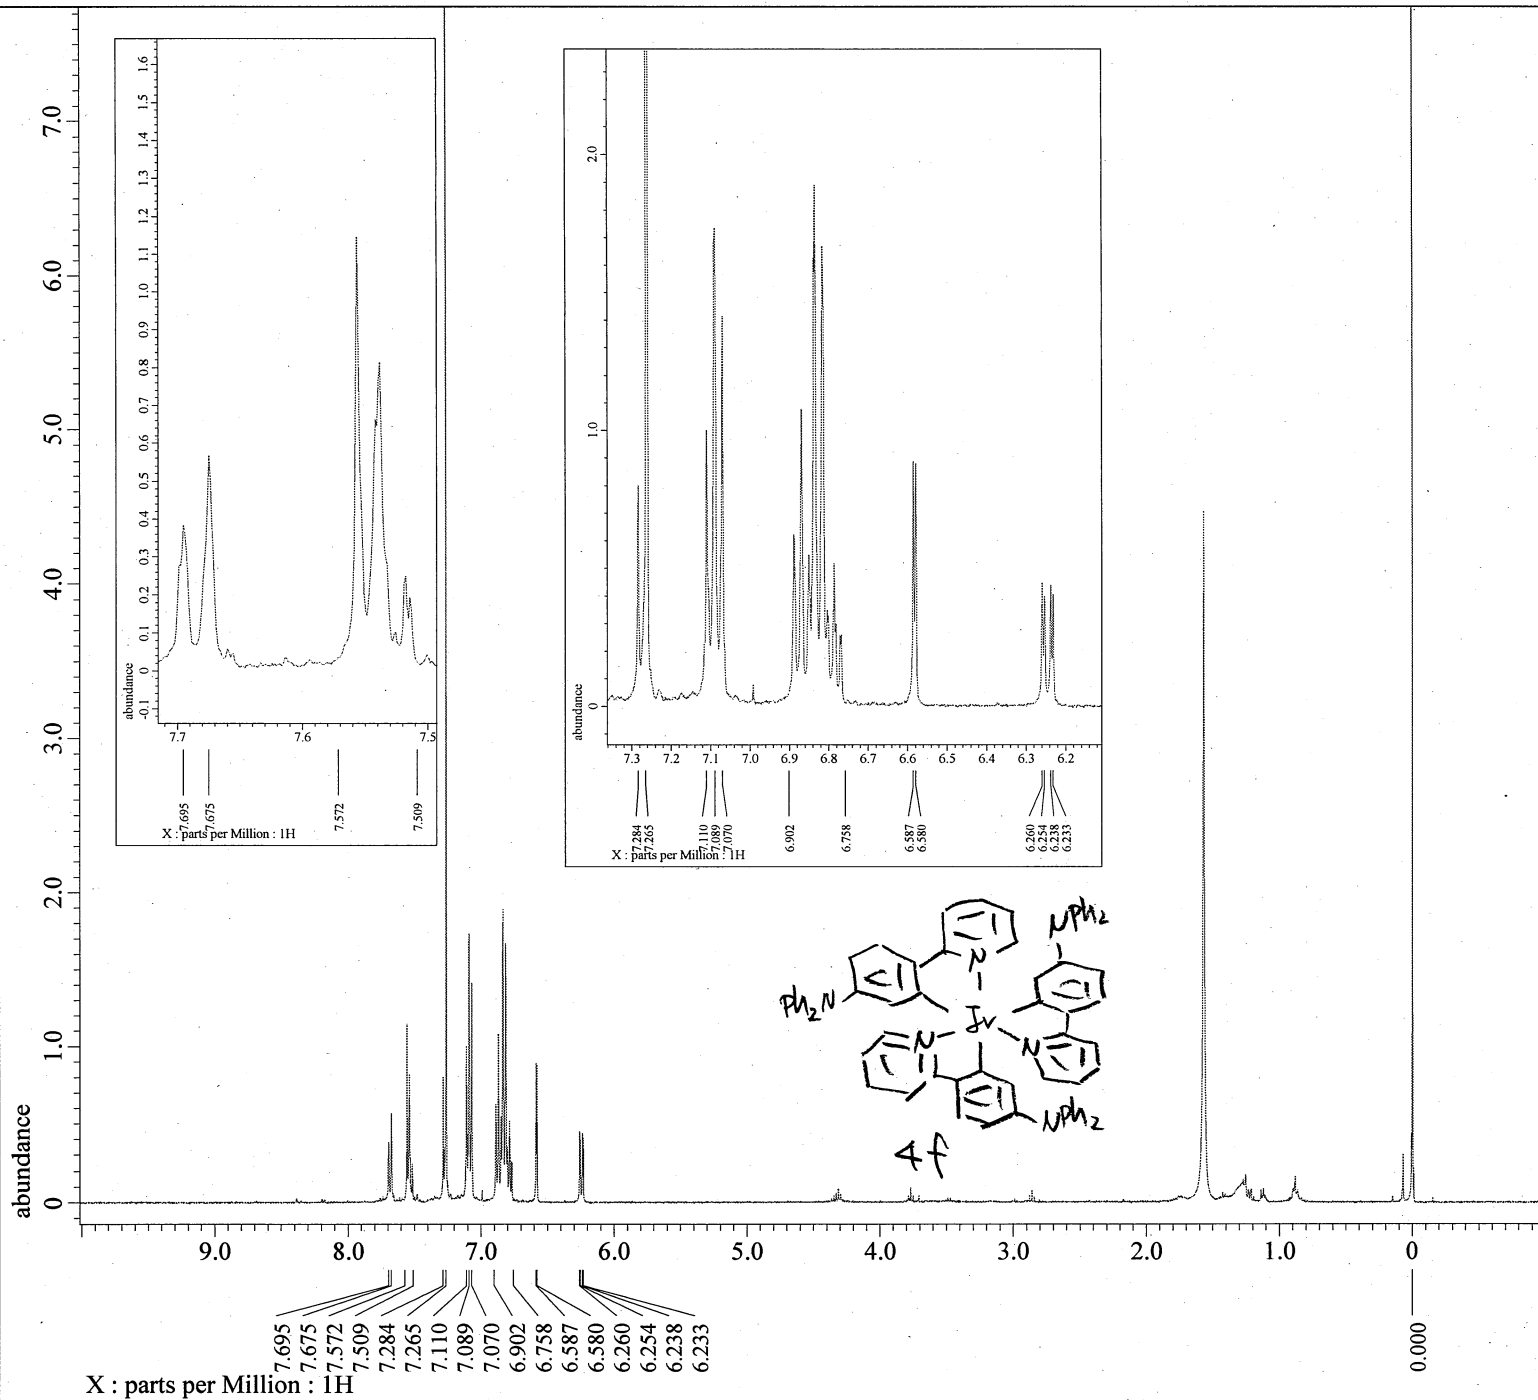

---- PROCESSING PARAMETERS ----  
 dc balance( 0, FALSE )  
 sexp( 0.2[Hz], 0.0[s] )  
 trapezoid3( 0[%], 80[%], 100[%] )  
 zerofill( 1, TRUE )  
 fft( 1, TRUE, TRUE )  
 machinephase  
 ppm

以下に由来: TBR389-redry-1.jdf

Filename = TBR389-redry-3.jdf  
 Author = element  
 Experiment = single\_pulse.ex2  
 Sample Id = #529608  
 Solvent = CHLOROFORM-D  
 Actual\_Start Time = 17-OCT-2022 21:22:06  
 Revision\_Time = 18-OCT-2022 16:50:19

Comment = single\_pulse  
 Data\_Format = 1D\_COMPLEX  
 Dim Size = 13107  
 X\_Domain = 1H  
 Dim\_Title = 1H  
 Dim\_Units = [ppm]  
 Dimensions = X  
 Site = ECS 400  
 Spectrometer = JNM-ECS400

Field Strength = 9.20197068[T] (390[MHz])  
 X\_Acq\_Duration = 2.228224[s]  
 X\_Domain = 1H  
 X\_Freq = 391.78655441[MHz]  
 X\_Offset = 5[ppm]  
 X\_Points = 16384  
 X\_Prescans = 1  
 X\_Resolution = 0.44878791[Hz]  
 X\_Sweep = 7.35294118[kHz]  
 Irr\_Domain = 1H  
 Irr\_Freq = 391.78655441[MHz]  
 Irr\_Offset = 5[ppm]  
 Tri\_Domain = 1H  
 Tri\_Freq = 391.78655441[MHz]  
 Tri\_Offset = 5[ppm]  
 Clipped = FALSE  
 Scans = 8  
 Total\_Scans = 8

Relaxation\_Delay = 5[s]  
 Recvr\_Gain = 56  
 Temp\_Get = 19.5[dc]  
 X\_90\_Width = 10.8[us]  
 X\_Acq\_Time = 2.228224[s]  
 X\_Angle = 45[deg]  
 X\_Atn = 1.9[dB]  
 X\_Pulse = 5.4[us]  
 Irr\_Mode = Off  
 Tri\_Mode = Off  
 Dante\_Presat = FALSE

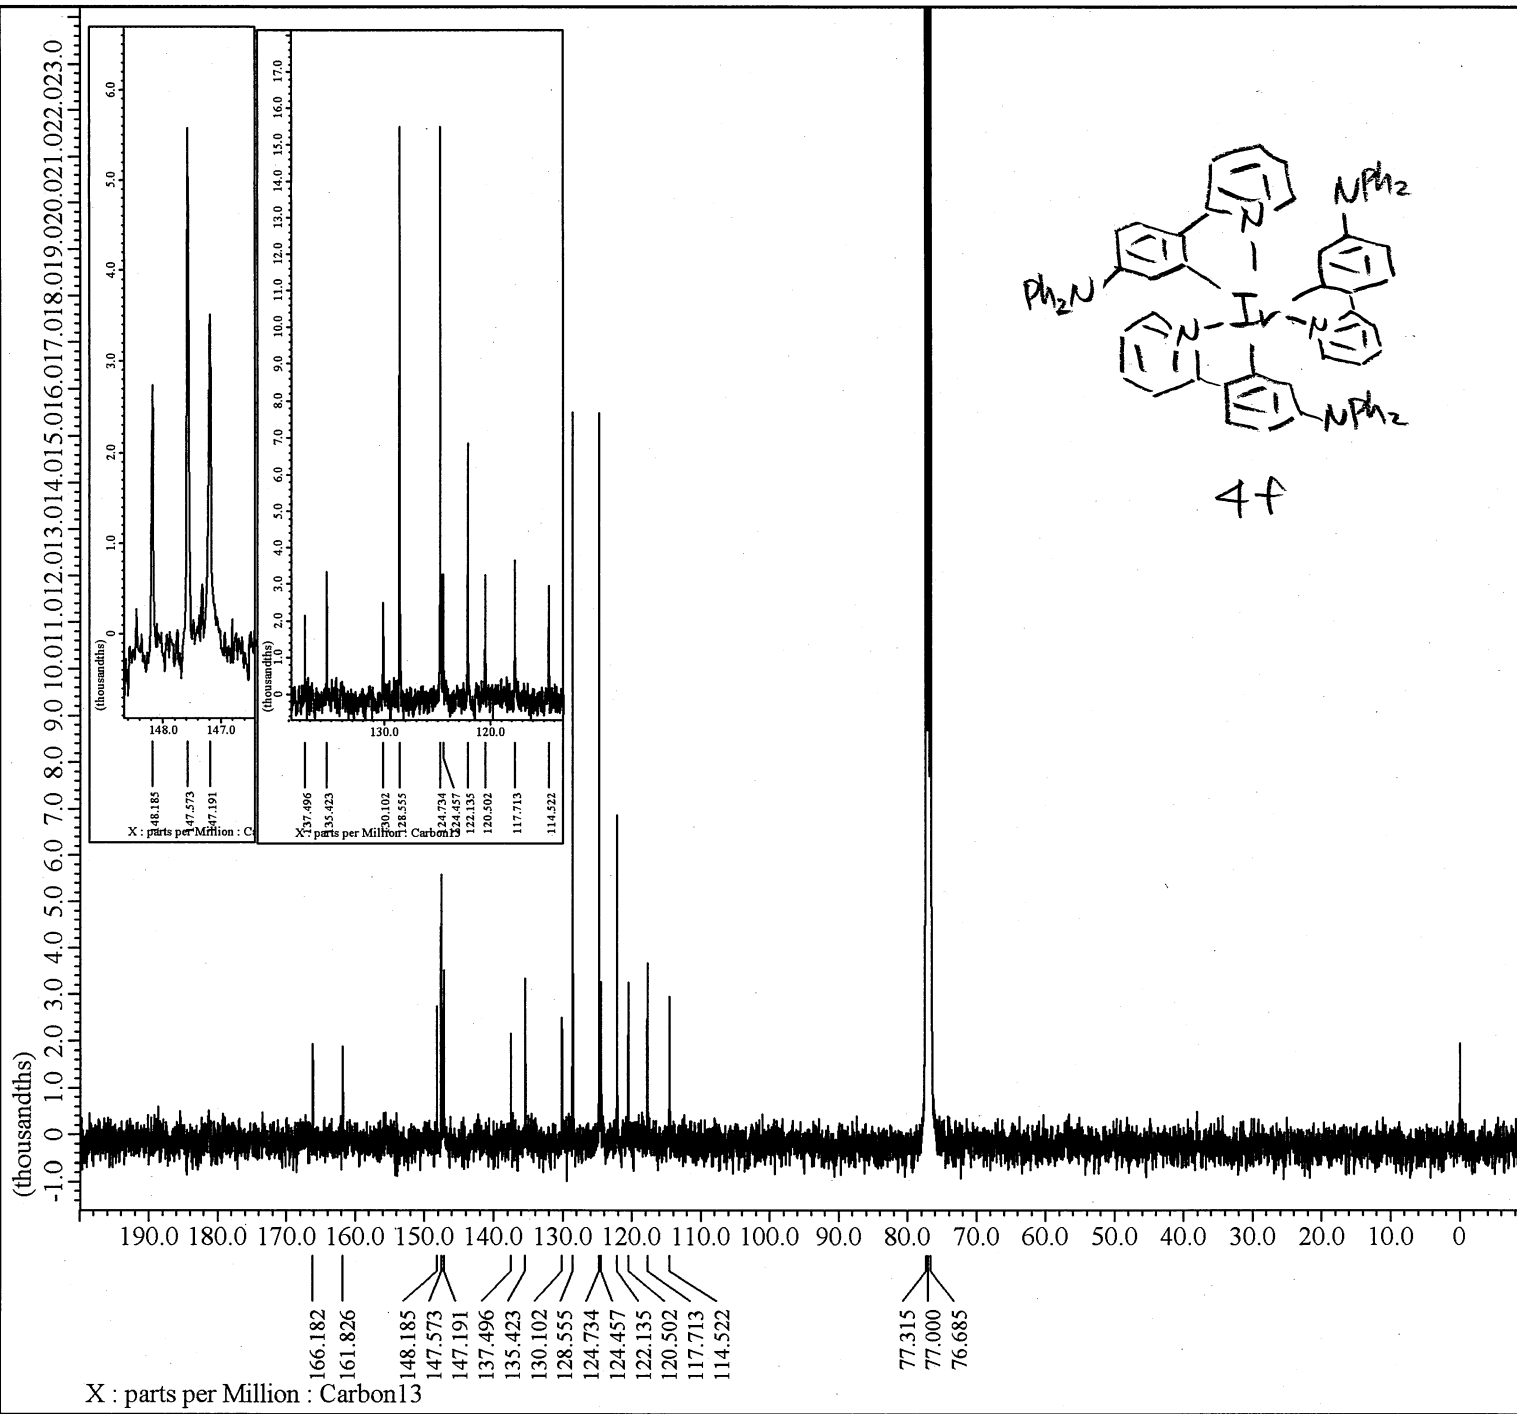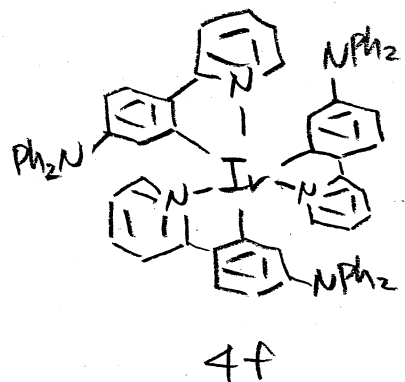

```

---- PROCESSING PARAMETERS ----
dc_balance( 0, FALSE )
sexp( 2.0[Hz], 0.0[s] )
trapezoid( 0[%], 0[%], 80[%], 100[%] )
zerofill( 1 )
fft( 1, TRUE, TRUE )
machinephase
ppm

Derived from: TBR389-C_Carbon-1-1.jdf

Filename      = TBR389-C_Carbon-1-2.jdf
Author       = element
Experiment   = carbon.jxp
Sample_Id    = TBR389-C
Solvent      = CHLOROFORM-D
Actual_Start_Time = 25-OCT-2022 22:35:00
Revision_Time  = 30-NOV-2022 11:33:44

Comment      = single pulse decoupled ga
Data_Format  = 1D COMPLEX
Dim_Size     = 26214
X_Domain     = Carbon
Dim_Title    = Carbon13
Dim_Units    = [ppm]
Dimensions   = X
Site         = JNM-ECS400
Spectrometer = DELTA2_NMR

Field_Strength = 9.37221[T] (400[MHz])
X_Acq_Duration = 1.04333312[s]
X_Domain       = 13C
X_Freq         = 100.33735165[MHz]
X_Offset      = 100.0[ppm]
X_Points      = 32768
X_Prescans    = 4
X_Resolution  = 0.95846665[Hz]
X_Sweep       = 31.40703518[kHz]
X_Sweep_Clippped = 25.12562814[kHz]
Irr_Domain    = Proton
Irr_Freq     = 399.03472754[MHz]
Irr_Offset   = 5.0[ppm]
Clipped      = FALSE
Scans        = 11264
Total_Scans   = 11264

Relaxation_Delay = 2[s]
Recvr_Gain       = 50
Temp_Get        = 18.1[dC]
X_90_Width     = 10.9[us]
X_Acq_Time     = 1.04333312[s]
X_Angle        = 30[deg]
X_Atn          = 5.4[dB]
X_Pulse        = 3.63333333[us]
Irr_Atn_Dec    = 25.823[dB]
Irr_Atn_Noe    = 25.823[dB]
Irr_Noise      = WALTZ
Irr_Pwidth     = 0.115[ms]
Decoupling     = TRUE
Initial_Wait   = 1[s]
Noe            = TRUE
Noe_Time       = 2[s]
Repetition_Time = 3.04333312[s]
  
```



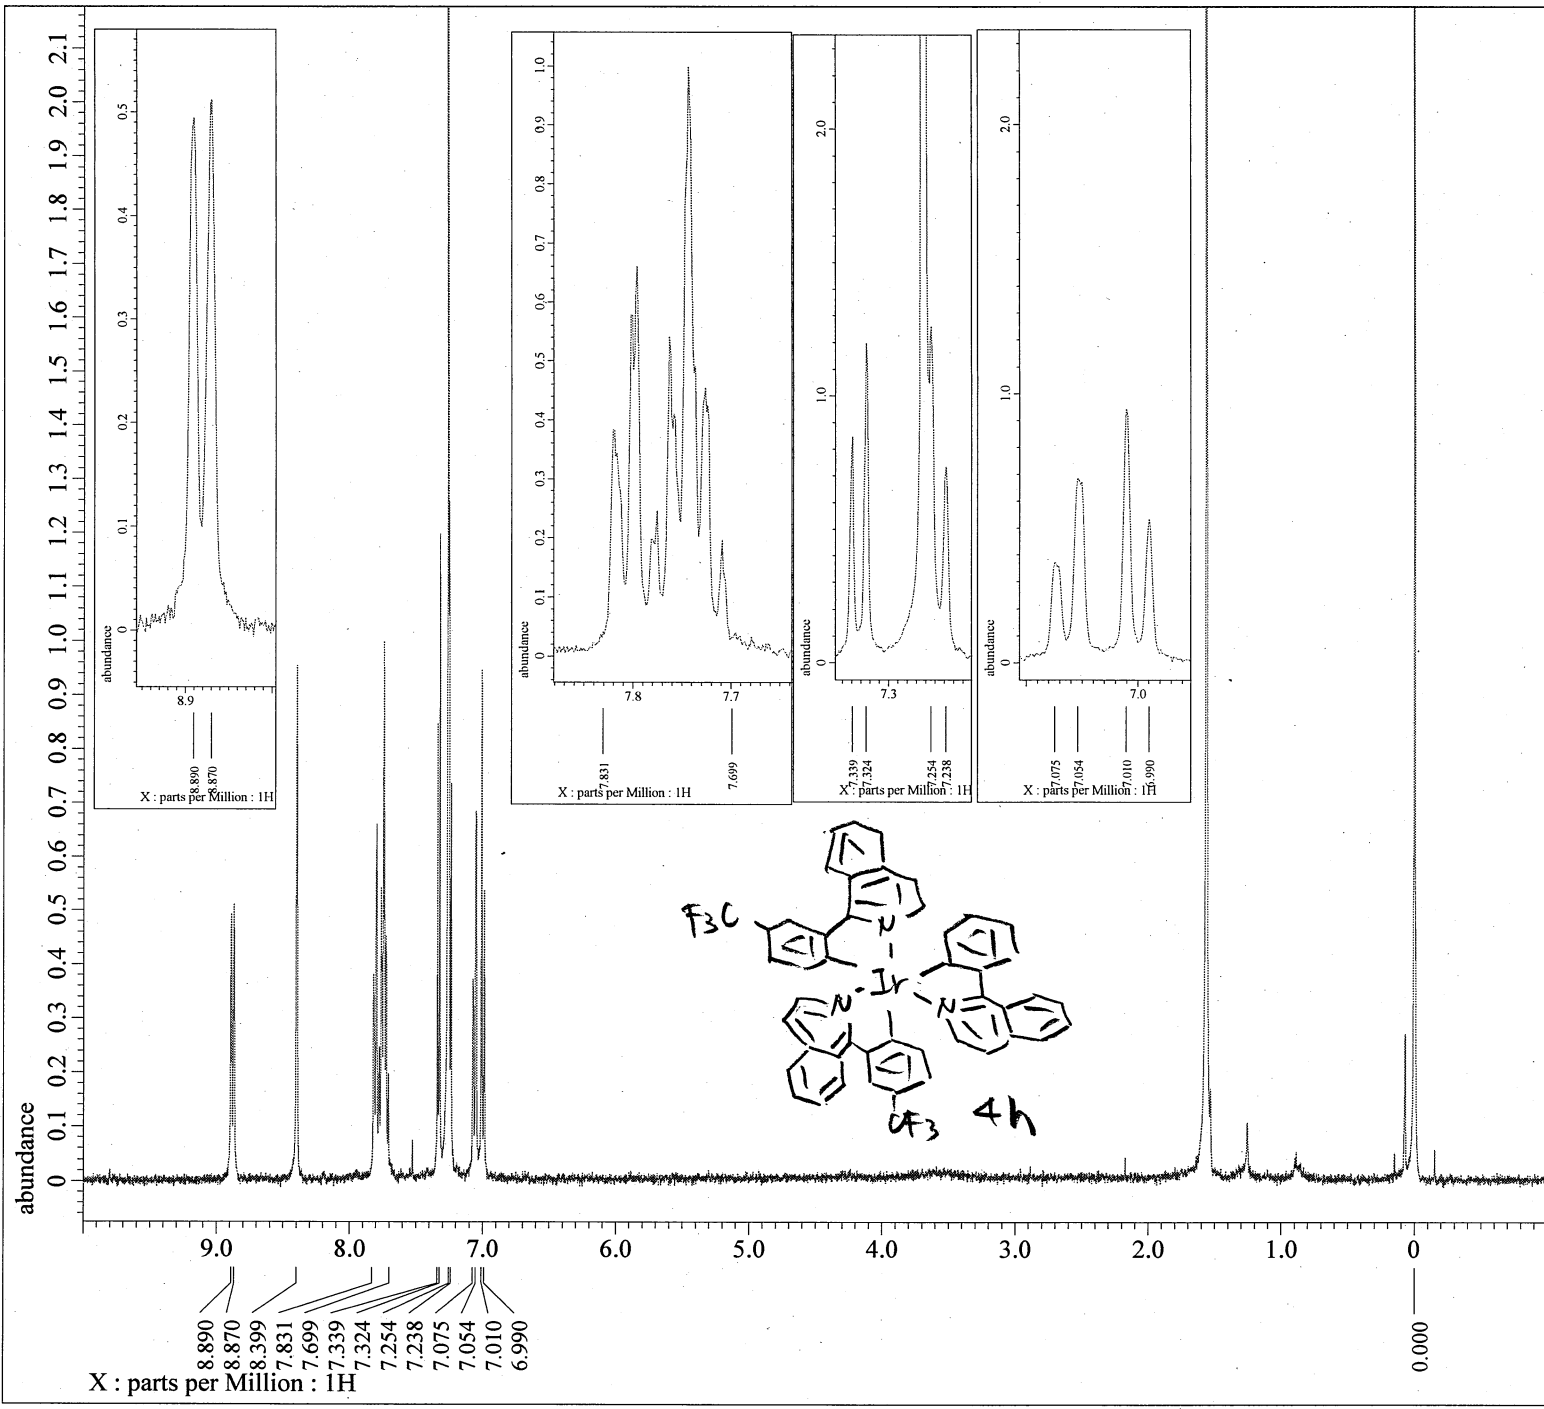

```

---- PROCESSING PARAMETERS ----
dc_balance( 0, FALSE )
sexp( 0.2[Hz], 0.0[s] )
trapezoid3( 0[%], 80[%], 100[%] )
zerofill( 1, TRUE )
fft( 1, TRUE, TRUE )
machinephase
ppm

以下に由来: TBR268-re-1.jdf

Filename           = TBR268-re-3.jdf
Author             = element
Experiment         = single_pulse.ex2
Sample Id          = S#692904
Solvent            = CHLOROFORM-D
Actual_Start Time  = 15-OCT-2022 01:54:37
Revision_Time      = 14-OCT-2022 21:39:50

Comment           = single_pulse
Data_Format       = 1D_COMPLEX
Dim_Size          = 13107
X_Domain          = 1H
Dim_Title         = 1H
Dim_Units         = [ppm]
Dimensions        = X
Site              = ECS 400
Spectrometer      = JNM-ECS400

Field_Strength    = 9.20197068[T] (390[MHz])
X_Acq_Duration    = 2.228224[s]
X_Domain          = 1H
X_Freq            = 391.78655441[MHz]
X_Offset          = 5[ppm]
X_Points          = 16384
X_Prescans        = 1
X_Resolution      = 0.44878791[Hz]
X_Sweep           = 7.35294118[kHz]
Irr_Domain        = 1H
Irr_Freq          = 391.78655441[MHz]
Irr_Offset        = 5[ppm]
Tri_Domain        = 1H
Tri_Freq          = 391.78655441[MHz]
Tri_Offset        = 5[ppm]
Clipped           = FALSE
Scans             = 8
Total_Scans       = 8

Relaxation_Delay  = 5[s]
Recvr_Gain        = 60
Temp_Get          = 20[dC]
X_90_Width        = 10.8[us]
X_Acq_Time        = 2.228224[s]
X_Angle           = 45[deg]
X_Atn             = 1.9[dB]
X_Pulse           = 5.4[us]
Irr_Mode          = Off
Tri_Mode          = Off
Dante_Presat      = FALSE
  
```



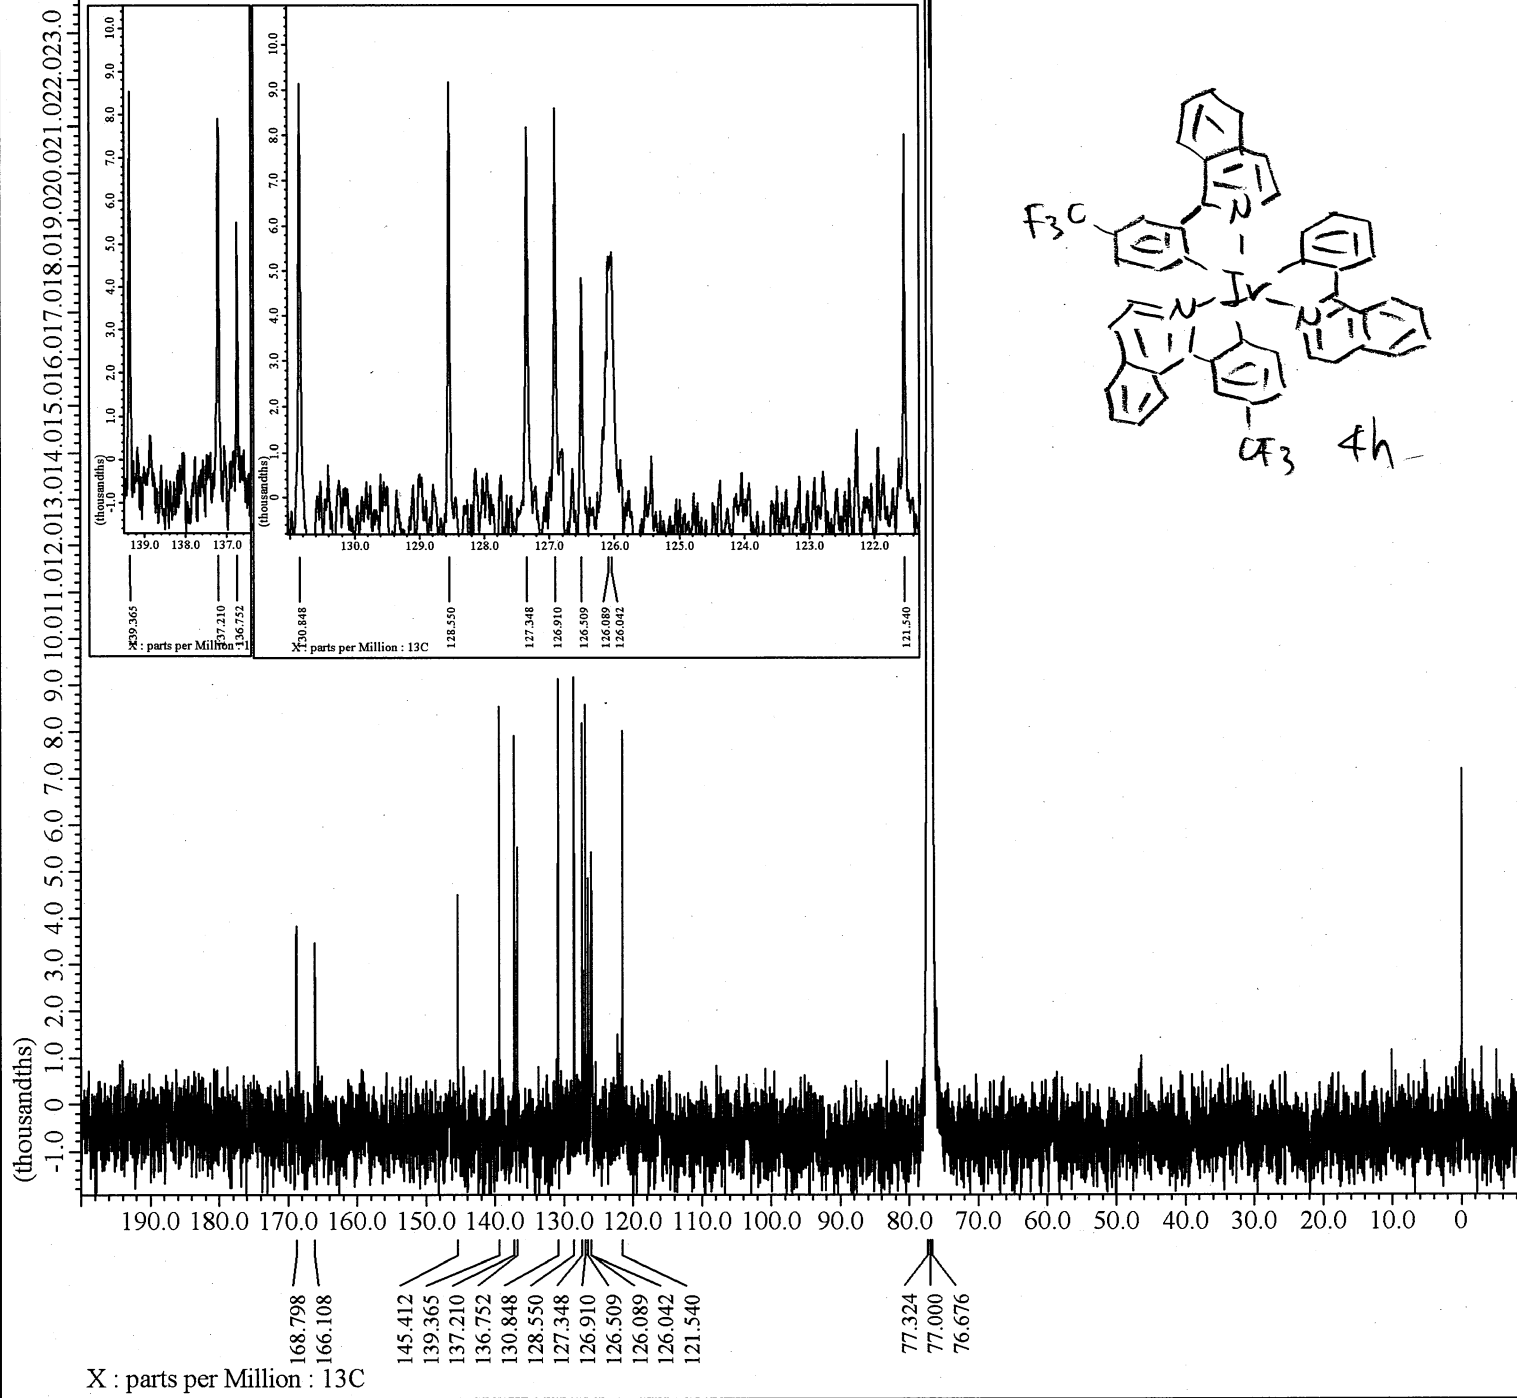

```

---- PROCESSING PARAMETERS ----
dc_balance( 0, FALSE )
sexp( 2.0[Hz], 0.0[s] )
trapezoid3( 0[%], 80[%], 100[%] )
zerofill( 1 )
fft( 1, TRUE, TRUE )
machinephase
ppm
Derived from: TBR268-C-1.jdf

```

```

Filename      = TBR268-C-2.jdf
Author       = element
Experiment    = single_pulse_dec
Sample_Id    = 1
Solvent      = CHLOROFORM-D
Actual_Start_Time = 25-OCT-2022 03:43:09
Revision_Time  = 30-NOV-2022 14:17:19

```

```

Comment      = single pulse decoupled ga
Data Format   = 1D COMPLEX
Dim Size     = 26214
X Domain     = 13C
Dim Title    = 13C
Dim Units    = [ppm]
Dimensions   = X
Site         = ECS 400
Spectrometer = JNM-ECS400

```

```

Field Strength = 9.20197068[T] (390[MHz])
X_Acq_Duration = 1.06430464[s]
X_Domain       = 13C
X_Freq         = 98.51479726[MHz]
X_Offset       = 100[ppm]
X_Points       = 32768
X_Prescans     = 4
X_Resolution   = 0.93958061[Hz]
X_Sweep        = 30.78817734[kHz]
Irr_Domain     = 1H
Irr_Freq       = 391.78655441[MHz]
Irr_Offset     = 5[ppm]
Clipped        = FALSE
Scans          = 11264
Total_Scans    = 11264

```

```

Relaxation_Delay = 2[s]
Recvr_Gain       = 58
Temp_Get         = 18.4[dC]
X_90_Width      = 8.7[us]
X_Acq_Time       = 1.06430464[s]
X_Angle         = 30[deg]
X_Atn           = 4.9[dB]
X_Pulse         = 2.9[us]
Irr_Atn_Dec     = 22.45[dB]
Irr_Atn_Noec   = 22.45[dB]
Irr_Noise       = WALTZ
Decoupling      = TRUE
Initial_Wait    = 1[s]
Noe              = TRUE
Noe_Time        = 2[s]
Repetition_Time = 3.06430464[s]

```

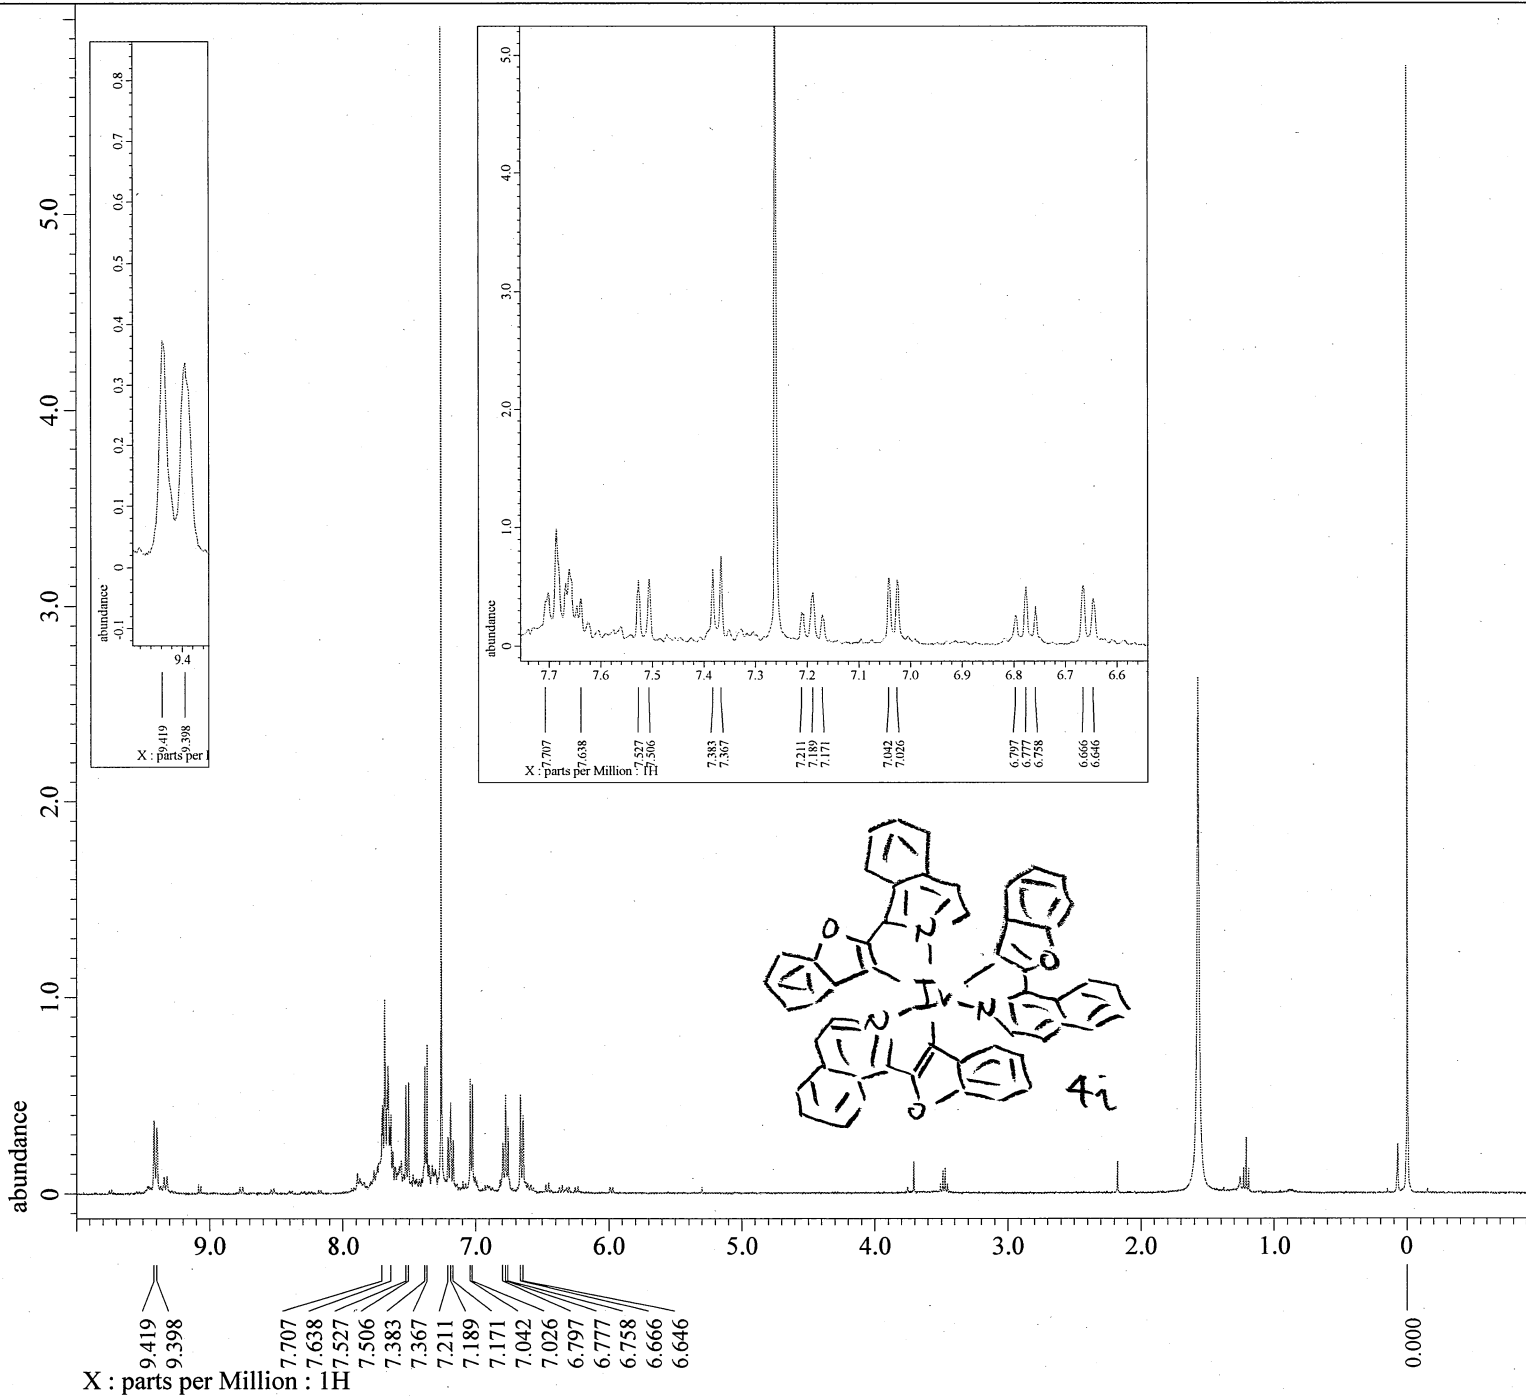

```

---- PROCESSING PARAMETERS ----
dc_balance( 0, FALSE )
sexp( 0.2[Hz], 0.0[s] )
trapezoid3( 0[%], 80[%], 100[%] )
zerofill( 1, TRUE )
fft( 1, TRUE, TRUE )
machinephase
ppm

以下に由来: TBR278-reredry-1.jdf

Filename      = TBR278-reredry-3.jdf
Author       = element
Experiment   = single_pulse.ex2
Sample Id    = S#603003
Solvent      = CHLOROFORM-D
Actual_Start_Time = 19-OCT-2022 23:24:07
Revision_Time   = 27-OCT-2022 10:32:08

Comment      = single_pulse
Data Format   = 1D_COMPLEX
Dim Size     = 13107
X_Domain     = 1H
Dim Title    = 1H
Dim Units    = [ppm]
Dimensions   = X
Site         = ECS 400
Spectrometer = JNM-ECS400

Field Strength = 9.20197068[T] (390[MHz])
X_Acq_Duration = 2.228224[s]
X_Domain       = 1H
X_Freq        = 391.78655441[MHz]
X_Offset      = 5[ppm]
X_Points      = 16384
X_Prescans    = 1
X_Resolution  = 0.44878791[Hz]
X_Sweep       = 7.35294118[kHz]
Irr_Domain    = 1H
Irr_Freq      = 391.78655441[MHz]
Irr_Offset    = 5[ppm]
Tri_Domain    = 1H
Tri_Freq      = 391.78655441[MHz]
Tri_Offset    = 5[ppm]
Clipped       = FALSE
Scans         = 8
Total_Scans   = 8

Relaxation_Delay = 5[s]
Recvr Gain       = 54
Temp_Get        = 19.4[dC]
X_90_Width      = 10.8[us]
X_Acq_Time      = 2.228224[s]
X_Angle         = 45[deg]
X_Atn           = 1.9[dB]
X_Pulse        = 5.4[us]
Irr_Mode        = Off
Tri_Mode        = Off
Dante_Presat    = FALSE
  
```

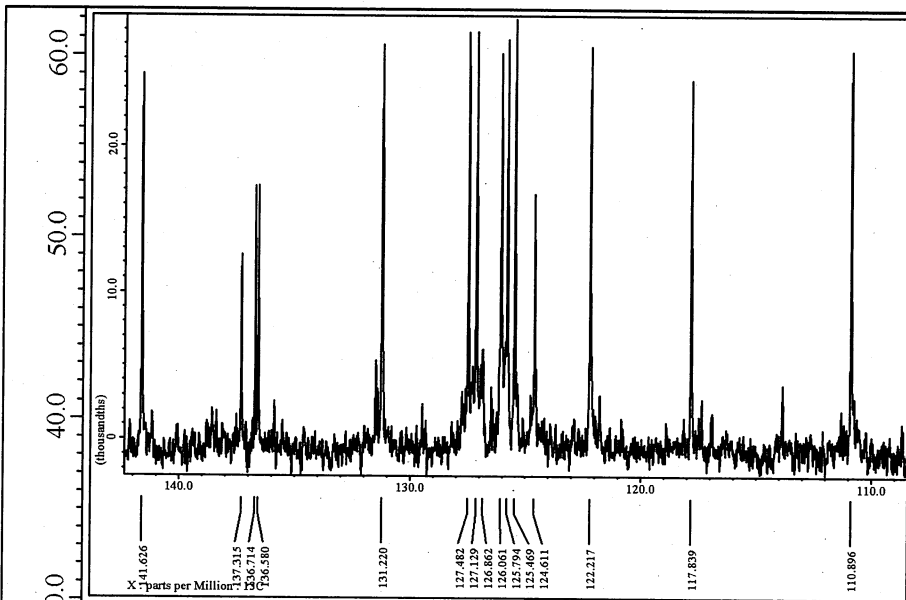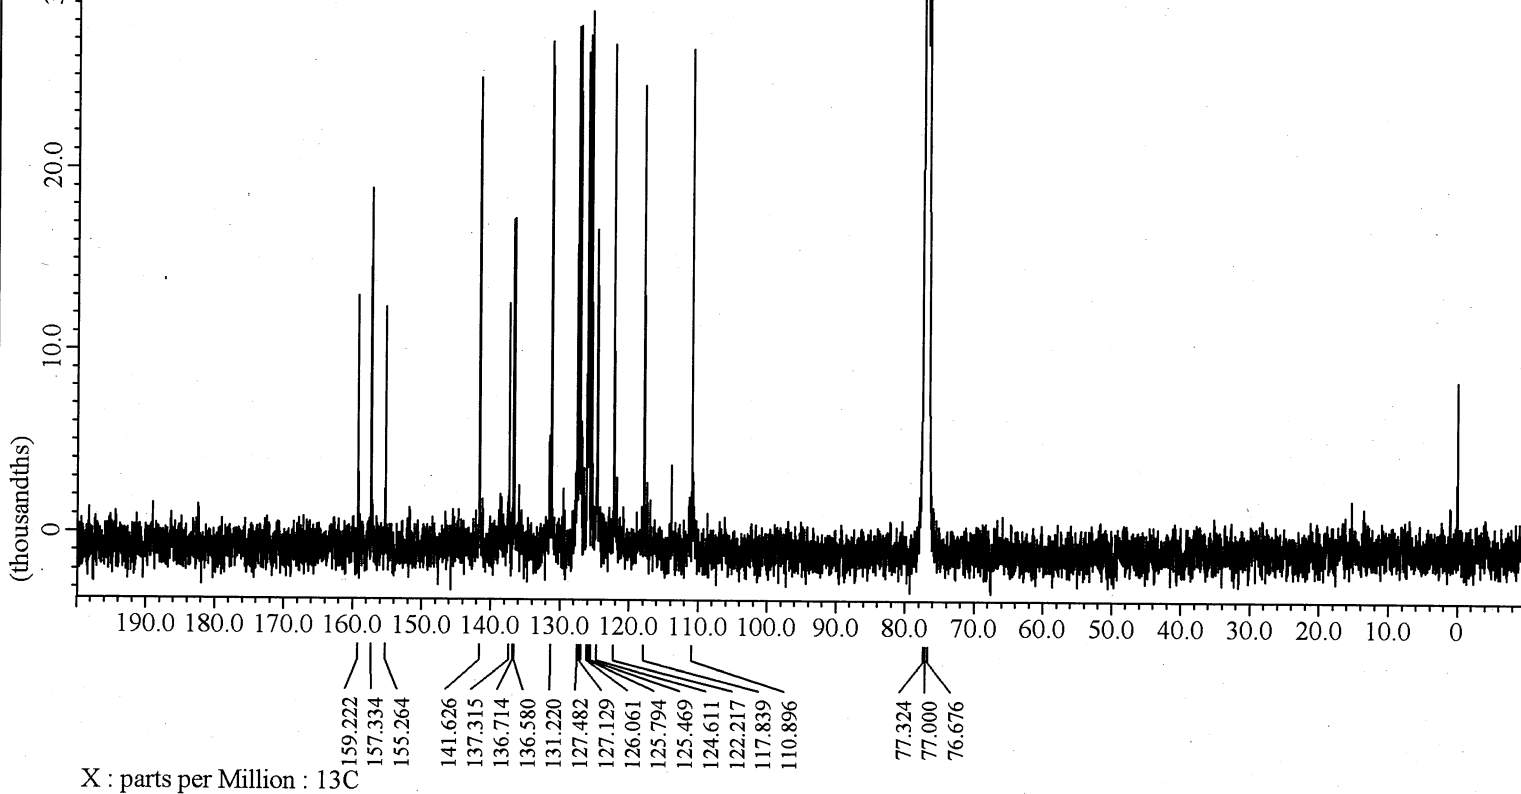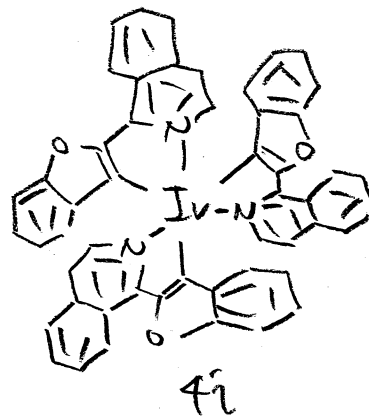

```

---- PROCESSING PARAMETERS ----
dc_balance( 0, FALSE )
sexp( 2.0[Hz], 0.0[s] )
trapezoid3( 0[%], 80[%], 100[%] )
zerofill( 1 )
fft( 1, TRUE, TRUE )
machinephase
ppm

```

Derived from: TBR278-C-1.jdf

```

Filename      = TBR278-C-2.jdf
Author       = element
Experiment    = single_pulse_dec
Sample_Id    = 1
Solvent      = CHLOROFORM-D
Actual_Start_Time = 29-OCT-2022 03:44:40
Revision_Time = 30-NOV-2022 14:19:15

```

```

Comment      = single pulse decoupled ga
Data_Format  = 1D COMPLEX
Dim_Size     = 26214
X_Domain     = 13C
Dim_Title    = 13C
Dim_Units    = [ppm]
Dimensions   = X
Site         = ECS 400
Spectrometer = JNM-ECS400

```

```

Field_Strength = 9.20197068[T] (390[MHz])
X_Acq_Duration = 1.06430464[s]
X_Domain       = 13C
X_Freq         = 98.51479726[MHz]
X_Offset       = 100[ppm]
X_Points      = 32768
X_Prescans    = 4
X_Resolution  = 0.93958061[Hz]
X_Sweep       = 30.78817734[kHz]
Irr_Domain     = 1H
Irr_Freq      = 391.78655441[MHz]
Irr_Offset     = 5[ppm]
Clipped       = FALSE
Scans         = 11264
Total_Scans   = 11264

```

```

Relaxation_Delay = 2[s]
Recvr_Gain       = 60
Temp_Get        = 17.9[dC]
X_90_Width      = 8.7[us]
X_Acq_Time      = 1.06430464[s]
X_Angle         = 30[deg]
X_Atn           = 4.9[dB]
X_Pulse         = 2.9[us]
Irr_Atn_Dec     = 22.45[dB]
Irr_Atn_No     = 22.45[dB]
Irr_Noise       = WALTZ
Decoupling      = TRUE
Initial_Wait    = 1[s]
Noe             = TRUE
Noe_Time        = 2[s]
Repetition_Time = 3.06430464[s]

```

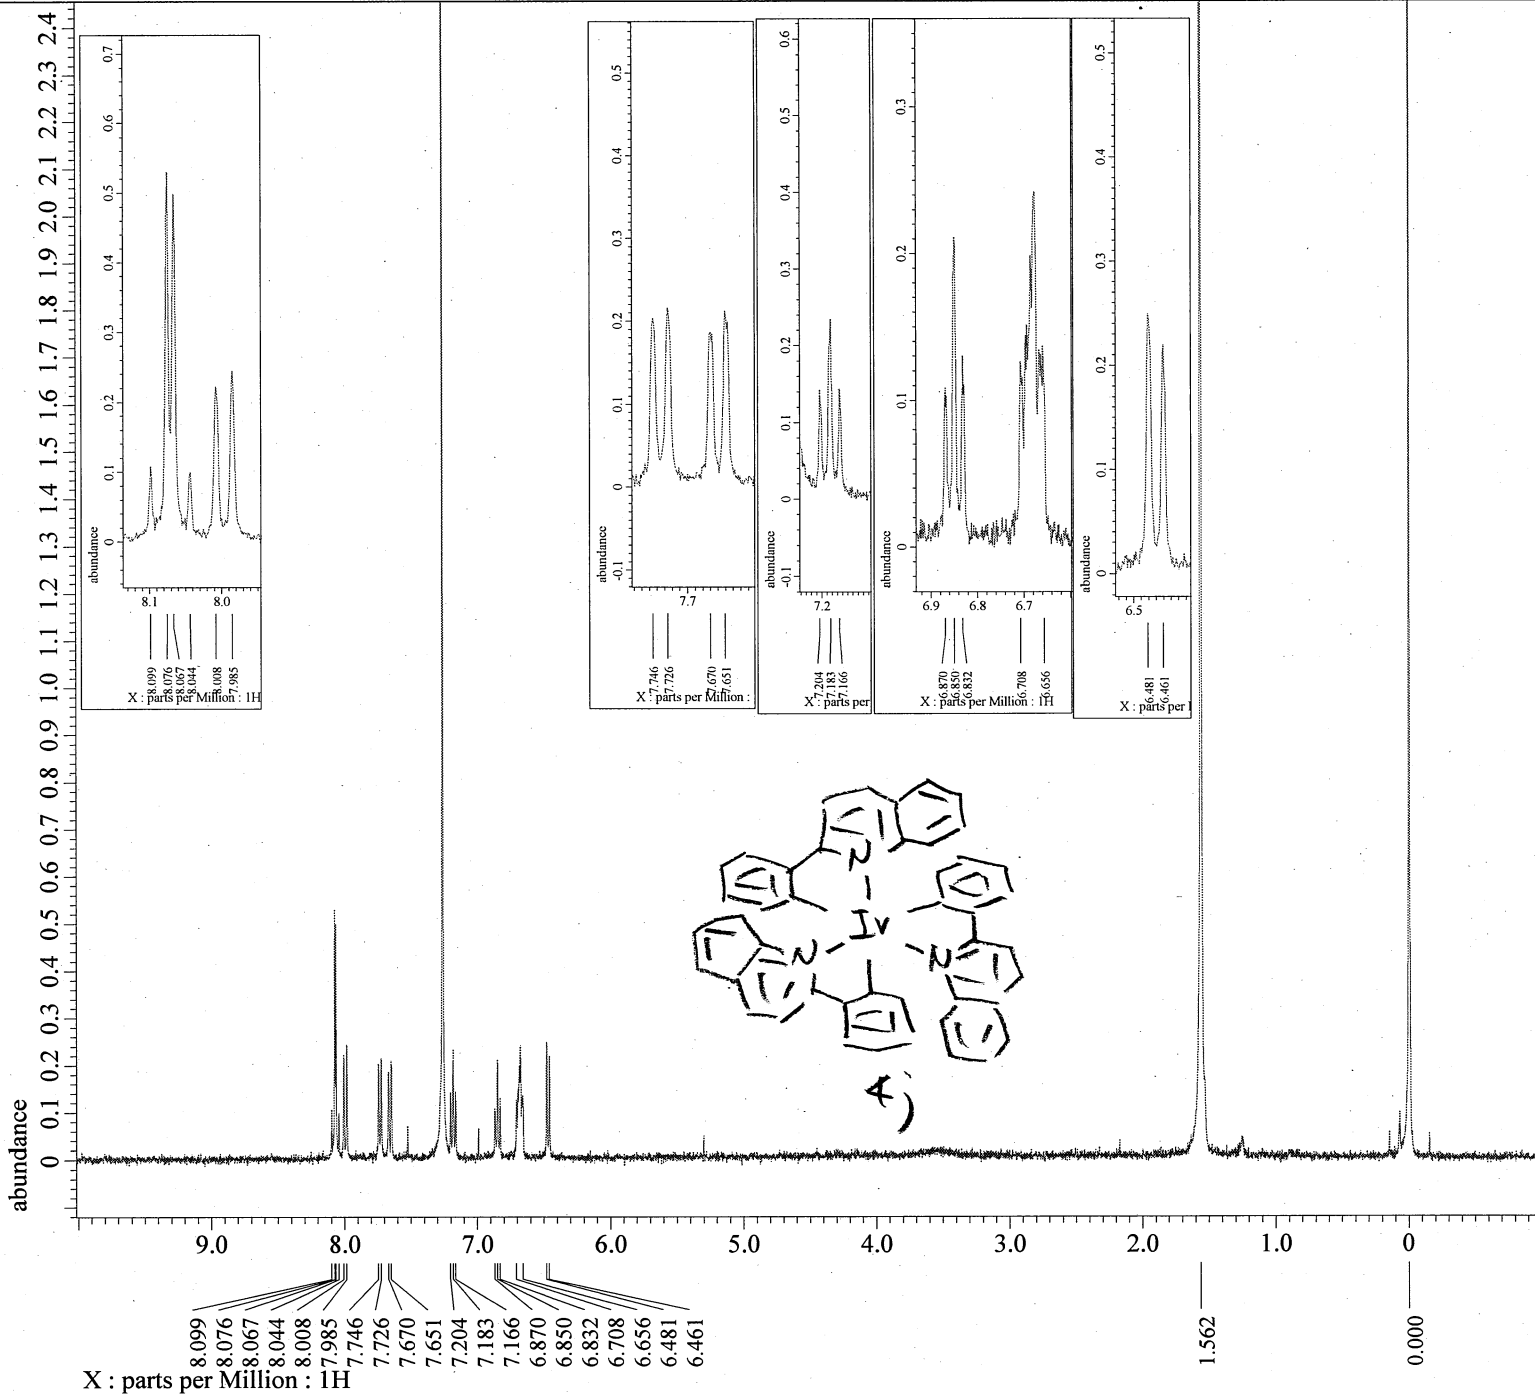

```

---- PROCESSING PARAMETERS ----
dc_balance( 0, FALSE )
sexp( 0.2[Hz], 0.0[s] )
trapezoid3( 0[%], 80[%], 100[%] )
zerofill( 1, TRUE )
fft( 1, TRUE, TRUE )
machinephase
ppm

以下に由来: TBR239-re-1.jdf

Filename           = TBR239-re-6.jdf
Author            = element
Experiment        = single_pulse.ex2
Sample Id         = S#688368
Solvent           = CHLOROFORM-D
Actual_Start Time = 15-OCT-2022 01:47:18
Revision Time     = 14-OCT-2022 21:21:13

Comment           = single_pulse
Data_Format       = 1D_COMPLEX
Dim Size          = 13107
X_Domain          = 1H
Dim Title         = 1H
Dim Units         = [ppm]
Dimensions        = X
Site              = ECS 400
Spectrometer      = JNM-ECS400

Field Strength    = 9.20197068[T] (390[MHz])
X_Acq_Duration   = 2.228224[s]
X_Domain         = 1H
X_Freq           = 391.78655441[MHz]
X_Offset         = 5[ppm]
X_Points         = 16384
X_Prescans       = 1
X_Resolution     = 0.44878791[Hz]
X_Sweep          = 7.35294118[kHz]
Irr_Domain       = 1H
Irr_Freq         = 391.78655441[MHz]
Irr_Offset       = 5[ppm]
Tri_Domain       = 1H
Tri_Freq         = 391.78655441[MHz]
Tri_Offset       = 5[ppm]
Clipped          = FALSE
Scans            = 8
Total_Scans      = 8

Relaxation_Delay = 5[s]
Recvr_Gain       = 60
Temp_Get         = 20.1[dc]
X_90_Width       = 10.8[us]
X_Acq_Time       = 2.228224[s]
X_Angle          = 45[deg]
X_Atn            = 1.9[db]
X_Pulse          = 5.4[us]
Irr_Mode         = Off
Tri_Mode         = Off
Dante_Presat     = FALSE
  
```

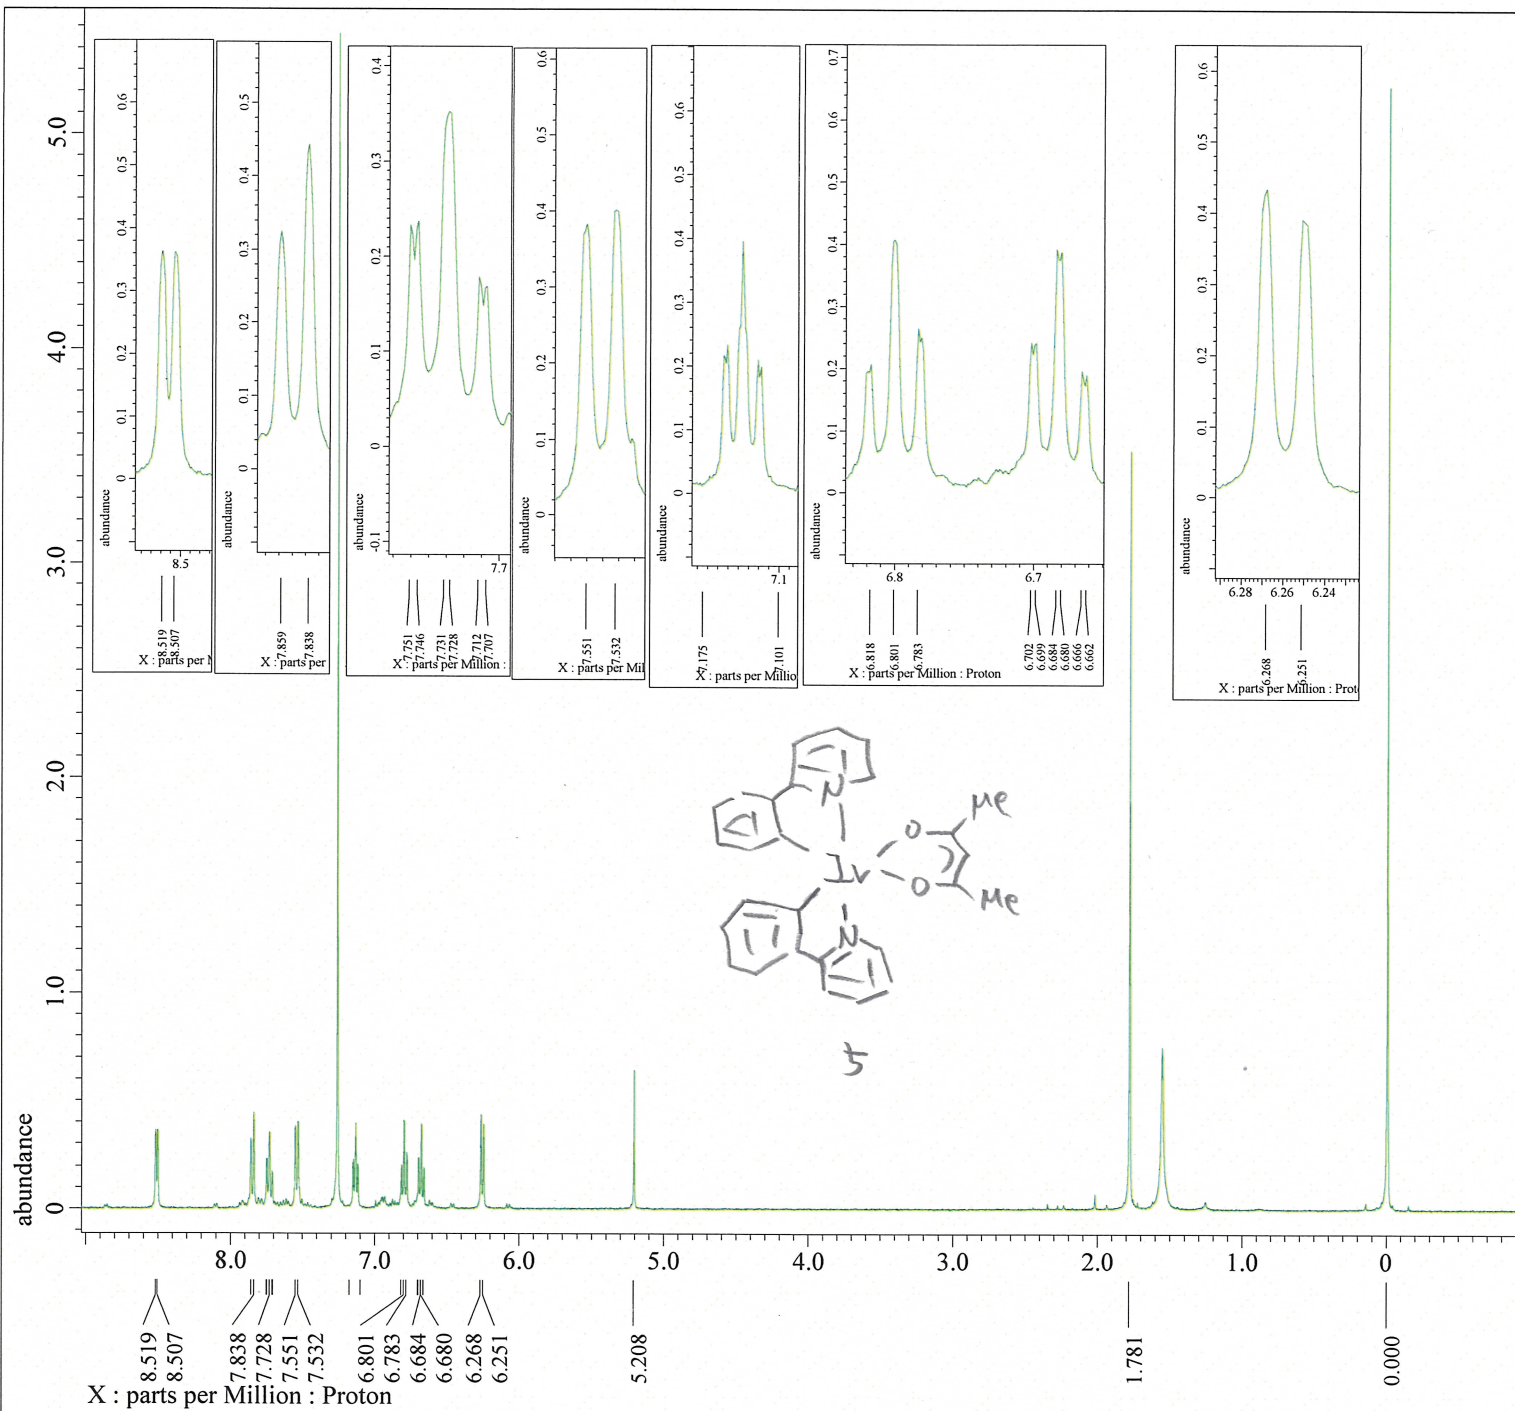

```

---- PROCESSING PARAMETERS ----
dc_balance( 0, FALSE )
sexp( 0.2[Hz], 0.0[s] )
trapezoid( 0[%], 0[%], 80[%], 100[%] )
zeroFill( 1 )
fft( 1, TRUE, TRUE )
machinephase
ppm

Derived from: TBR727-paper_Proton-1-1.jdf

```

```

Filename      = TBR727-paper_Proton-1-9.j
Author       = element
Experiment   = proton.jxp
Sample_Id    = TBR727-paper
Solvent      = CHLOROFORM-D
Actual_Start_Time = 14-MAR-2023 14:40:51
Revision_Time   = 14-MAR-2023 13:59:56

Comment      = single_pulse
Data_Format  = 1D COMPLEX
Dim_Size     = 13107
X_Domain     = Proton
Dim_Title    = Proton
Dim_Units    = [ppm]
Dimensions   = X
Site         = JNM-ECS400
Spectrometer = DELTA2_NMR

```

```

Field_Strength = 9.37221 [T] (400[MHz])
X_Acq_Duration = 2.1889024 [s]
X_Domain       = 1H
X_Freq         = 399.03472754 [MHz]
X_Offset       = 5.0 [ppm]
X_Points       = 16384
X_Prescans     = 1
X_Resolution   = 0.45684997 [Hz]
X_Sweep        = 7.48502994 [kHz]
X_Sweep_Clippped = 5.98802395 [kHz]
Irr_Domain     = Proton
Irr_Freq       = 399.03472754 [MHz]
Irr_Offset     = 5.0 [ppm]
Tri_Domain     = Proton
Tri_Freq       = 399.03472754 [MHz]
Tri_Offset     = 5.0 [ppm]
Clipped        = FALSE
Scans          = 8
Total_Scans    = 8

Relaxation_Delay = 5 [s]
Recvr_Gain       = 50
Temp_Get         = 19.5 [dC]
X_90_Width      = 6.6 [us]
X_Acq_Time      = 2.1889024 [s]
X_Angle         = 45 [deg]
X_Atn           = 1 [dB]
X_Pulse         = 3.3 [us]
Irr_Mode        = Off
Tri_Mode        = Off
Dante_Presat    = FALSE
Initial_Wait    = 1 [s]
Repetition_Time = 7.1889024 [s]

```

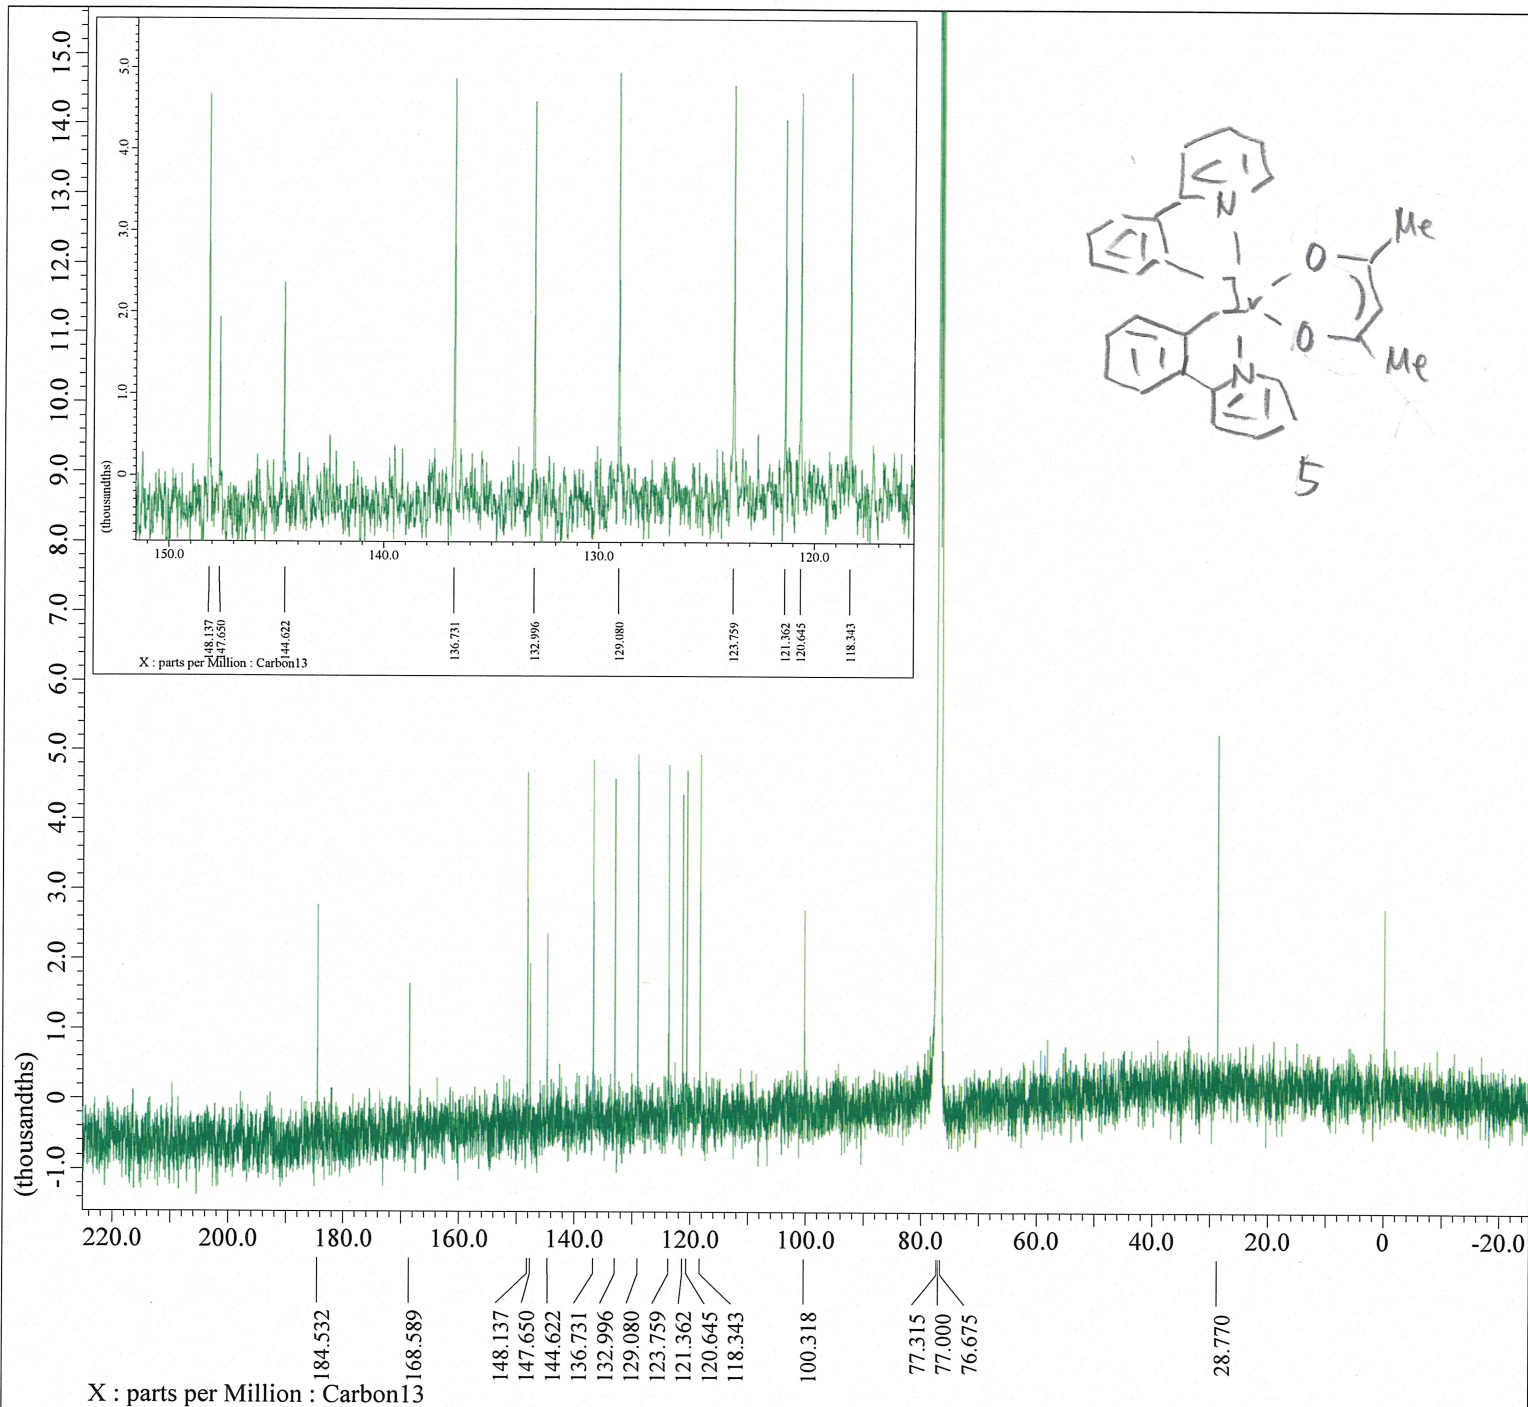

```

---- PROCESSING PARAMETERS ----
dc_balance( 0, FALSE )
sexp( 2.0[Hz], 0.0[s] )
trapezoid( 0[%], 0[%], 80[%], 100[%] )
zerofill( 1 )
fft( 1, TRUE, TRUE )
machinephase
ppm
Derived from: TBR727_Carbon-1-1.jdf

```

```

Filename      = TBR727_Carbon-1-2.jdf
Author       = element
Experiment   = carbon.jxp
Sample Id    = TBR727
Solvent      = CHLOROFORM-D
Actual Start Time = 9-MAR-2023 22:16:20
Revision Time = 14-MAR-2023 16:17:53

```

```

Comment      = single pulse decoupled ga
Data Format   = 1D COMPLEX
Dim Size     = 26214
X_Domain     = Carbon
Dim Title    = Carbon13
Dim Units    = [ppm]
Dimensions   = X
Site         = JNM-ECS400
Spectrometer = DELTA2_NMR

```

```

Field Strength = 9.37221[T] (400[MHz])
X_Acq Duration = 1.04333312[s]
X_Domain       = 13C
X_Freq         = 100.33735165[MHz]
X_Offset       = 100.0[ppm]
X_Points       = 32768
X_Prescans     = 4
X_Resolution   = 0.95846665[Hz]
X_Sweep        = 31.40703518[kHz]
X_Sweep_Clip   = 25.12562814[kHz]
Irr_Domain     = Proton
Irr_Freq       = 399.03472754[MHz]
Irr_Offset     = 5.0[ppm]
Clipped        = FALSE
Scans          = 10254
Total_Scans    = 10254

```

```

Relaxation_Delay = 2[s]
Recvr_Gain       = 50
Temp_Get         = 19.4[dC]
X_90_Width       = 10.9[us]
X_Acq_Time       = 1.04333312[s]
X_Angle          = 30[deg]
X_Atn            = 5.4[dB]
X_Pulse          = 3.63333333[us]
Irr_Atn_Dec     = 25.823[dB]
Irr_Atn_No     = 25.823[dB]
Irr_Noise       = WALTZ
Irr_Pwidth      = 0.115[ms]
Decoupling       = TRUE
Initial_Wait     = 1[s]
Noe              = TRUE
Noe_Time        = 2[s]
Repetition_Time = 3.04333312[s]

```

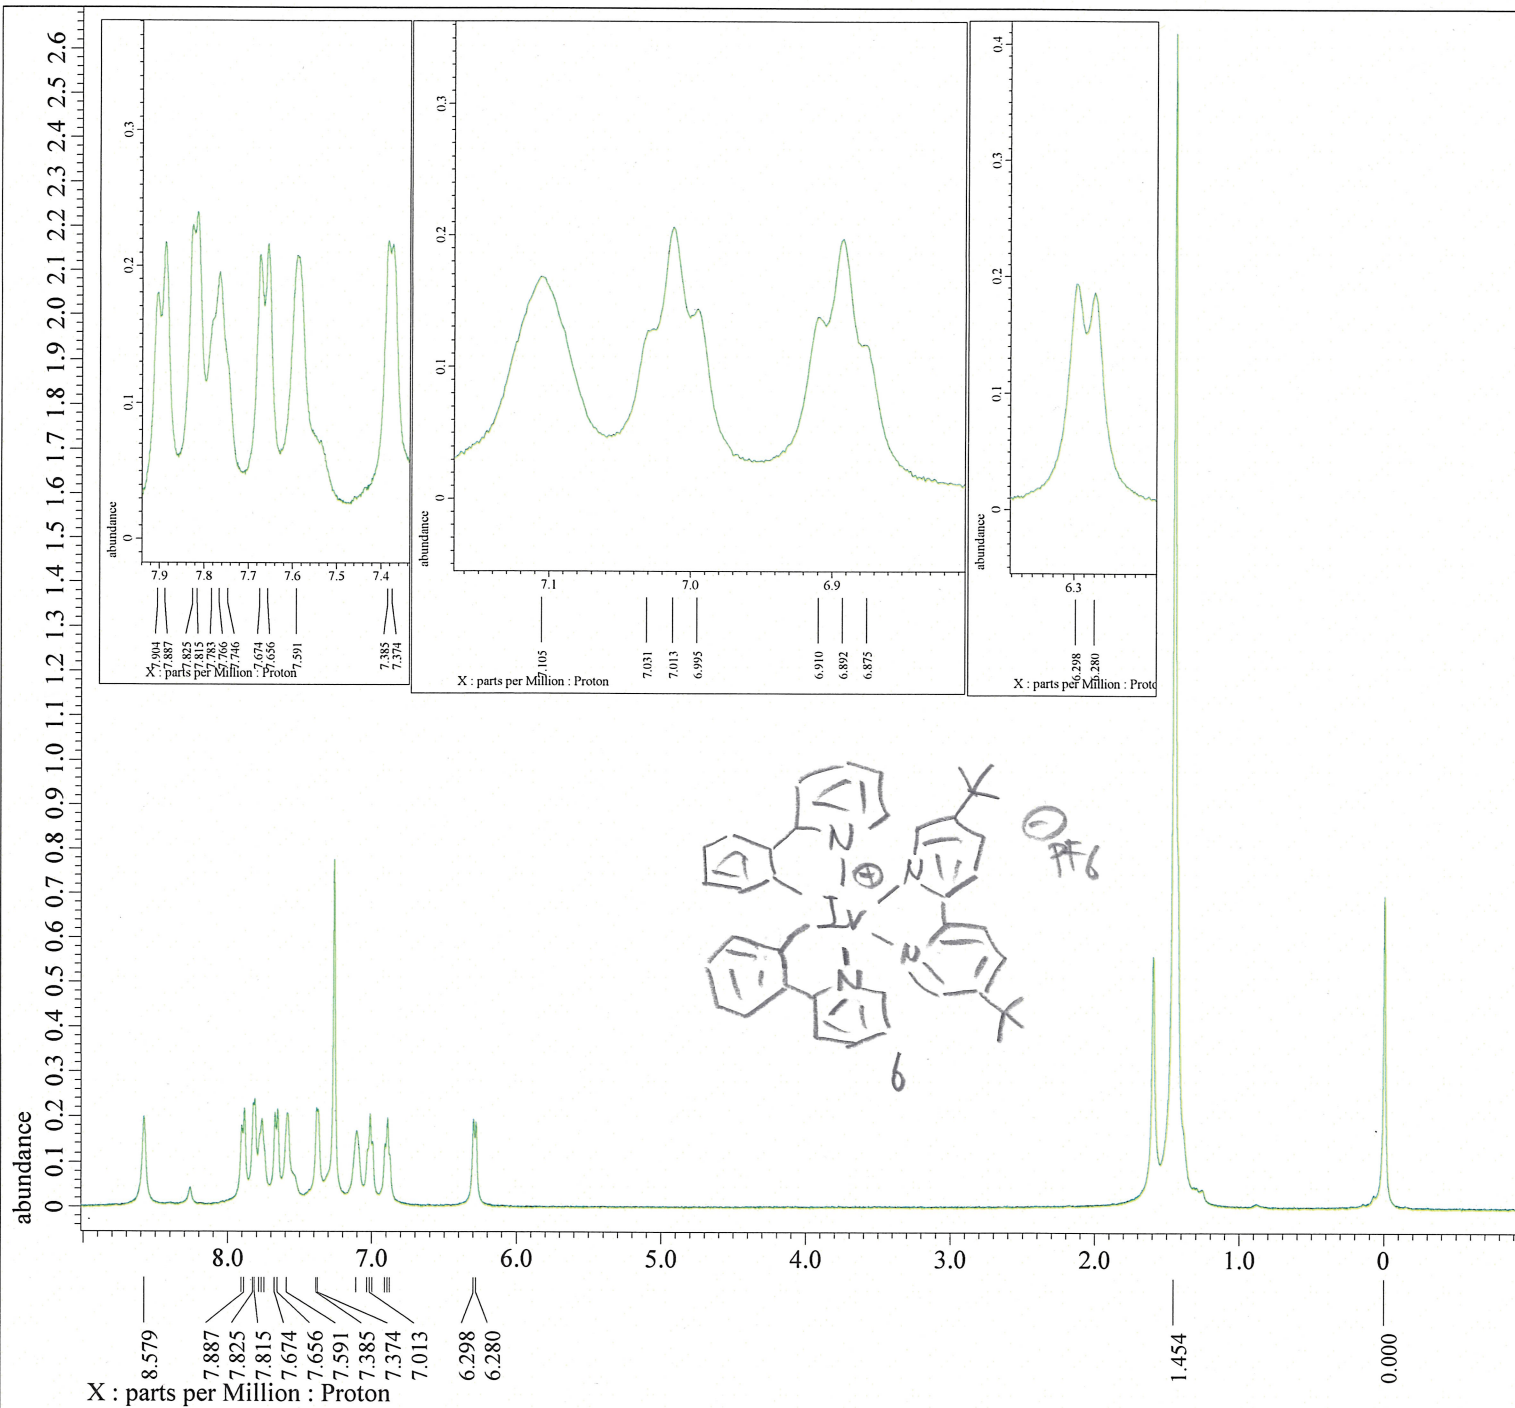

```

---- PROCESSING PARAMETERS ----
dc_balance( 0, FALSE )
sexp( 0.2[Hz], 0.0[s] )
trapezoid( 0[%], 0[%], 80[%], 100[%] )
zerofill( 1 )
fft( 1, TRUE, TRUE )
machinephase
ppm

Derived from: TBR724-paper-re_Proton-1-1.jdf

Filename      = TBR724-paper-re_Proton-1-
Author       = element
Experiment   = proton.jxp
Sample Id    = TBR724-paper-re
Solvent      = CHLOROFORM-D
Actual_Start_Time = 16-MAR-2023 10:02:34
Revision_Time   = 16-MAR-2023 10:18:27

Comment      = single_pulse
Data Format   = 1D_COMPLEX
Dim Size     = 13107
X Domain     = Proton
Dim Title    = Proton
Dim Units    = [ppm]
Dimensions   = X
Spectrometer = DELTA2_NMR

Field_Strength = 9.4073814[T] (400[MHz])
X_Acq_Duration = 2.18103808[s]
X_Domain       = 1H
X_Freq        = 400.53219825[MHz]
X_Offset      = 5[ppm]
X_Points      = 16384
X_Prescans    = 1
X_Resolution  = 0.45849727[Hz]
X_Sweep       = 7.51201923[kHz]
X_Sweep_Clippped = 6.00961538[kHz]
Irr_Domain    = Proton
Irr_Freq      = 400.53219825[MHz]
Irr_Offset    = 5[ppm]
Tri_Domain    = Proton
Tri_Freq      = 400.53219825[MHz]
Tri_Offset    = 5[ppm]
Clipped       = FALSE
Scans         = 8
Total_Scans   = 8

Relaxation_Delay = 5[s]
Recvr_Gain       = 46
Temp_Get         = 18.9[dC]
X_90_Width      = 6.7[us]
X_Acq_Time       = 2.18103808[s]
X_Angle         = 45[deg]
X_Atn           = 0.8[dB]
X_Pulse         = 3.35[us]
Irr_Mode        = Off
Tri_Mode        = Off
Dante_Presat    = FALSE
Initial_Wait    = 1[s]
Repetition_Time = 7.18103808[s]

```

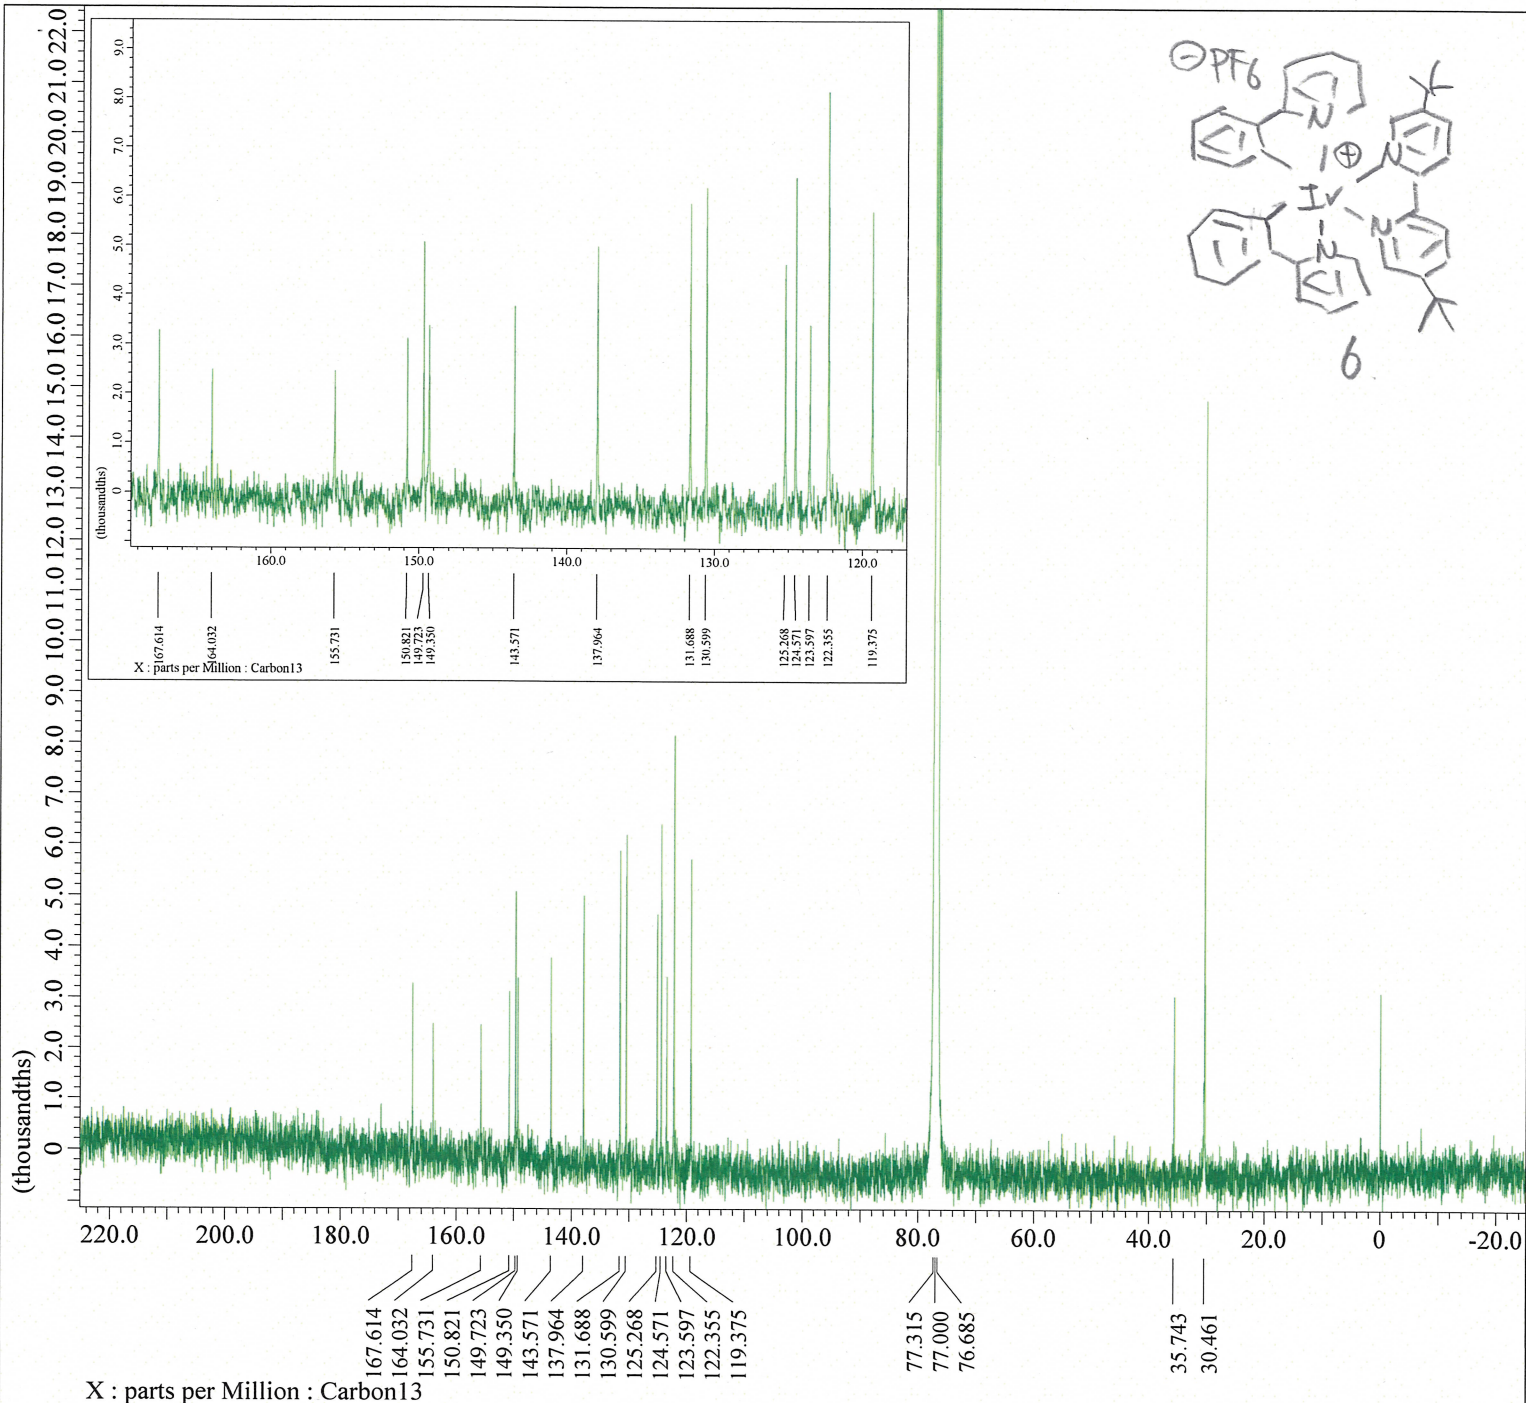

```

---- PROCESSING PARAMETERS ----
dc balance( 0, FALSE )
sexp( 2.0[Hz], 0.0[s] )
trapezoid( 0[%], 0[%], 80[%], 100[%] )
zeroFill( 1 )
fft( 1, TRUE, TRUE )
machinephase
ppm

Derived from: TBR724-C_Carbon-1-1.jdf

```

```

Filename      = TBR724-C_Carbon-1-2.jdf
Author       = element
Experiment   = carbon.jxp
Sample_Id    = TBR724-C
Solvent      = CHLOROFORM-D
Actual_Start_Time = 16-MAR-2023 22:23:38
Revision_Time  = 17-MAR-2023 09:55:33

Comment      = single pulse decoupled ga
Data_Format  = 1D COMPLEX
Dim_Size     = 26214
X_Domain     = Carbon
Dim_Title    = Carbon13
Dim_Units    = [ppm]
Dimensions   = X
Site         = JNM-ECS400
Spectrometer = DELTA2_NMR

```

```

Field_Strength = 9.37221[T] (400[MHz])
X_Acq_Duration = 1.04333312[s]
X_Domain       = 13C
X_Freq         = 100.33735165[MHz]
X_Offset       = 100.0[ppm]
X_Points       = 32768
X_Prescans     = 4
X_Resolution   = 0.95846665[Hz]
X_Sweep        = 31.40703518[kHz]
X_Sweep_Clipped = 25.12562814[kHz]
Irr_Domain     = Proton
Irr_Freq       = 399.03472754[MHz]
Irr_Offset     = 5.0[ppm]
Clipped        = FALSE
Scans          = 10024
Total_Scans    = 10024

```

```

Relaxation_Delay = 2[s]
Recvr_Gain        = 50
Temp_Get          = 18.5[dC]
X_90_Width        = 10.9[us]
X_Acq_Time        = 1.04333312[s]
X_Angle           = 30[deg]
X_Atn             = 5.4[dB]
X_Pulse           = 3.63333333[us]
Irr_Atn_Dec       = 25.823[dB]
Irr_Atn_Noise    = 25.823[dB]
Irr_Noise        = WALTZ
Irr_Pwidth        = 0.115[ms]
Decoupling        = TRUE
Initial_Wait      = 1[s]
Noe               = TRUE
Noe_Time          = 2[s]
Repetition_Time   = 3.04333312[s]

```
